# Supplementary material for: Development of Macrocyclic PRMT5–Adaptor Protein Interaction Inhibitors
Source: PubMed Central journal article supplement (PMC9706563; doi:10.1021/acs.jmedchem.2c01273), 2022-11-15

# Supporting Information

## Development of Macrocyclic PRMT5 Adaptor Protein Interaction Inhibitors

Adrian Krzyzanowski,<sup>[a, b]</sup> Lea Marie Esser,<sup>[c]</sup> Anthony Willaume,<sup>[d]</sup> Renaud Prudent,<sup>[d]</sup> Christoph Peter,<sup>[c]</sup>  
Peter 't Hart<sup>\*[e]</sup> and Herbert Waldmann<sup>\*[a, b]</sup>

---

- [a] A. Krzyzanowski, Prof. Dr. H. Waldmann  
Department of Chemical Biology  
Max Planck Institute of Molecular Physiology  
Otto-Hahn-Straße 11, 44227 Dortmund, Germany
- [b] A. Krzyzanowski, Prof. Dr. H. Waldmann  
Faculty of Chemistry, Chemical Biology  
Technical University Dortmund  
Otto-Hahn-Straße 6, 44221 Dortmund, Germany
- [c] L.M. Esser, Dr. C. Peter  
Institute of Molecular Medicine I  
Medical Faculty and University Hospital, Heinrich Heine University Düsseldorf  
Universitätsstraße 1, 40225 Düsseldorf, Germany
- [d] Dr. A. Willaume, Dr. R. Prudent  
Edelris  
Bioserra 1, 60 Av. Rockefeller, 69008 Lyon, France
- [e] Dr. P. 't Hart  
Chemical Genomics Centre of the Max Planck Society  
Max Planck Institute of Molecular Physiology  
Otto-Hahn-Straße 11, 44227 Dortmund, Germany

\* Corresponding Authors:

P.t.H. Peter.t-Hart@mpi-dortmund.mpg.de

H.W. Herbert.Waldmann@mpi-dortmund.mpg.de

## Table of Contents

|                                    |     |
|------------------------------------|-----|
| Supporting Tables .....            | S3  |
| Supporting Synthetic Schemes ..... | S6  |
| Supporting Figures .....           | S8  |
| HPLC Traces.....                   | S18 |

# Supporting Tables

**Table S1.** Sequences and HRMS of linear peptides with amino acid modifications.

| Name | Sequence                                                                           | HRMS                          |            |
|------|------------------------------------------------------------------------------------|-------------------------------|------------|
|      |                                                                                    | m/z calculated                | m/z found  |
| S2   | Ac- <b>Tyr</b> -PGQFDDADK (Fitc) -NH <sub>2</sub>                                  | 1585.55764 [M+H] <sup>+</sup> | 1585.56081 |
| S3   | Ac- <b>Phe</b> -PGQFDDADK (Fitc) -NH <sub>2</sub>                                  | 1569.56272 [M+H] <sup>+</sup> | 1569.56604 |
| S4   | Ac- <b>hPhe</b> -PGQFDDADK (Fitc) -NH <sub>2</sub>                                 | 1583.57837 [M+H] <sup>+</sup> | 1583.58125 |
| S5   | Ac- <b>Trp</b> -PGQFDDADK (Fitc) -NH <sub>2</sub>                                  | 1608.57362 [M+H] <sup>+</sup> | 1608.57625 |
| S6   | Ac- <b>Asp</b> -PGQFDDADK (Fitc) -NH <sub>2</sub>                                  | 1537.52125 [M+H] <sup>+</sup> | 1537.52441 |
| S7   | Ac- <b>Glu</b> -PGQFDDADK (Fitc) -NH <sub>2</sub>                                  | 1551.53690 [M+H] <sup>+</sup> | 1551.54015 |
| S8   | Ac-VPG- <b>Asn</b> -FDDADK (Fitc) -NH <sub>2</sub>                                 | 1507.54707 [M+H] <sup>+</sup> | 1507.55099 |
| S9   | Ac-VPG- <b>Dab</b> -FDDADK (Fitc) -NH <sub>2</sub>                                 | 1493.56781 [M+H] <sup>+</sup> | 1493.56975 |
| S10  | Ac-VPG- <b>Dab (Alloc)</b> -FDDADK (Fitc) -NH <sub>2</sub>                         | 1577.58894 [M+H] <sup>+</sup> | 1577.59177 |
| S11  | Ac-VPG- <b>Cit</b> -FDDADK (Fitc) -NH <sub>2</sub>                                 | 1550.58927 [M+H] <sup>+</sup> | 1550.59317 |
| 32   | Ac-VPGQ- <b>Phe (3-F)</b> -DDADK (Fitc) -NH <sub>2</sub>                           | 1539.55330 [M+H] <sup>+</sup> | 1539.55557 |
| 34   | Ac-VPGQ- <b>Bip</b> -DDADK (Fitc) -NH <sub>2</sub>                                 | 1597.59402 [M+H] <sup>+</sup> | 1597.59731 |
| 35   | Ac-VPGQ- <b>Phe (3, 4-F<sub>2</sub>)</b> -DDADK (Fitc) -NH <sub>2</sub>            | 1557.54388 [M+H] <sup>+</sup> | 1557.54775 |
| 36   | Ac-VPGQ- <b>Phe (4-F)</b> -DDADK (Fitc) -NH <sub>2</sub>                           | 1539.55330 [M+H] <sup>+</sup> | 1539.55660 |
| 37   | Ac-VPGQ- <b>Phe (4-Br)</b> -DDADK (Fitc) -NH <sub>2</sub>                          | 1599.47323 [M+H] <sup>+</sup> | 1599.47609 |
| 38   | Ac-VPGQ- <b>Phe (4-I)</b> -DDADK (Fitc) -NH <sub>2</sub>                           | 1647.45936 [M+H] <sup>+</sup> | 1647.46158 |
| 39   | Ac-VPGQ- <b>Phe (4-Cl)</b> -DDADK (Fitc) -NH <sub>2</sub>                          | 1555.52375 [M+H] <sup>+</sup> | 1555.52694 |
| 41   | Ac-VPGQ- <b>Phe (4-NO<sub>2</sub>)</b> -DDADK (Fitc) -NH <sub>2</sub>              | 1566.54780 [M+H] <sup>+</sup> | 1566.55130 |
| S12  | Ac-VPGQ- <b>Phe (2-F)</b> -DDADK (Fitc) -NH <sub>2</sub>                           | 1539.55330 [M+H] <sup>+</sup> | 1539.55666 |
| S13  | Ac-VPGQ- <b>Phe (F<sub>5</sub>)</b> -DDADK (Fitc) -NH <sub>2</sub>                 | 1611.51561 [M+H] <sup>+</sup> | 1611.51901 |
| S14  | Ac-VPGQ- <b>Phe (2-I)</b> -DDADK (Fitc) -NH <sub>2</sub>                           | 1647.45936 [M+H] <sup>+</sup> | 1647.46197 |
| S15  | Ac-VPGQ- <b>Phe (3-Cl)</b> -DDADK (Fitc) -NH <sub>2</sub>                          | 1555.52375 [M+H] <sup>+</sup> | 1555.52705 |
| S16  | Ac-VPGQ- <b>Phe (3-CF<sub>3</sub>)</b> -DDADK (Fitc) -NH <sub>2</sub>              | 1589.55011 [M+H] <sup>+</sup> | 1589.55440 |
| S17  | Ac-VPGQ- <b>2-Pal</b> -DDADK (Fitc) -NH <sub>2</sub>                               | 1522.55797 [M+H] <sup>+</sup> | 1522.56122 |
| S18  | Ac-VPGQ- <b>Tyr</b> -DDADK (Fitc) -NH <sub>2</sub>                                 | 1537.55764 [M+H] <sup>+</sup> | 1537.56120 |
| S19  | Ac-VPGQ- <b>Phe (4-COOH)</b> -DDADK (Fitc) -NH <sub>2</sub>                        | 1565.55255 [M+H] <sup>+</sup> | 1565.55556 |
| S20  | Ac-VPGQ- <b>Phe (4-guanidino)</b> -DDADK (Fitc) -NH <sub>2</sub>                   | 1578.59542 [M+H] <sup>+</sup> | 1578.59706 |
| S21  | Ac-VPGQ- <b>hPhe</b> -DDADK (Fitc) -NH <sub>2</sub>                                | 1535.57837 [M+H] <sup>+</sup> | 1535.58161 |
| S22  | Ac-VPGQ- <b>3- (2-biphenyl)</b> -Ala-DDADK (Fitc) -NH <sub>2</sub>                 | 1597.59402 [M+H] <sup>+</sup> | 1597.59787 |
| S23  | Ac-VPGQ- <b>Bpa</b> -DDADK (Fitc) -NH <sub>2</sub>                                 | 1625.58894 [M+H] <sup>+</sup> | 1625.59170 |
| S24  | Ac-VPGQ- <b>2-Nal</b> -DDADK (Fitc) -NH <sub>2</sub>                               | 1571.57837 [M+H] <sup>+</sup> | 1571.58183 |
| S25  | Ac-VPGQ- <b>1-Nal</b> -DDADK (Fitc) -NH <sub>2</sub>                               | 1571.57837 [M+H] <sup>+</sup> | 1571.58167 |
| S26  | Ac-VPGQFD- <b>Gla</b> -ADK (Fitc) -NH <sub>2</sub>                                 | 1579.56820 [M+H] <sup>+</sup> | 1579.57063 |
| S27  | Ac-VPGQFDD- <b>Abu</b> -DK (Fitc) -NH <sub>2</sub>                                 | 1535.57837 [M+H] <sup>+</sup> | 1535.58199 |
| S28  | Ac-VPGQFDD- <b>Nva</b> -DK (Fitc) -NH <sub>2</sub>                                 | 1549.59402 [M+H] <sup>+</sup> | 1549.59737 |
| S29  | Ac-VPGQFDD- <b>Nle</b> -DK (Fitc) -NH <sub>2</sub>                                 | 1563.60967 [M+H] <sup>+</sup> | 1563.61310 |
| S30  | Ac-VPGQFDD- <b>Cha</b> -DK (Fitc) -NH <sub>2</sub>                                 | 1603.64097 [M+H] <sup>+</sup> | 1603.64485 |
| S31  | Ac-VPGQFDD- <b>Ser</b> -DK (Fitc) -NH <sub>2</sub>                                 | 1537.55764 [M+H] <sup>+</sup> | 1537.56164 |
| 33   | Ac-VPGQFDDA- <b>Glu</b> -K (Fitc) -NH <sub>2</sub>                                 | 1535.57837 [M+H] <sup>+</sup> | 1535.58145 |
| 40   | Ac-VPGQFDDA- <b>Gla</b> -K (Fitc) -NH <sub>2</sub>                                 | 1579.56820 [M+H] <sup>+</sup> | 1579.57062 |
| S32  | Ac-VPGQFDDA- <b>Tyr</b> -K (Fitc) -NH <sub>2</sub>                                 | 1569.59911 [M+H] <sup>+</sup> | 1569.60176 |
| S33  | Ac-VPGQFDDA- <b>Trp</b> -K (Fitc) -NH <sub>2</sub>                                 | 1592.61509 [M+H] <sup>+</sup> | 1592.61751 |
| S34  | Ac-VPGQFDDA- <b>hPhe</b> -K (Fitc) -NH <sub>2</sub>                                | 1567.61984 [M+H] <sup>+</sup> | 1567.62296 |
| 42   | Ac-VPGQ- <b>Phe (4-Cl)</b> -DDA- <b>Gla</b> -K (Fitc) -NH <sub>2</sub>             | 1613.52923 [M+H] <sup>+</sup> | 1613.53080 |
| 43   | Ac-VPGQ- <b>Phe (4-NO<sub>2</sub>)</b> -DDA- <b>Gla</b> -K (Fitc) -NH <sub>2</sub> | 1624.55328 [M+H] <sup>+</sup> | 1624.55454 |

**Table S2.** Direct binding FP results for *N*-methylated linear peptides **44-49**.

| Peptide   | Sequence                                                        | K <sub>D</sub> (μM) |
|-----------|-----------------------------------------------------------------|---------------------|
| <b>44</b> | Ac-VPGQFDDA- ( <b>N-Me</b> ) <b>D</b> -K (Fitc)-NH <sub>2</sub> | 0.6 ± 0.1           |
| <b>45</b> | Ac-VPGQFDD- ( <b>N-Me</b> ) <b>A</b> -DK (Fitc)-NH <sub>2</sub> | >2                  |
| <b>46</b> | Ac-VPGQFD- ( <b>N-Me</b> ) <b>D</b> -ADK (Fitc)-NH <sub>2</sub> | >2                  |
| <b>47</b> | Ac-VPGQ- ( <b>N-Me</b> ) <b>F</b> -DDADK (Fitc)-NH <sub>2</sub> | >2                  |
| <b>48</b> | Ac-VP- ( <b>N-Me</b> ) <b>G</b> -QFDDADK (Fitc)-NH <sub>2</sub> | >2                  |
| <b>49</b> | Ac- ( <b>N-Me</b> ) <b>V</b> -PGQFDDADK (Fitc)-NH <sub>2</sub>  | >2                  |

**Table S3.** Sequences and HRMS data of linear RioK1-derived peptides.

| Name              | Sequence                                                        | HRMS                            |            |
|-------------------|-----------------------------------------------------------------|---------------------------------|------------|
|                   |                                                                 | m/z calculated                  | m/z found  |
| <b>1</b>          | Ac-SRVVPaQFDDAD-NH <sub>2</sub>                                 | 1360.64917 [M+H] <sup>+</sup>   | 1360.65083 |
| <b>2</b>          | Ac-SRVVPGQFaDAD-NH <sub>2</sub>                                 | 1302.64369 [M+H] <sup>+</sup>   | 1302.64518 |
| <b>3</b>          | Ac-SRVVPaQFaDAD-NH <sub>2</sub>                                 | 1316.65934 [M+H] <sup>+</sup>   | 1316.66100 |
| <b>4</b>          | Ac-SRVVPGQFDDAD-NH <sub>2</sub>                                 | 1346.63352 [M+H] <sup>+</sup>   | 1346.63623 |
| <b>28</b>         | Fitc-O2Oc-VPGQFDDAD-NH <sub>2</sub>                             | 1496.53109 [M+H] <sup>+</sup>   | 1496.53270 |
| <b>29</b>         | Ac-VPGQFDDADK (Fitc)-NH <sub>2</sub>                            | 1521.56272 [M+H] <sup>+</sup>   | 1521.56580 |
| <b>31</b>         | Ac-VPGQFDDAD-NH <sub>2</sub>                                    | 1004.43197 [M+H] <sup>+</sup>   | 1004.42952 |
| <b>44</b>         | Ac-VPGQFDDA- ( <b>N-Me</b> ) <b>D</b> -K (Fitc)-NH <sub>2</sub> | 1535.57837 [M+H] <sup>+</sup>   | 1535.58195 |
| <b>45</b>         | Ac-VPGQFDD- ( <b>N-Me</b> ) <b>A</b> -DK (Fitc)-NH <sub>2</sub> | 1535.57837 [M+H] <sup>+</sup>   | 1535.58169 |
| <b>46</b>         | Ac-VPGQFD- ( <b>N-Me</b> ) <b>D</b> -ADK (Fitc)-NH <sub>2</sub> | 1535.57837 [M+H] <sup>+</sup>   | 1535.58178 |
| <b>47</b>         | Ac-VPGQ- ( <b>N-Me</b> ) <b>F</b> -DDADK (Fitc)-NH <sub>2</sub> | 1535.57837 [M+H] <sup>+</sup>   | 1535.58196 |
| <b>48</b>         | Ac-VP- ( <b>N-Me</b> ) <b>G</b> -QFDDADK (Fitc)-NH <sub>2</sub> | 1535.57837 [M+H] <sup>+</sup>   | 1535.58188 |
| <b>49</b>         | Ac- ( <b>N-Me</b> ) <b>V</b> -PGQFDDADK (Fitc)-NH <sub>2</sub>  | 1535.57837 [M+H] <sup>+</sup>   | 1535.58070 |
| <b>S1</b>         | Fitc-O2Oc-SRVVPGQFDDADSSD-NH <sub>2</sub>                       | 1064.41546 [M+2H] <sup>2+</sup> | 1064.41816 |
| <b>H4 peptide</b> | Ac-SGRGKGGKGLGKGGAKRHRKV-NH <sub>2</sub>                        | 1066.64103 [M+2H] <sup>2+</sup> | 1066.64198 |

**Table S4.** HRMS of cyclic peptides.

| Name        | HRMS                           |            |
|-------------|--------------------------------|------------|
|             | m/z calculated                 | m/z found  |
| 5           | 925.37795 [M+2H] <sup>2+</sup> | 925.37895  |
| 6           | 932.38578 [M+2H] <sup>2+</sup> | 932.38677  |
| 7           | 932.38578 [M+2H] <sup>2+</sup> | 932.38673  |
| 8           | 939.39360 [M+2H] <sup>2+</sup> | 939.39476  |
| 9           | 925.37795 [M+2H] <sup>2+</sup> | 925.37888  |
| 10          | 932.38578 [M+2H] <sup>2+</sup> | 932.38677  |
| 11          | 932.38578 [M+2H] <sup>2+</sup> | 932.38673  |
| 12          | 939.39360 [M+2H] <sup>2+</sup> | 939.39480  |
| 13          | 916.88287 [M+2H] <sup>2+</sup> | 916.88398  |
| 14          | 917.89069 [M+2H] <sup>2+</sup> | 917.89179  |
| 15 isomer 1 | 916.88287 [M+2H] <sup>2+</sup> | 916.88396  |
| 15 isomer 2 | 916.88287 [M+2H] <sup>2+</sup> | 916.88397  |
| 16          | 917.89069 [M+2H] <sup>2+</sup> | 917.89172  |
| 17          | 758.29791 [M+2H] <sup>2+</sup> | 758.29659  |
| 18 isomer 1 | 765.30573 [M+2H] <sup>2+</sup> | 765.30446  |
| 18 isomer 2 | 765.30573 [M+2H] <sup>2+</sup> | 765.30464  |
| 19          | 765.30573 [M+2H] <sup>2+</sup> | 765.30440  |
| 20          | 772.31356 [M+2H] <sup>2+</sup> | 772.31227  |
| 21          | 766.31356 [M+2H] <sup>2+</sup> | 766.31240  |
| 22          | 773.32138 [M+2H] <sup>2+</sup> | 773.32047  |
| 23          | 765.30573 [M+2H] <sup>2+</sup> | 765.30441  |
| 24          | 765.30573 [M+2H] <sup>2+</sup> | 765.30475  |
| 25          | 772.31356 [M+2H] <sup>2+</sup> | 772.31239  |
| 26          | 766.31356 [M+2H] <sup>2+</sup> | 766.31275  |
| 27          | 773.32138 [M+2H] <sup>2+</sup> | 773.32047  |
| 30          | 1014.48909 [M+H] <sup>+</sup>  | 1014.48752 |
| 50          | 1634.61040 [M+H] <sup>+</sup>  | 1634.61054 |
| 51          | 1438.48922 [M+H] <sup>+</sup>  | 1438.48948 |
| 52          | 1634.61040 [M+H] <sup>+</sup>  | 1634.61064 |
| 53          | 1117.47964 [M+H] <sup>+</sup>  | 1117.48050 |
| 54          | 1117.47964 [M+H] <sup>+</sup>  | 1117.48031 |
| 55          | 1460.66521 [M+H] <sup>+</sup>  | 1460.66729 |
| 56          | 1460.66521 [M+H] <sup>+</sup>  | 1460.66757 |

## Supporting Synthetic Schemes

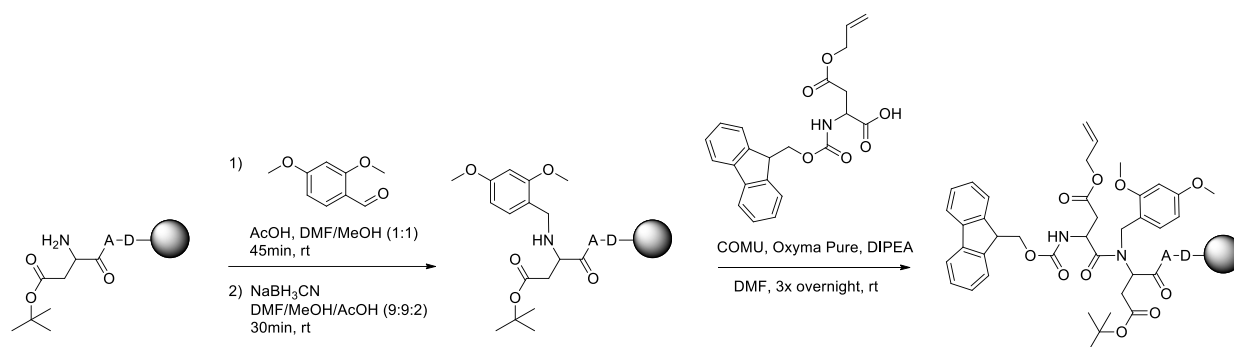

**Scheme S1.** On-resin protection with Dmb and coupling of the resulting Dmb-DAD sequence to Fmoc-Asp(OAll), en route to peptides **5**, **7**, **9** and **11**.

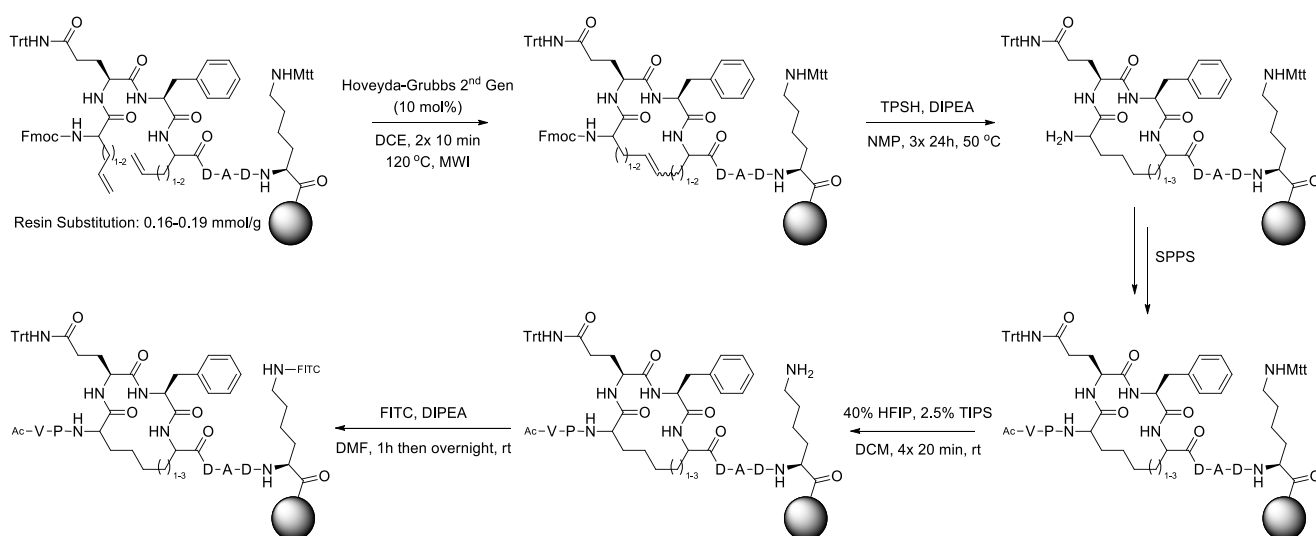

**Scheme S2.** Cyclisation through RCM and reduction of the resulting double bond, followed by Mtt removal and labelling with FITC for C-terminally labelled macrocycles. For peptides with a double bond the TPSH reduction step was omitted.

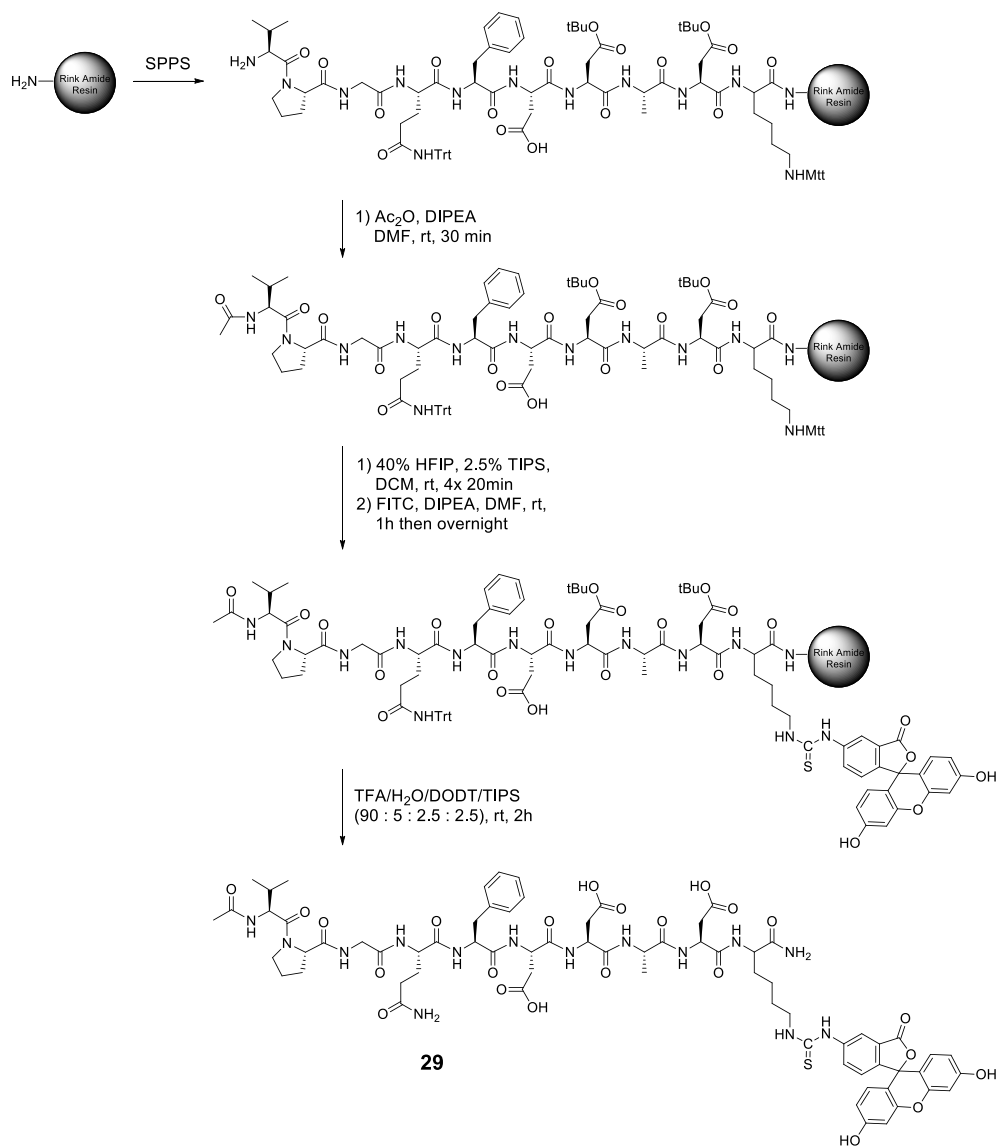

**Scheme S3.** An exemplary synthetic scheme leading to N-terminally acetylated and C-terminally FITC-labelled linear peptide **29**.

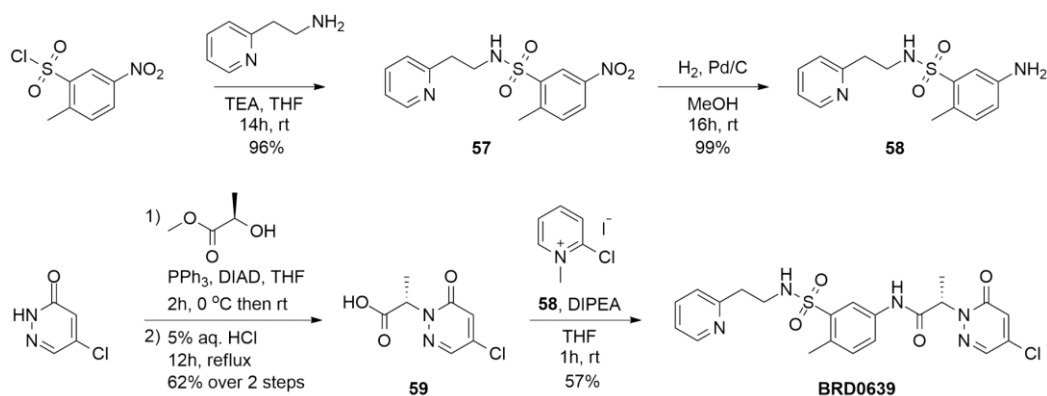

**Scheme S4.** Synthesis of the covalent PRMT5 PPI inhibitor BRD0639.

## Supporting Figures

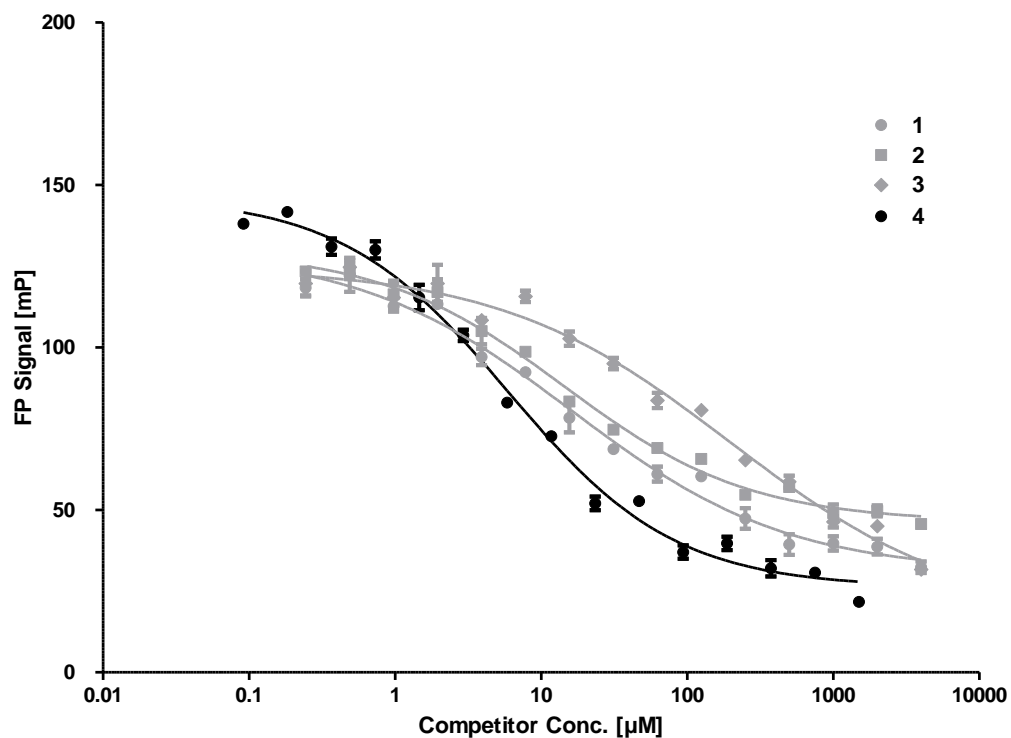

**Figure S1.** Competitive binding FP with PRMT5-MEP50 and peptide S1 (Table S1) used as a fluorescent tracer, for compounds 1-4.

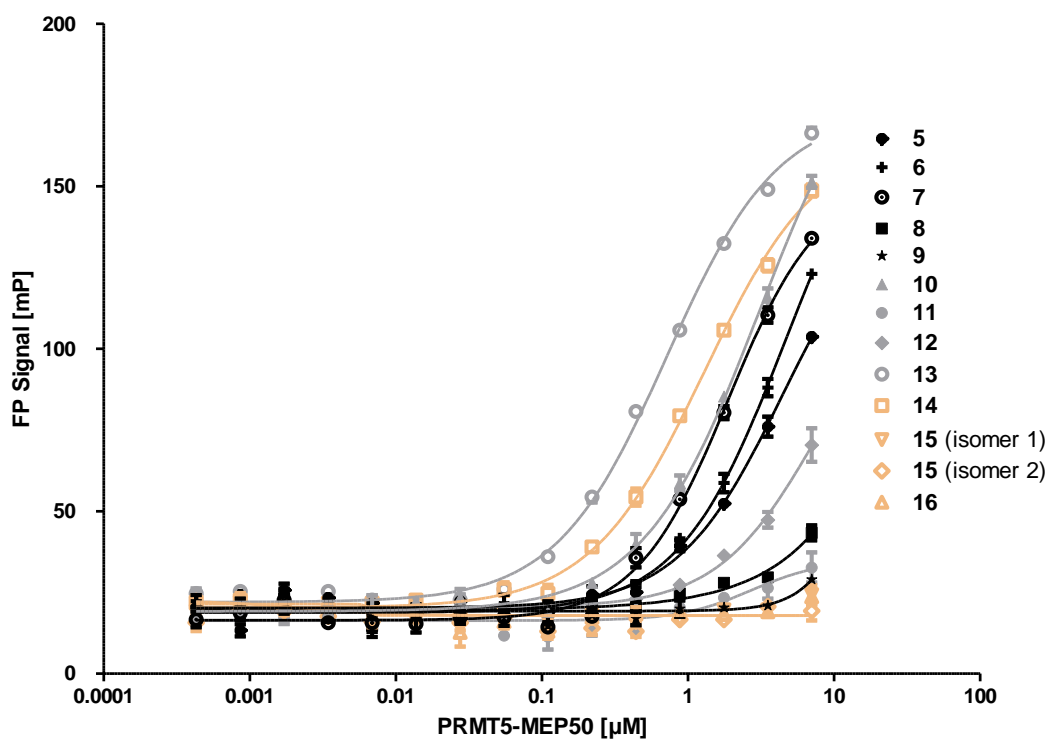

**Figure S2.** Direct binding FP with PRMT5-MEP50 for compounds 5-16.



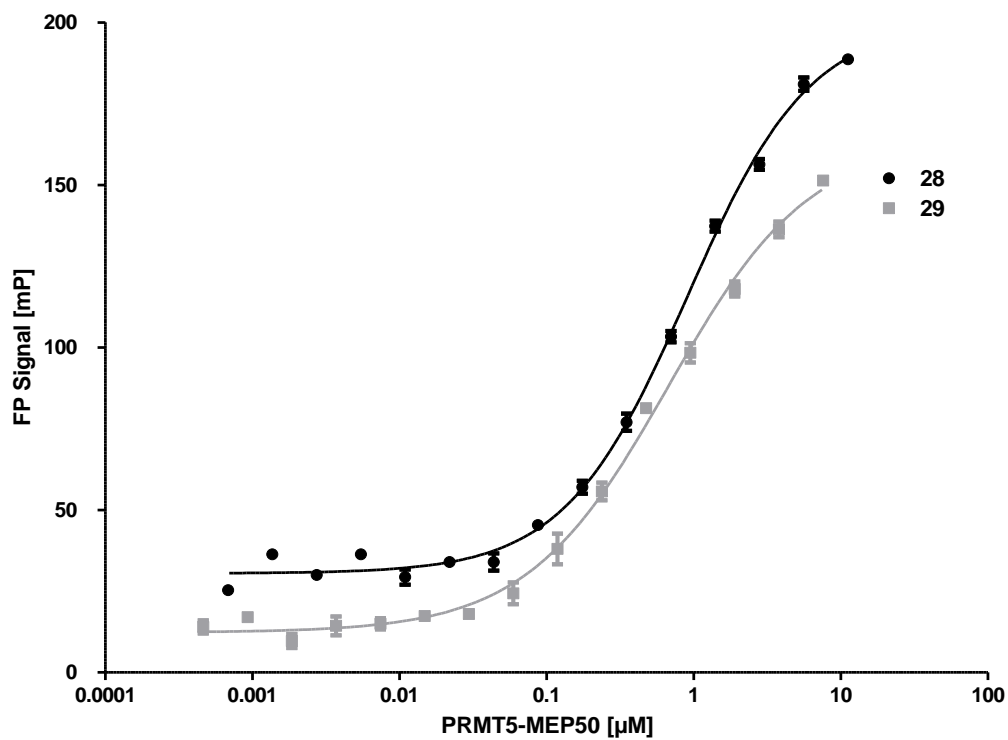

Figure S3. Direct binding FP with PRMT5-MEP50 for compound **28** and **29**.

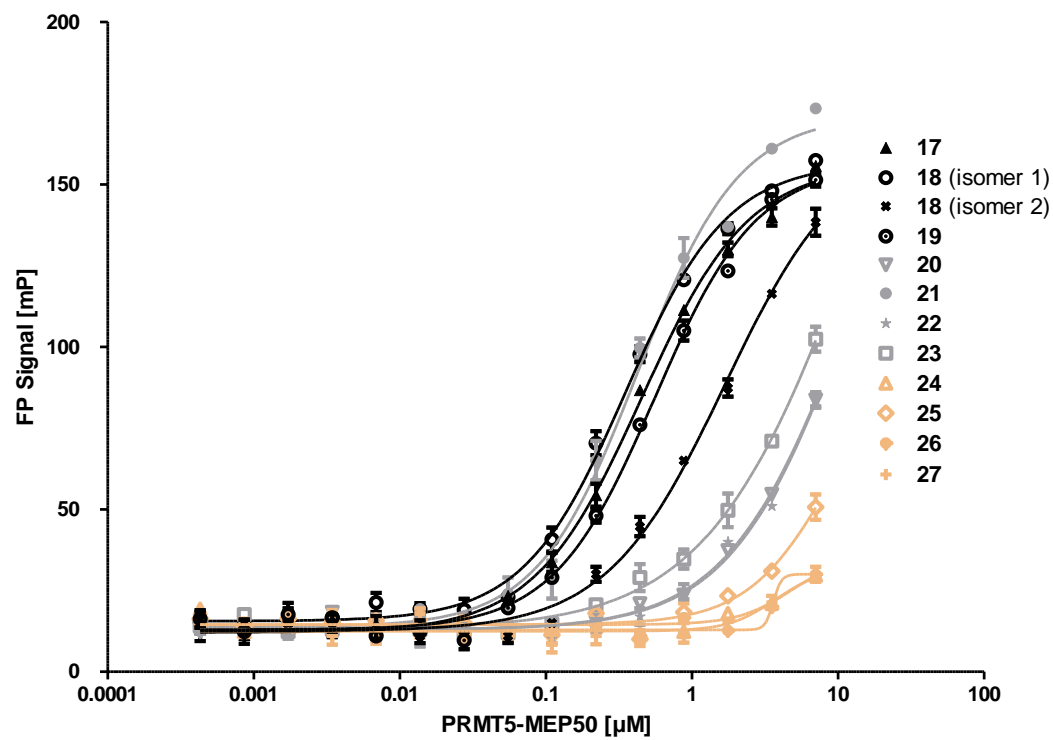

Figure S4. Direct binding FP with PRMT5-MEP50 for compounds **17-27**.

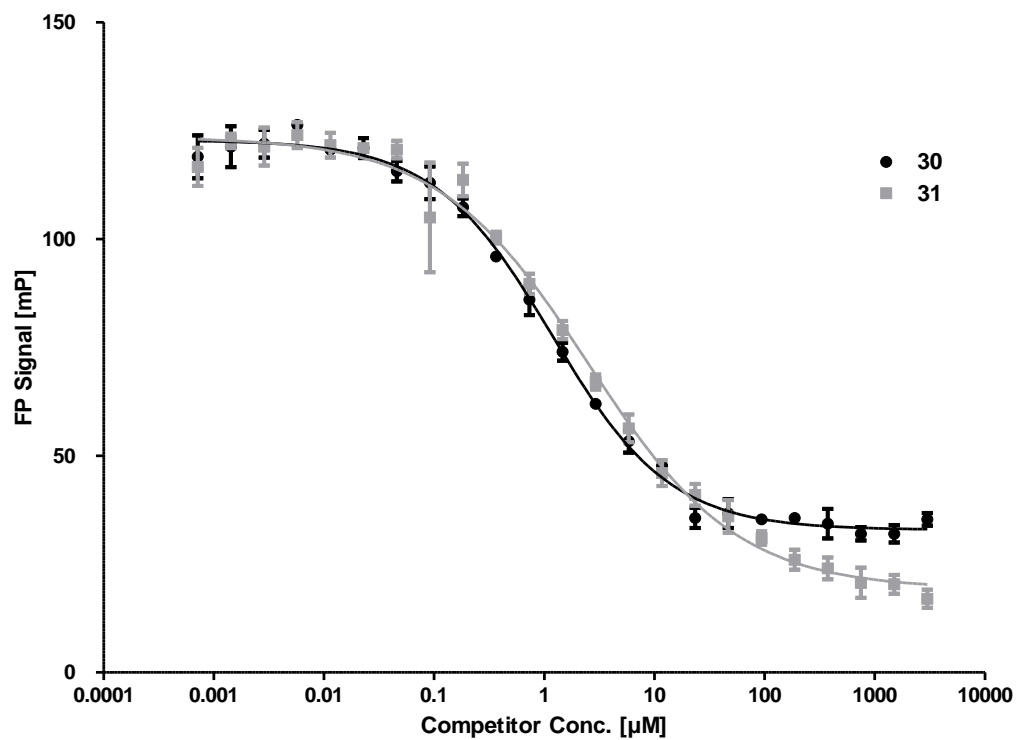

**Figure S5.** Competitive binding FP with PRMT5-MEP50 and fluorescent **21** used as a tracer, for compounds **30** and **31**.

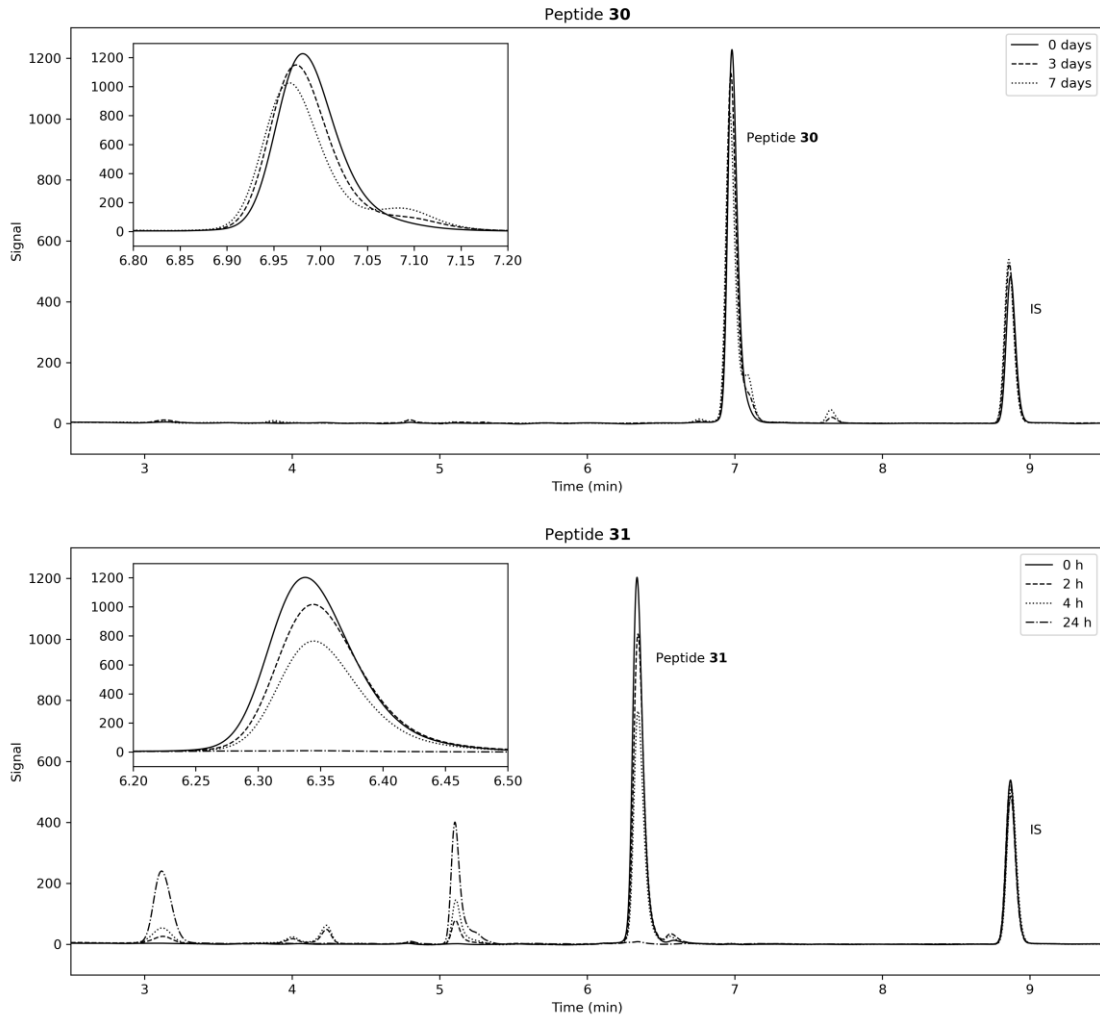

**Figure S6.** HPLC analysis of cyclic **30** and linear **31** after incubation in the U2OS cell lysate. Presented timepoints: between 0-7 days for **30** and between 0-24 h for **31**. IS = Internal Standard.

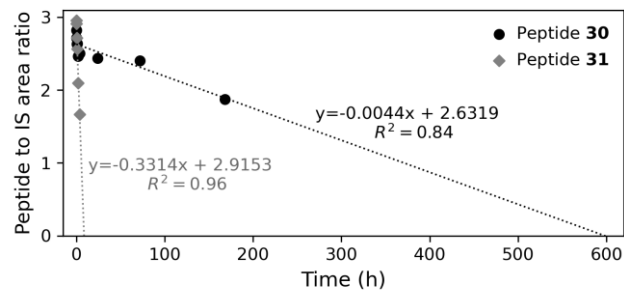

**Figure S7.** Linear regression models based on the obtained stability data for **30** and **31**.  $T_{1/2} = 299$  h or 12.5 days for **30** and  $t_{1/2} = 4.4$  h for **31** (n=2).

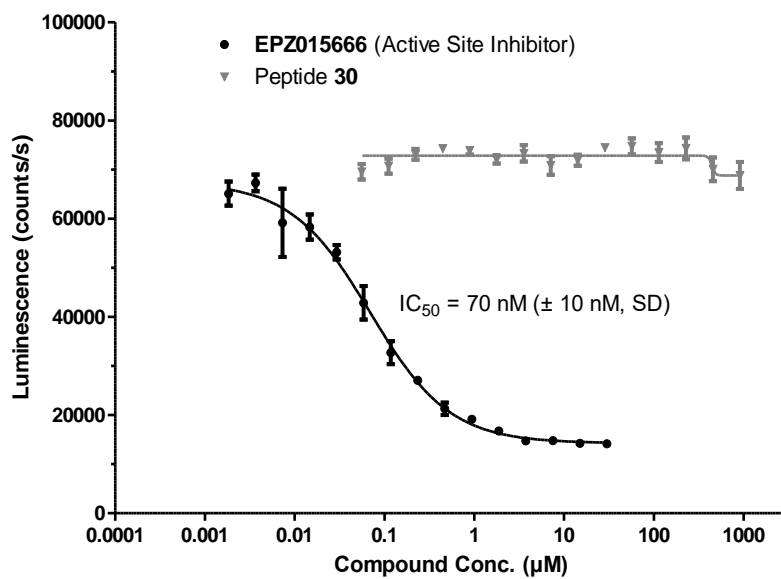

**Figure S8.** Mtase-Glo™ Methyltransferase Assay performed on the isolated PRMT-MEP50 complex with **30** and the reference active-site methyltransferase inhibitor **EPZ015666**. Compound **EPZ015666** is able to inhibit the direct methylation of the H4 histone tail peptide by PRMT5, whereas **30** has no effect (n=3).

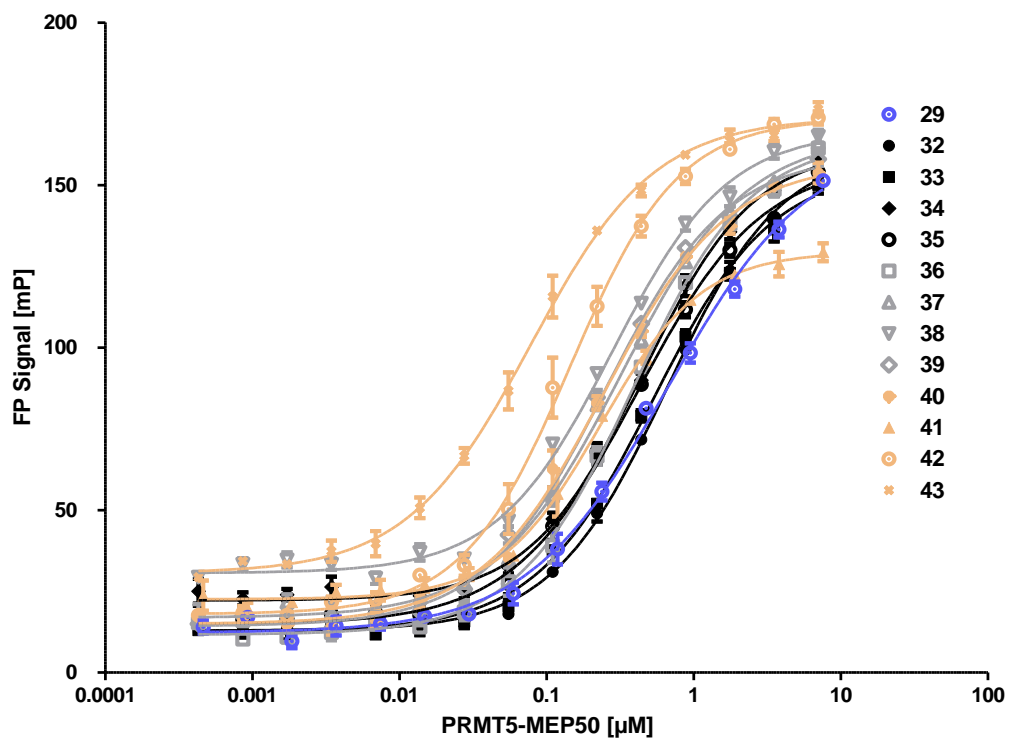

Figure S9. Direct binding FP with PRMT5-MEP50 for compounds 29 and 32-43.

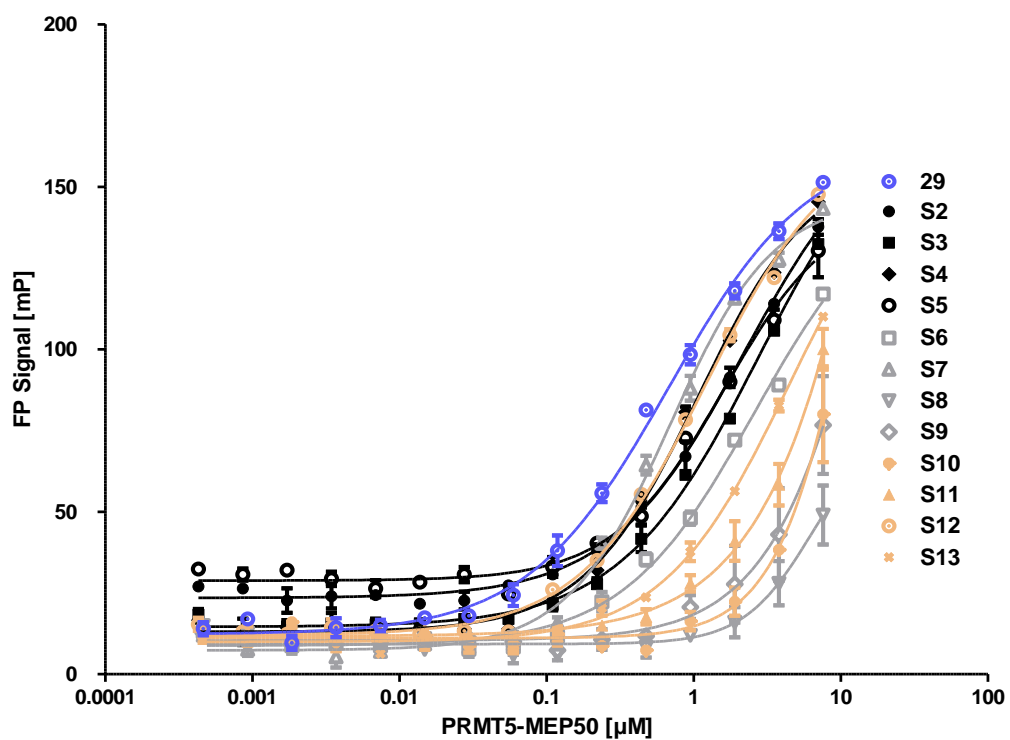

Figure S10. Direct binding FP with PRMT5-MEP50 for compounds 29 and S3-S14.

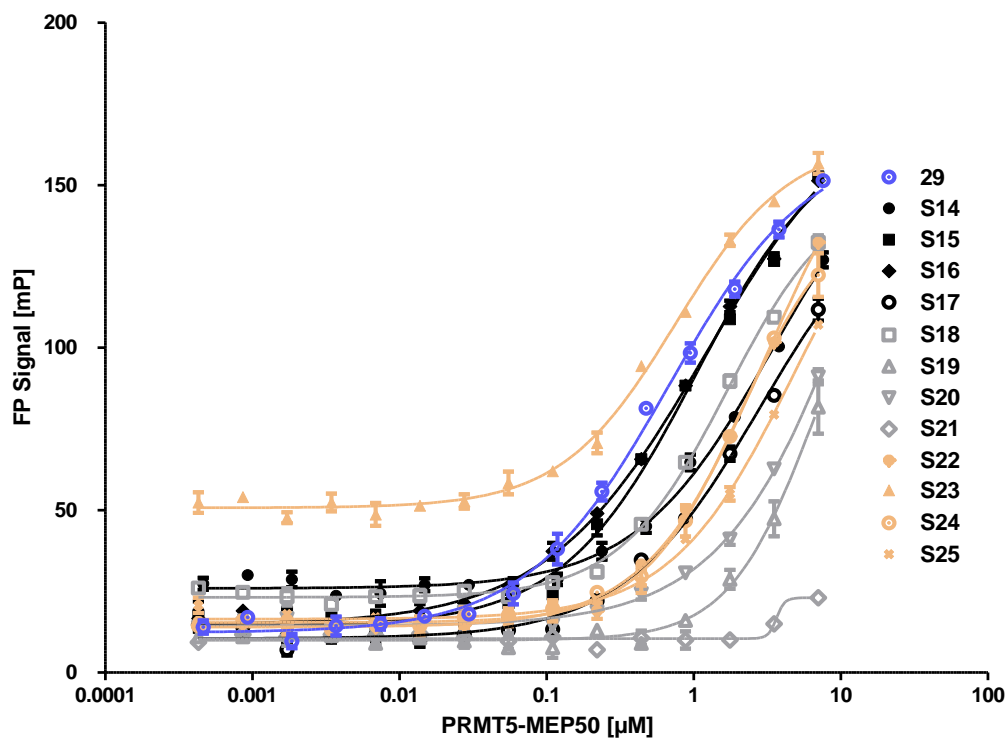

Figure S11. Direct binding FP with PRMT5-MEP50 for compounds **29** and **S14-S25**.

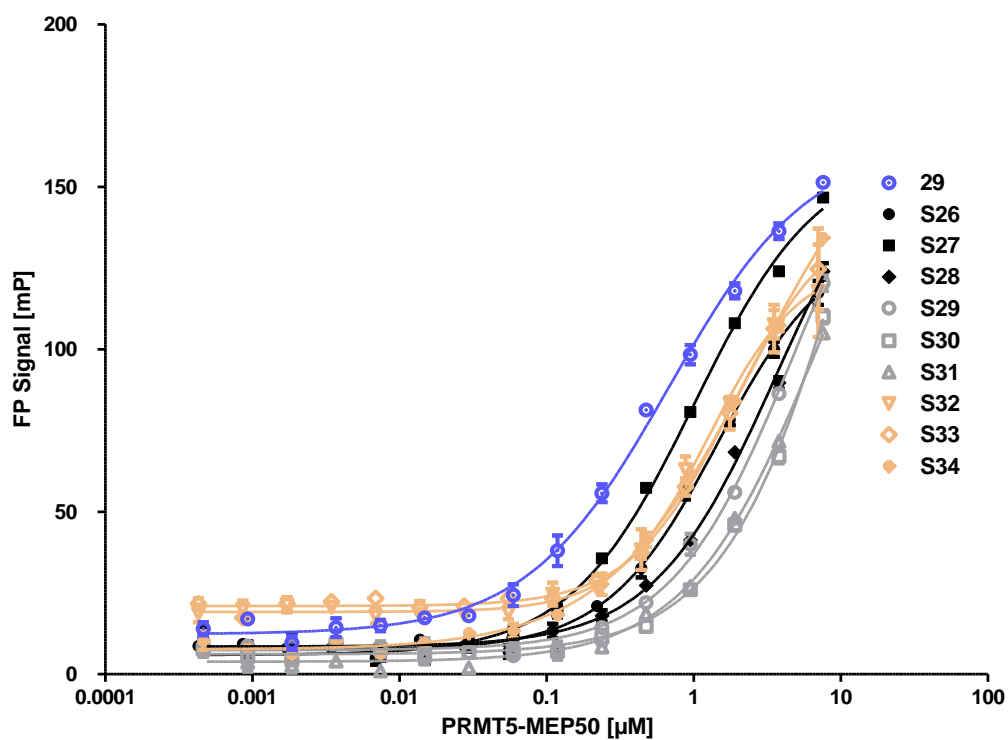

Figure S12. Direct binding FP with PRMT5-MEP50 for compounds **29** and **S26-S34**.

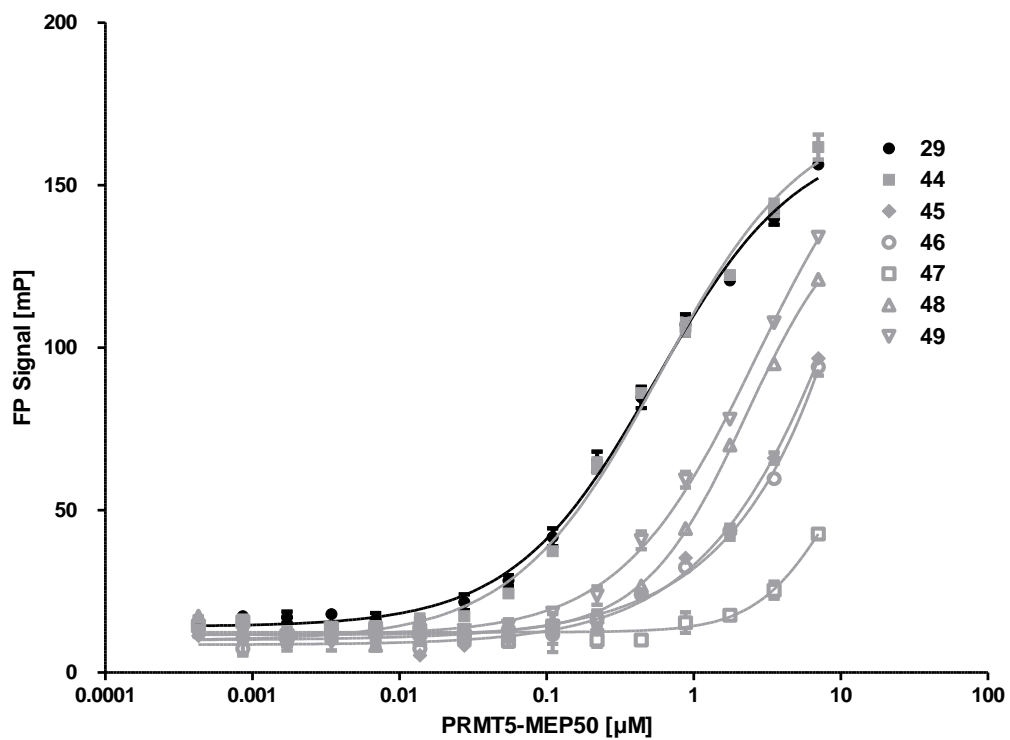

Figure S13. Direct binding FP with PRMT5-MEP50 for compounds 29 and 44-49.

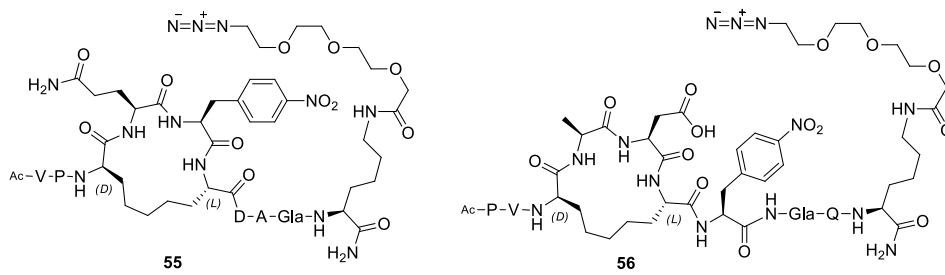

**Figure S14.** Structures of cyclic peptides **55** and **56**, equipped with azide group.

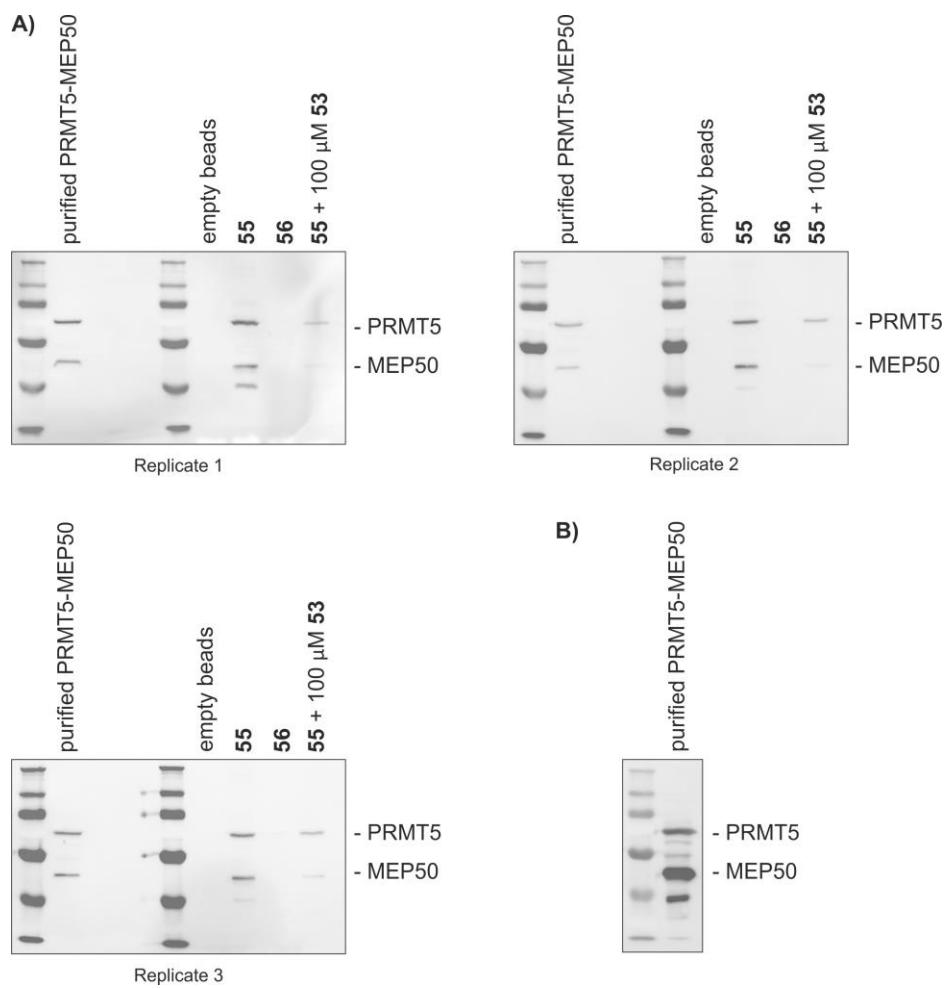

**Figure S15. A)** Results of the pull-down assay with peptide **55** and scrambled peptide **56** immobilised on the DBCO beads, using MCF7 cell lysate. **B)** Western blot of the purified PRMT5-MEP50 complex analysed at a higher concentration than in A).



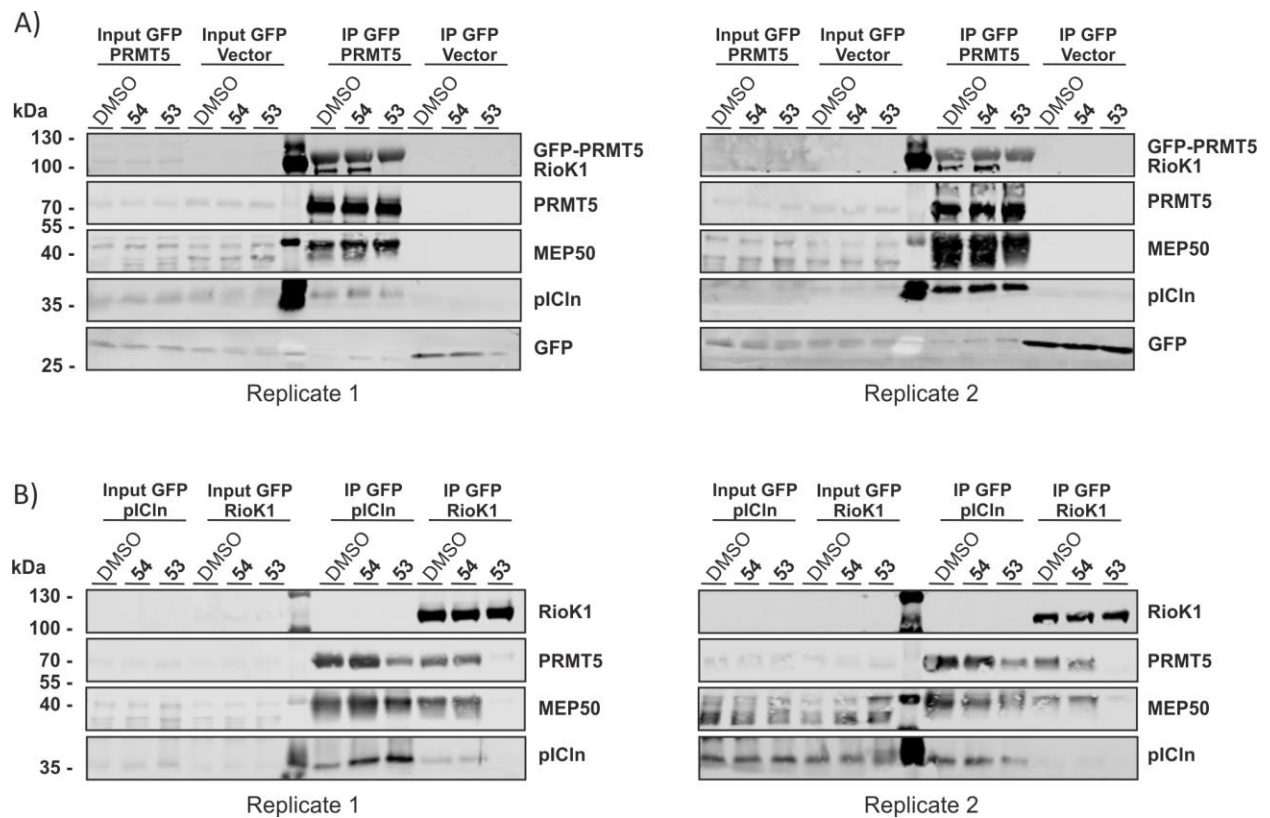

**Figure S16. A)** GFP-Immunoprecipitation (GFP-IP) in Flp-In T-REx 293-GFP and Flp-In T-REx 293-GFP-PRMT5 overexpressing cells after testing active **53** and scrambled **54** at 50  $\mu$ M and DMSO as a control. Therefore, cells were stimulated with 0.1  $\mu$ g/ml doxycycline for 18 h before cytoplasm extraction (S100). GFP-IP was performed and analyzed by Tris/Glycine-SDS-PAGE and western blotting using antibodies against RioK1, PRMT5, MEP50, pICln and GFP. **B)** GFP-IP from Flp-In T-REx 293-GFP-pICln and Flp-In T-REx 293-GFP-RioK1 cytoplasmic extract after testing active **53** and scrambled **54** at 50  $\mu$ M and DMSO as a control. Induction of the overexpression, Tris/Glycine-SDS-PAGE and western blotting using antibodies against RioK1, PRMT5, MEP50 and pICln was performed as described in **A**.

# HPLC Traces

Peptide 1 (Method A)

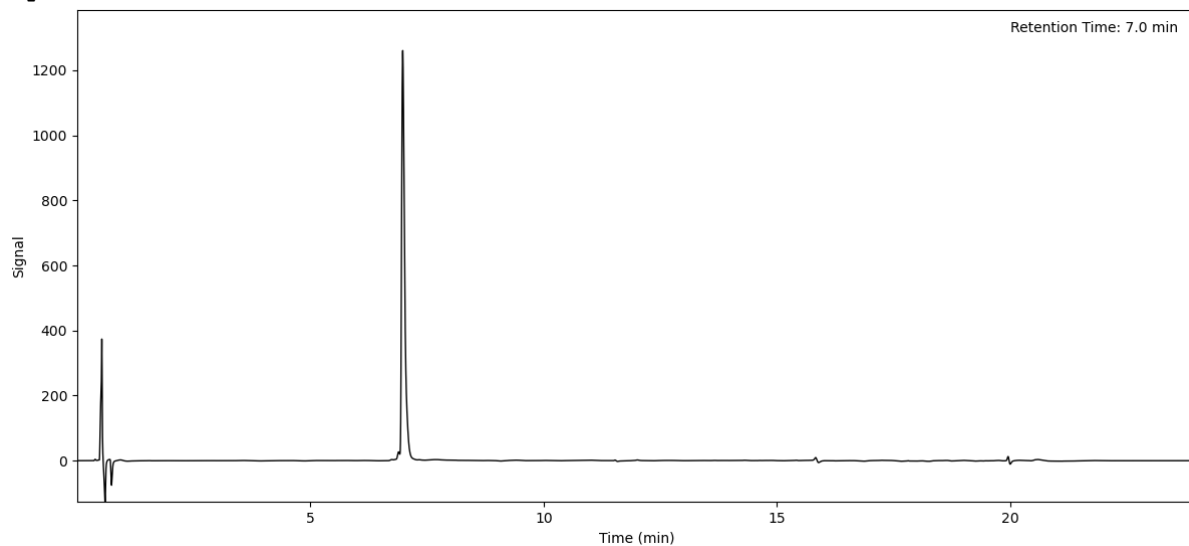

Peptide 2 (Method A)

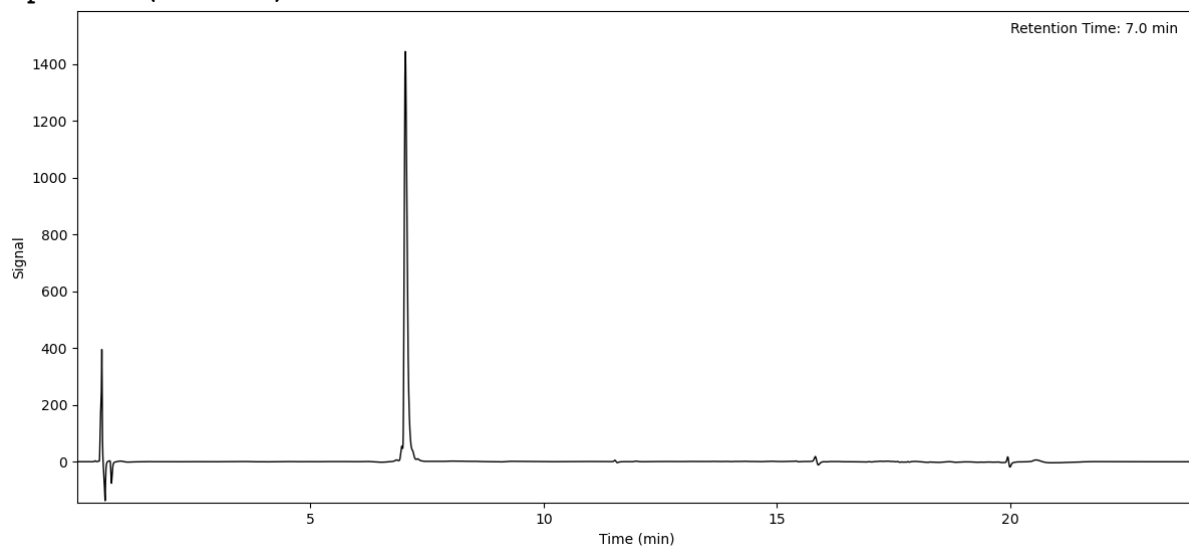

Peptide 3 (Method A)

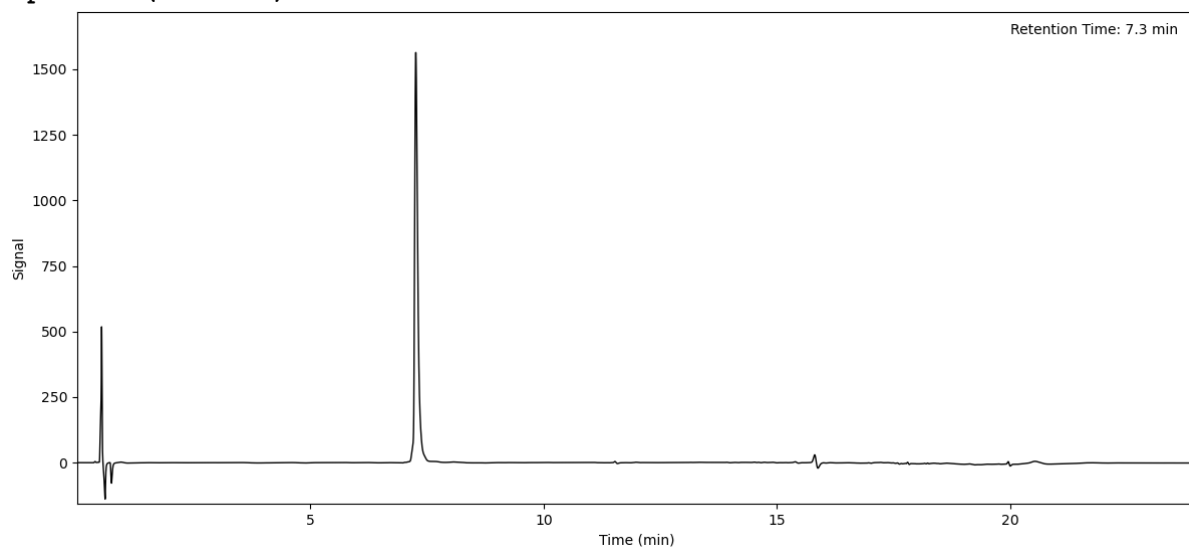

**Peptide 4 (Method A)**

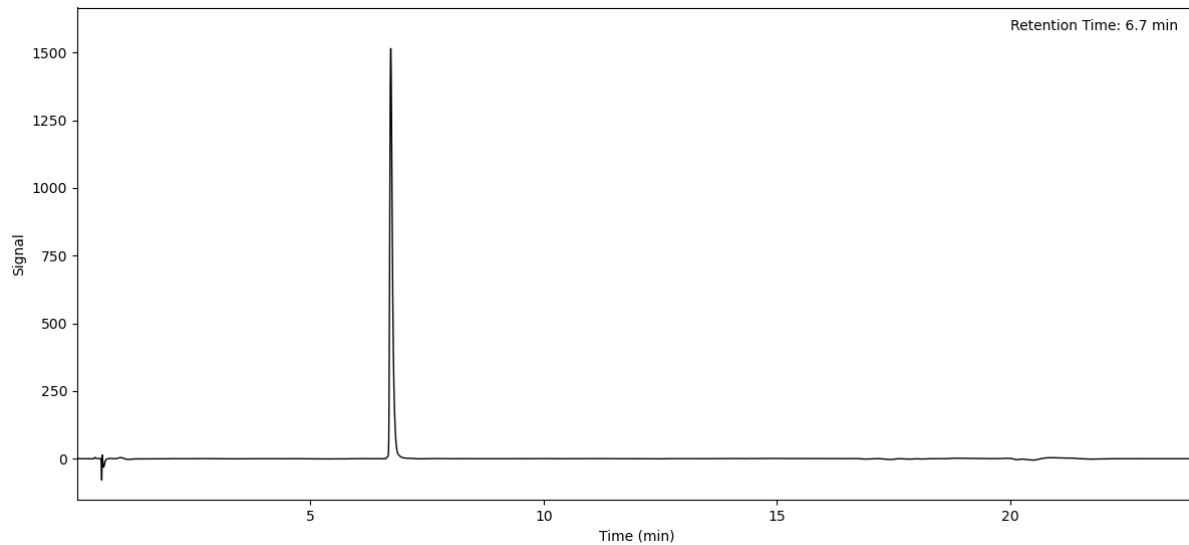

**Peptide 5 (Method A)**

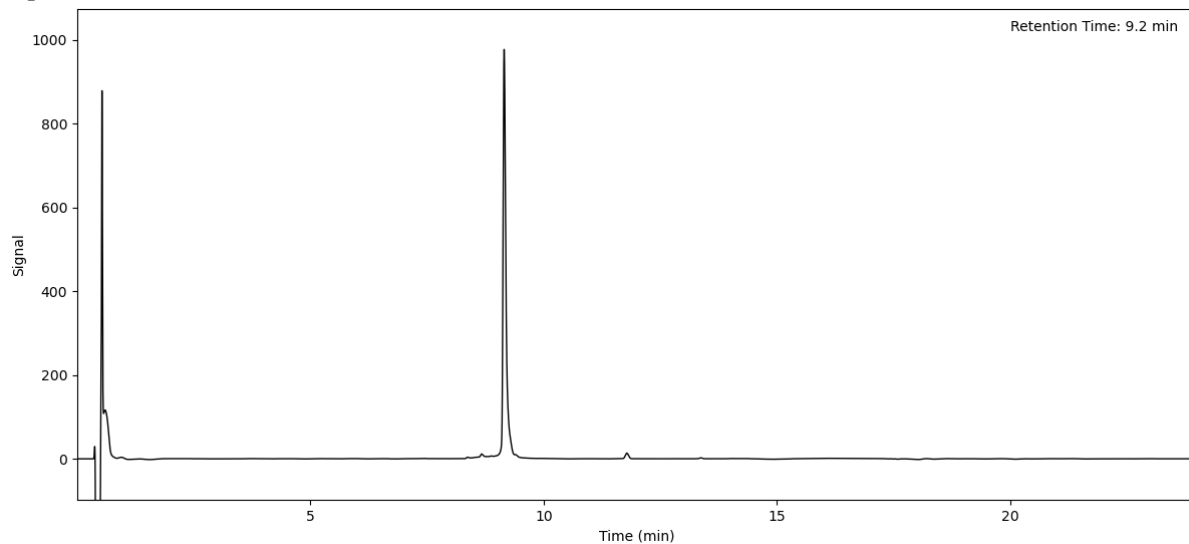

**Peptide 6 (Method A)**

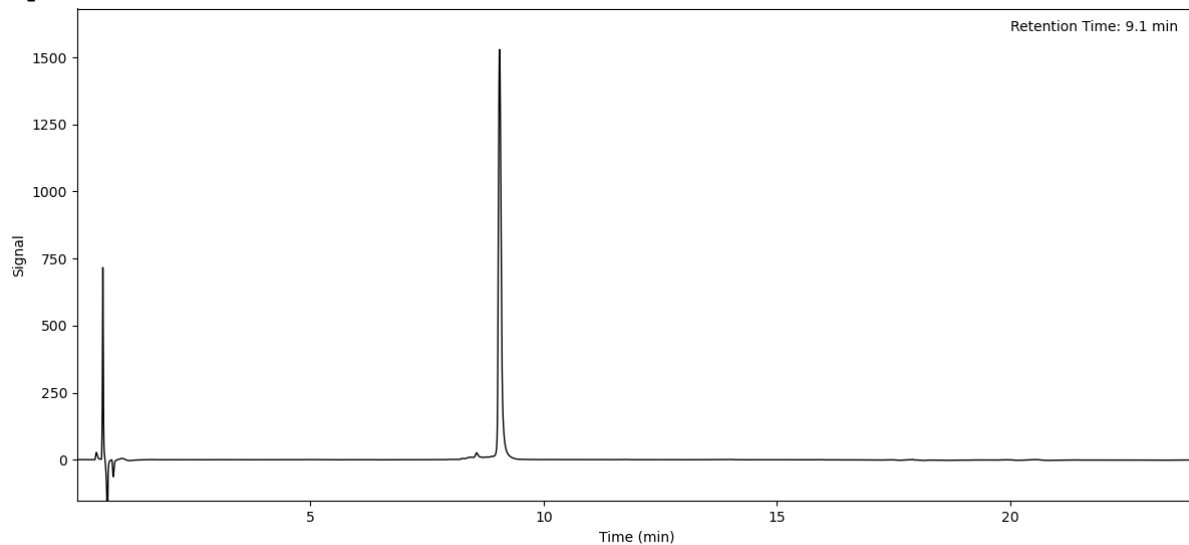

**Peptide 7 (Method A)**

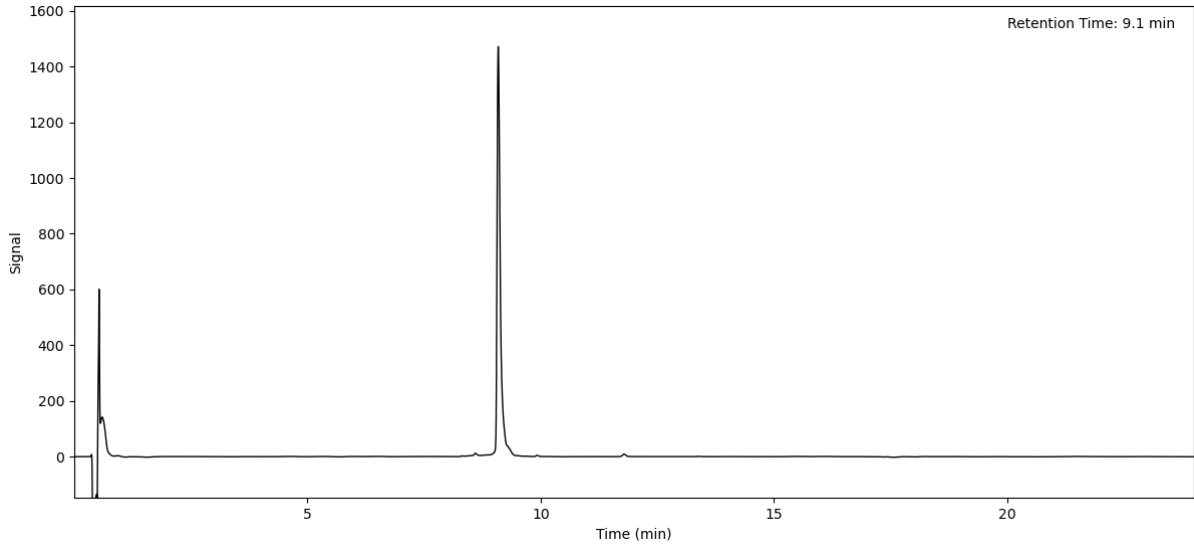

**Peptide 8 (Method A)**

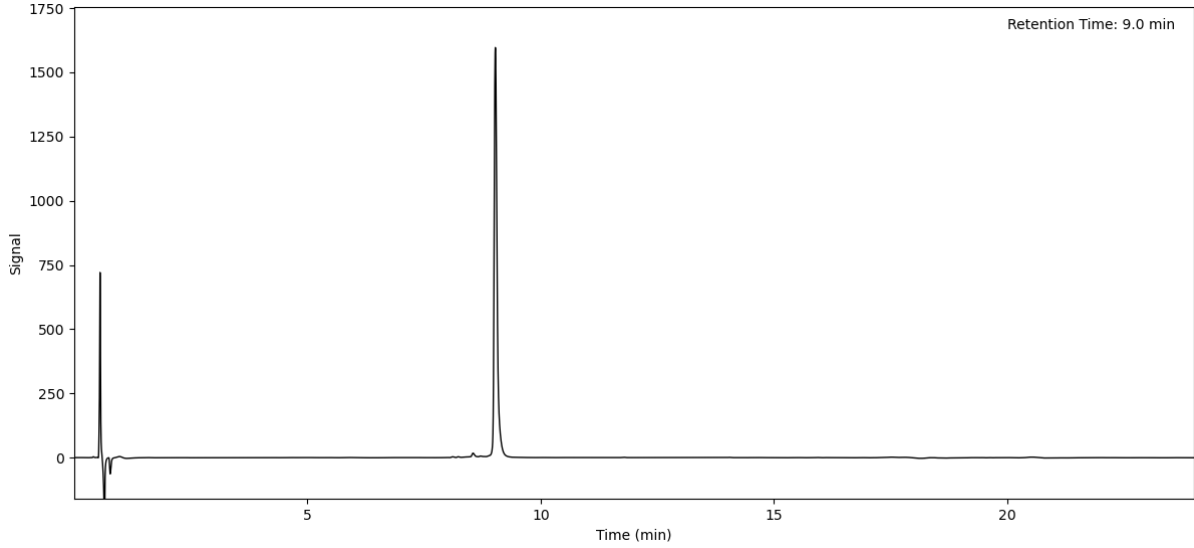

**Peptide 9 (Method A)**

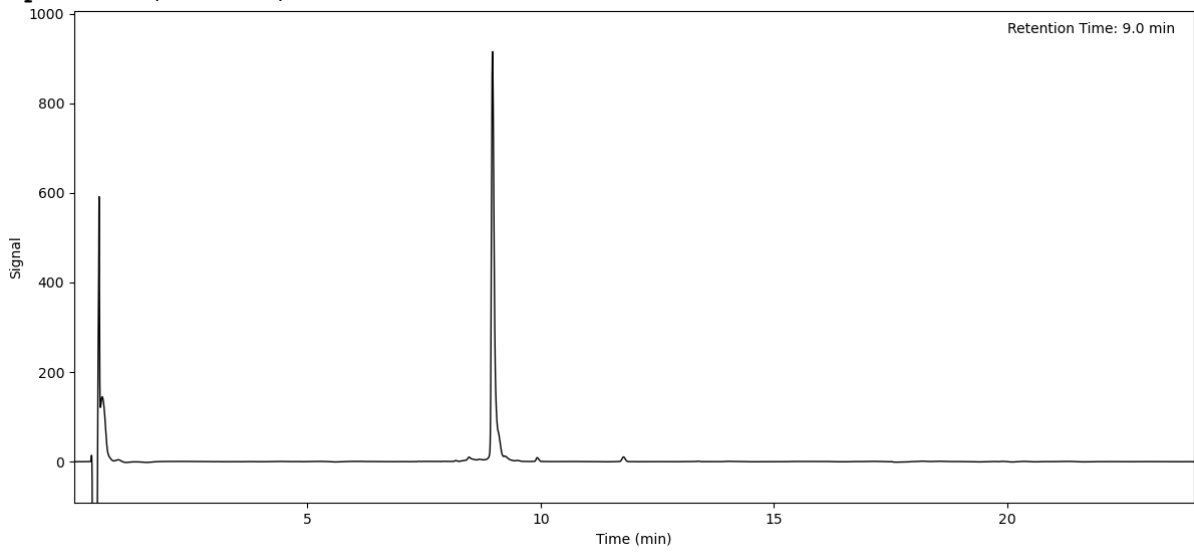

**Peptide 10 (Method A)**

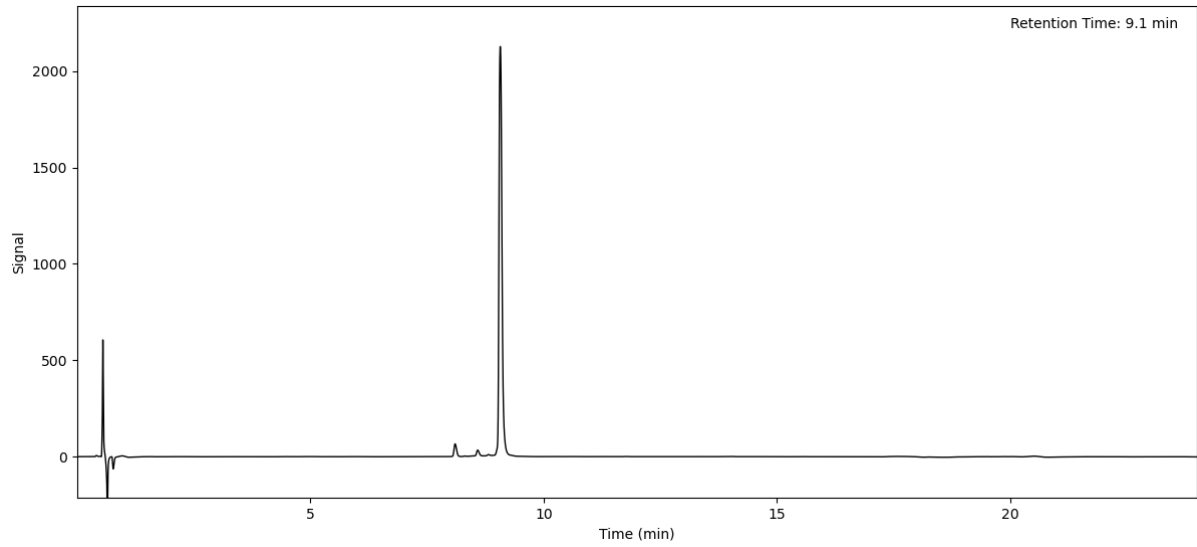

**Peptide 11 (Method A)**

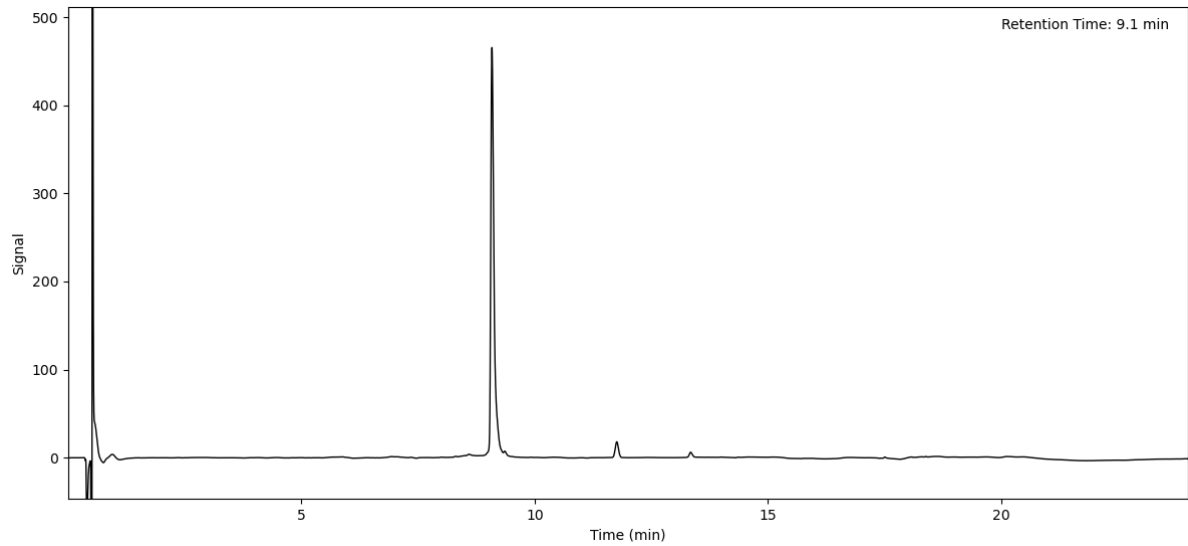

**Peptide 12 (Method A)**

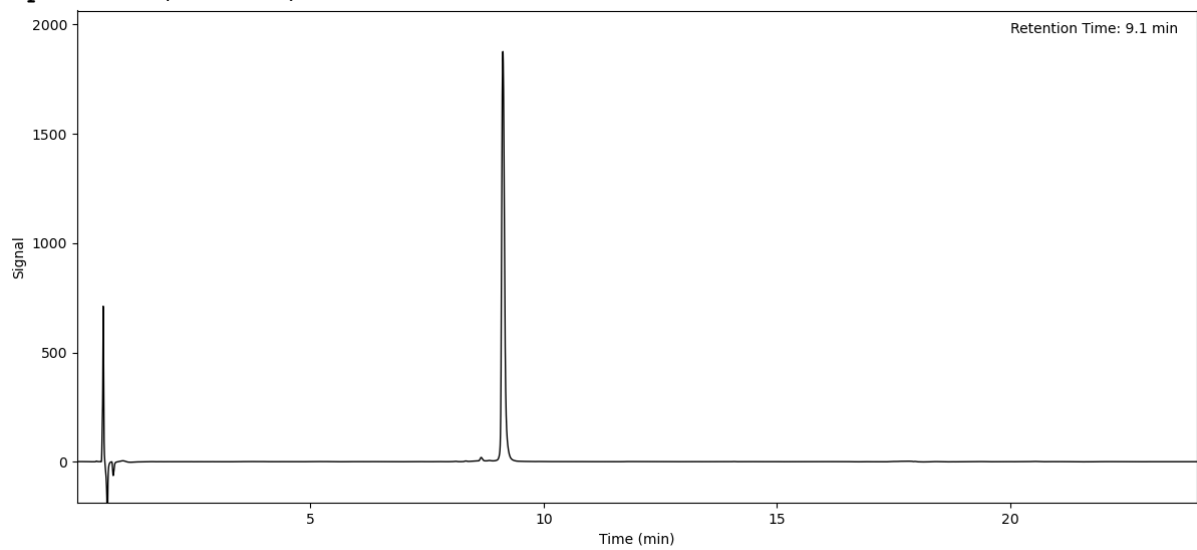

**Peptide 13 (Method A)**

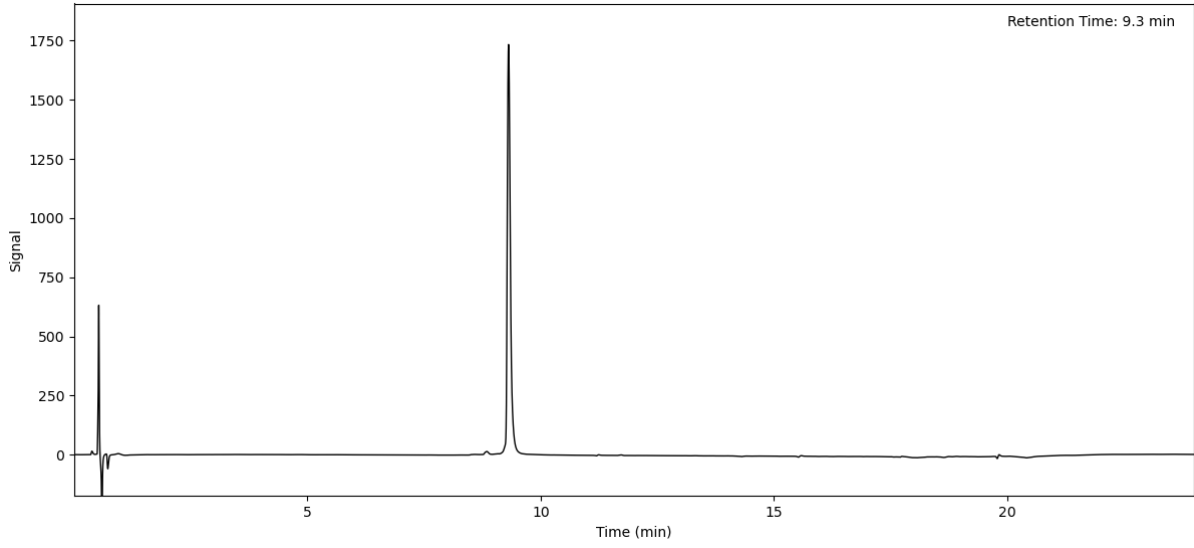

**Peptide 14 (Method A)**

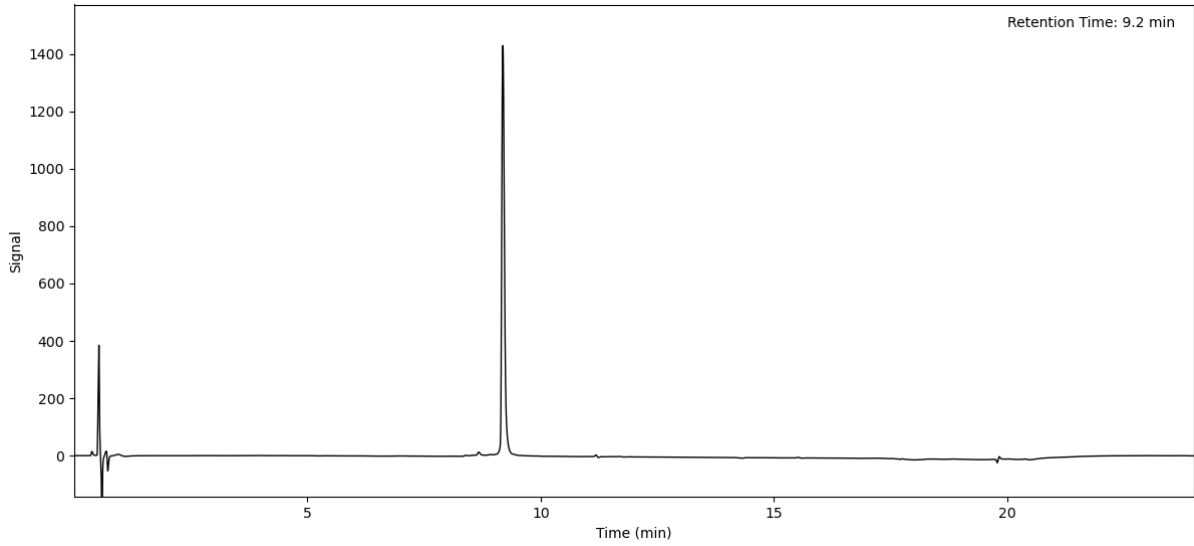

**Peptide 15 isomer 1 (Method A)**

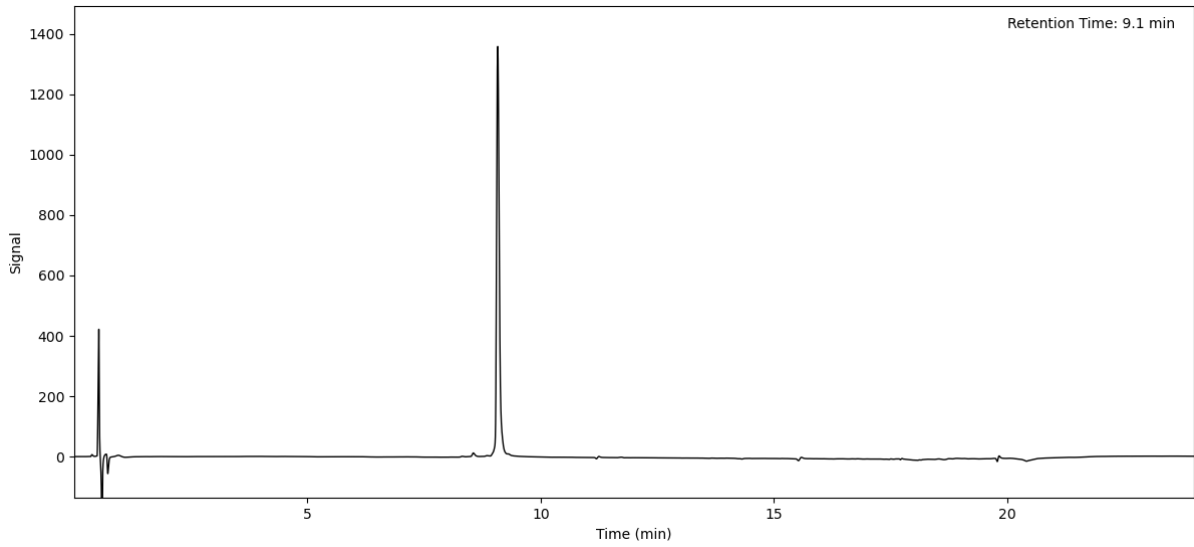

Peptide 15 isomer 2 (Method A)

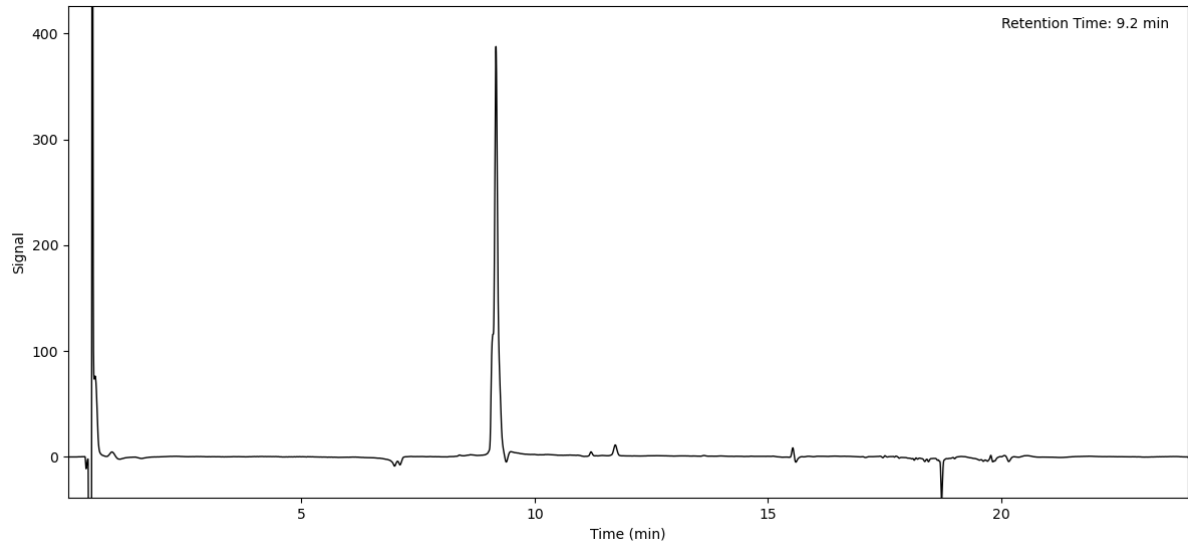

Peptide 16 (Method A)

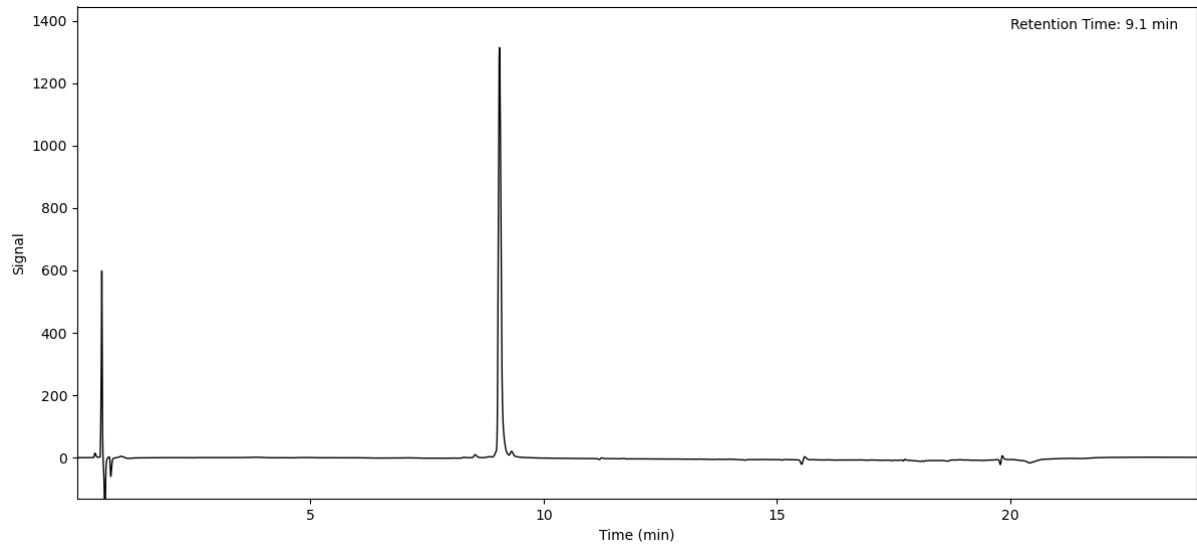

Peptide 17 (Method A)

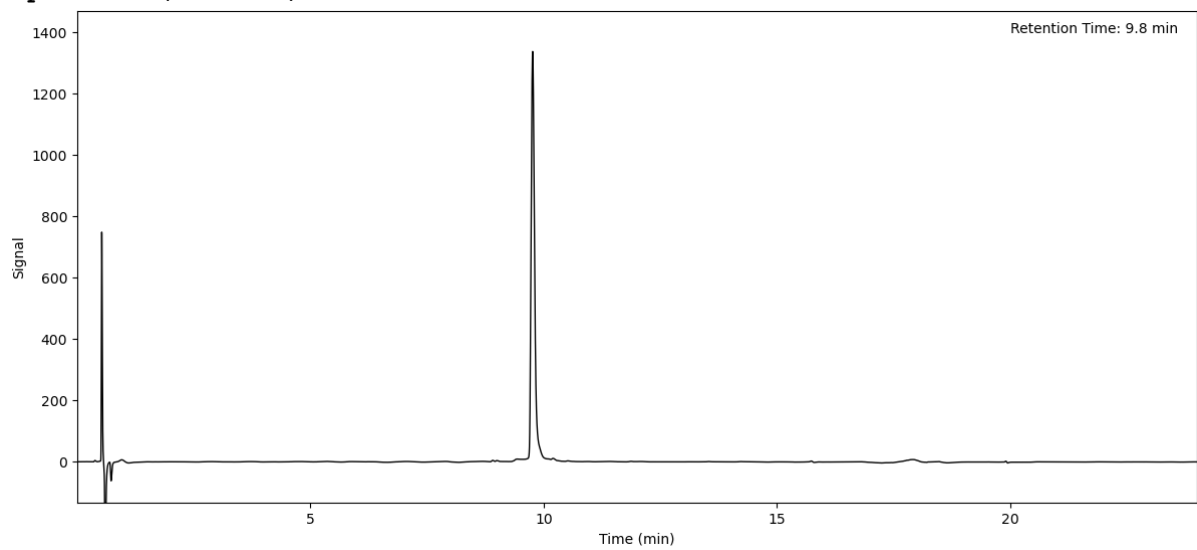

Peptide 18 isomer 1 (Method A)

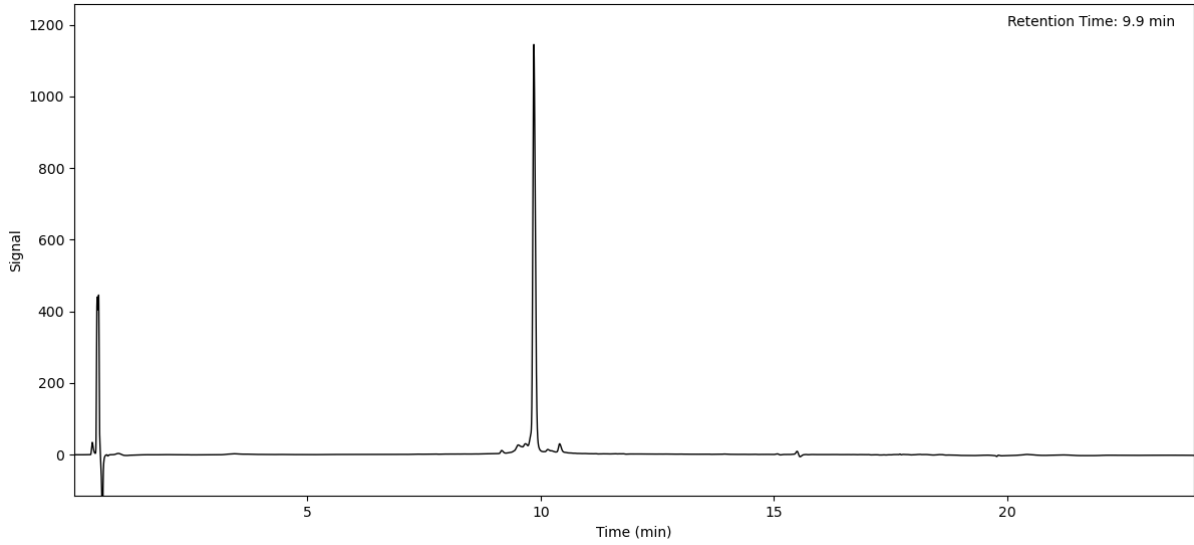

Peptide 18 isomer 2 (Method A)

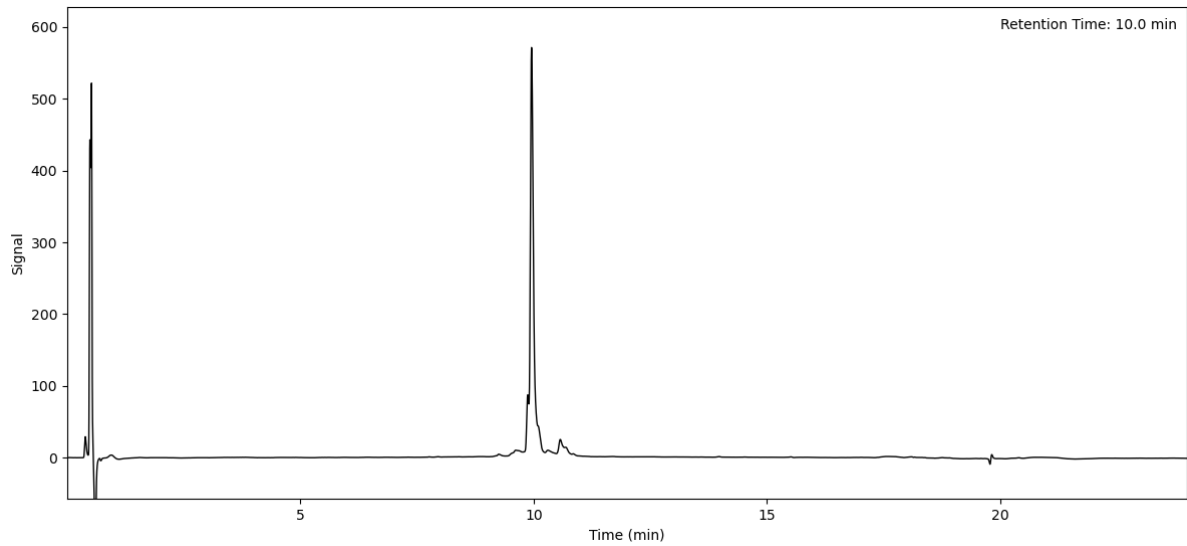

Peptide 19 (Method A)

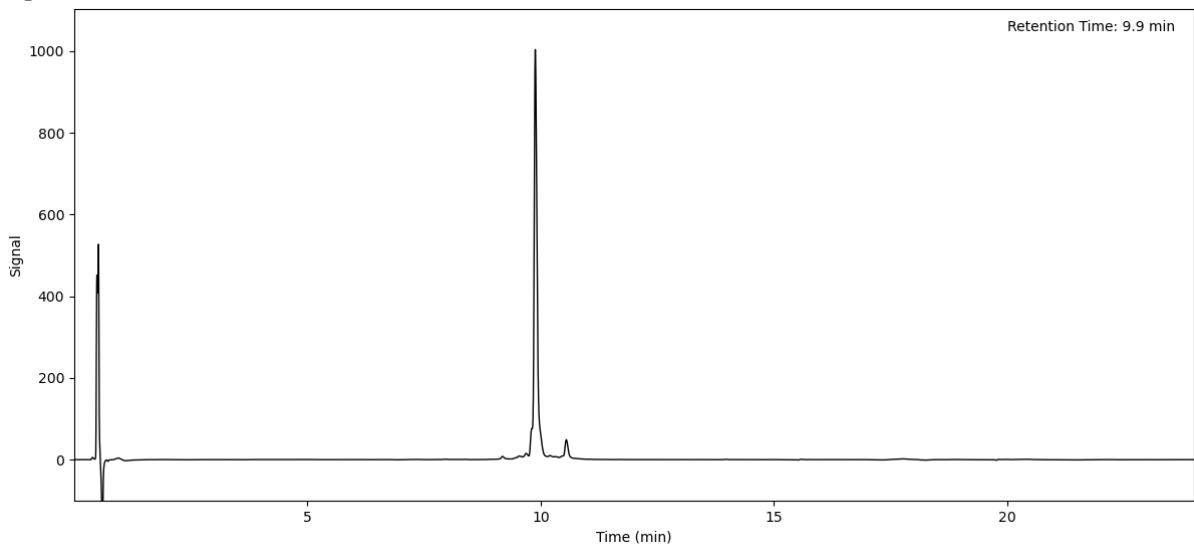



**Peptide 20 (Method A)**

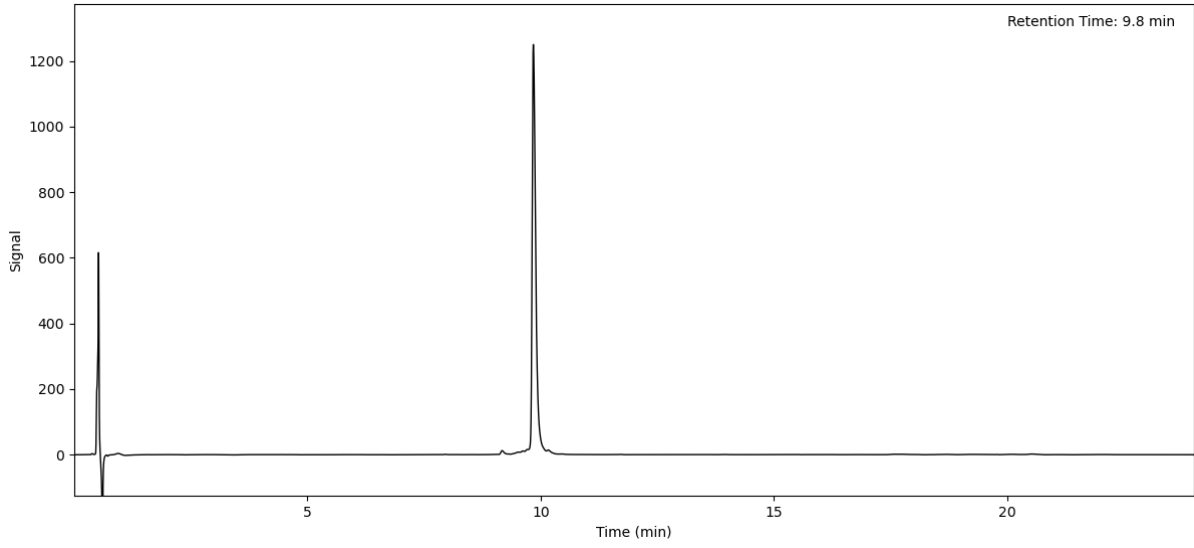

**Peptide 21 (Method A)**

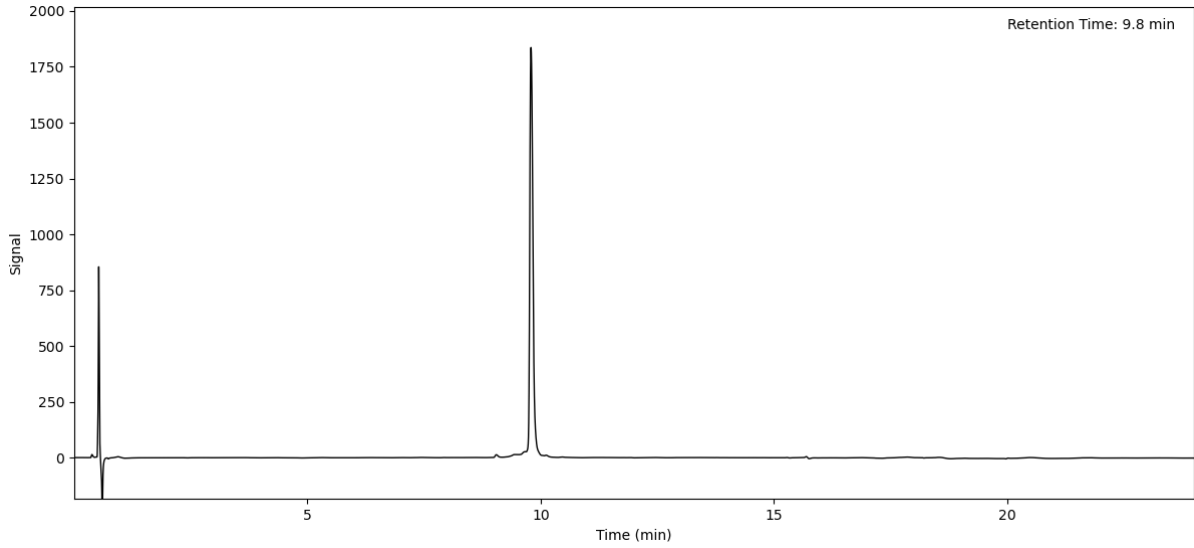

**Peptide 22 (Method A)**

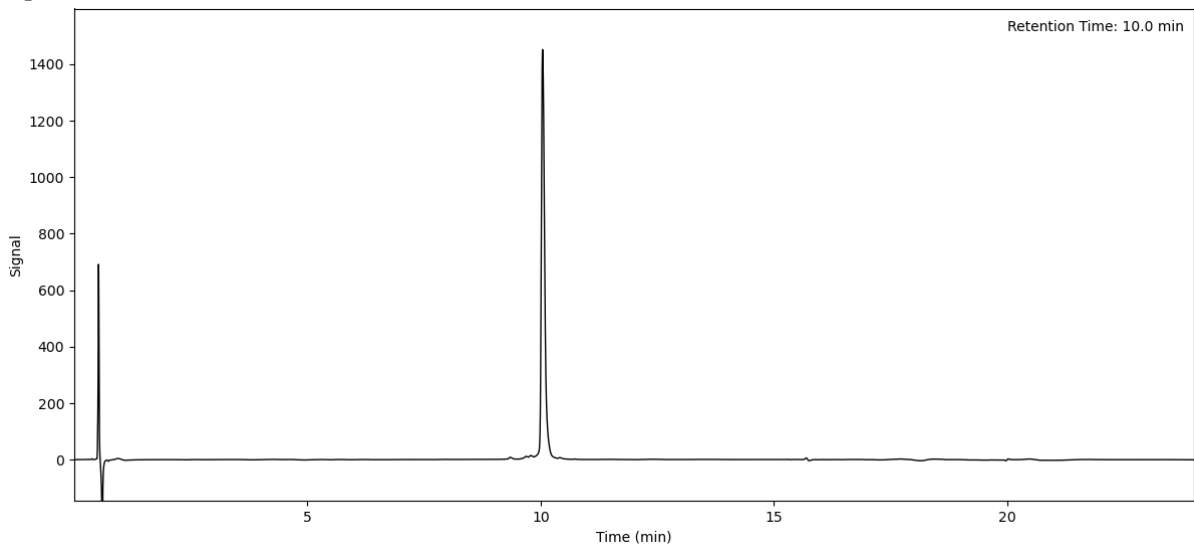

**Peptide 23 (Method A)**

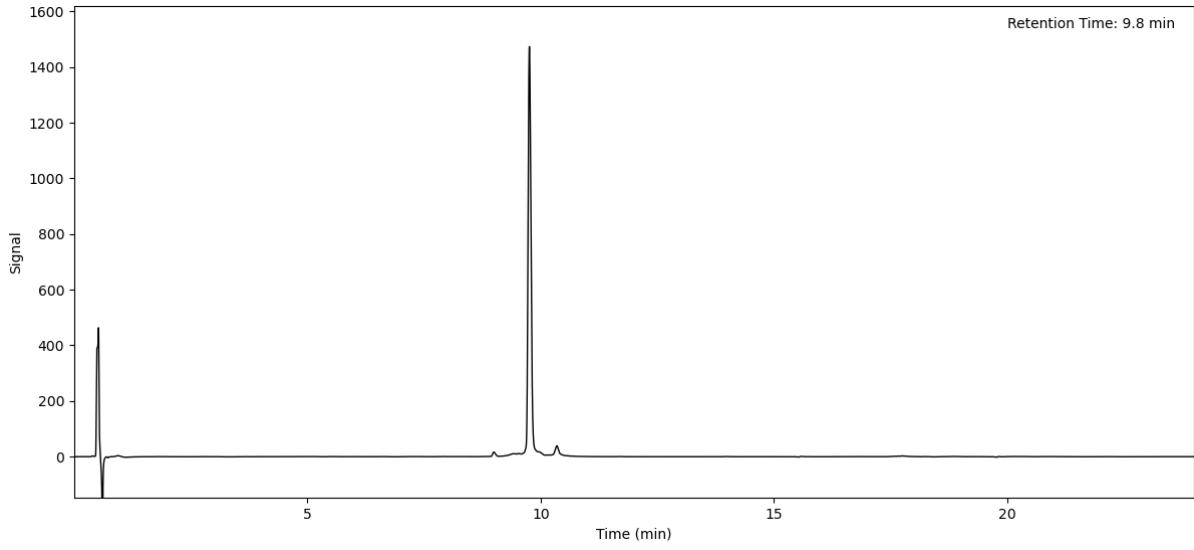

**Peptide 24 (Method A)**

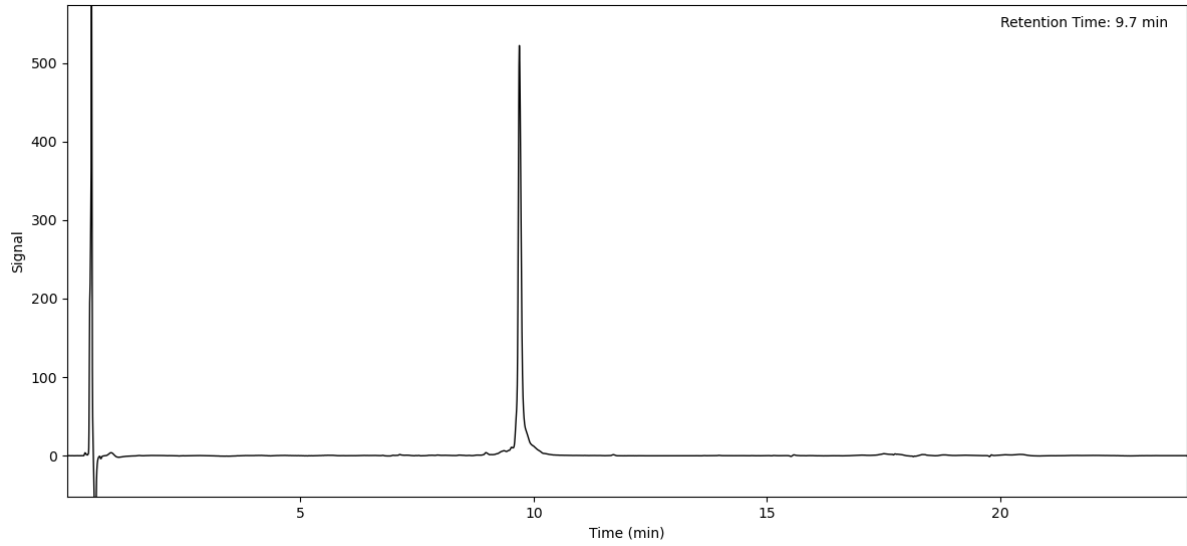

**Peptide 25 (Method A)**

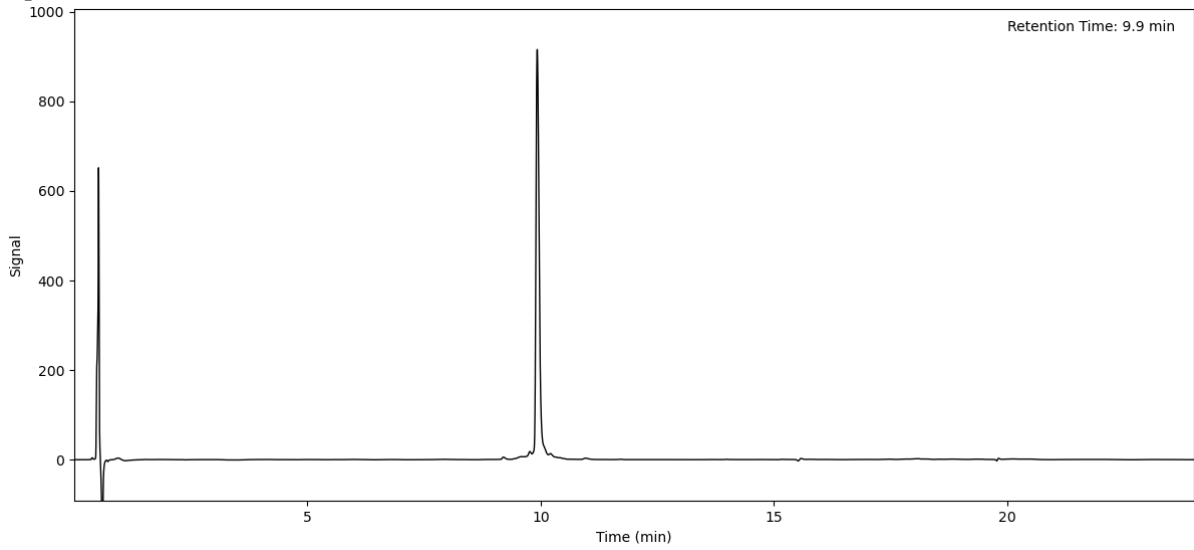

Peptide 26 (Method A)

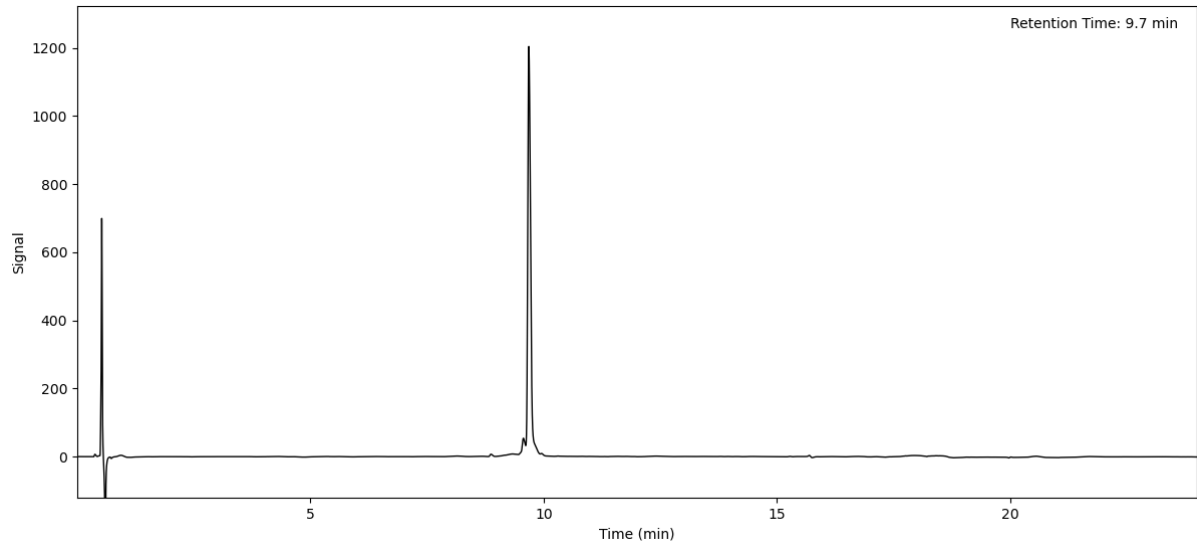

Peptide 27 (Method A)

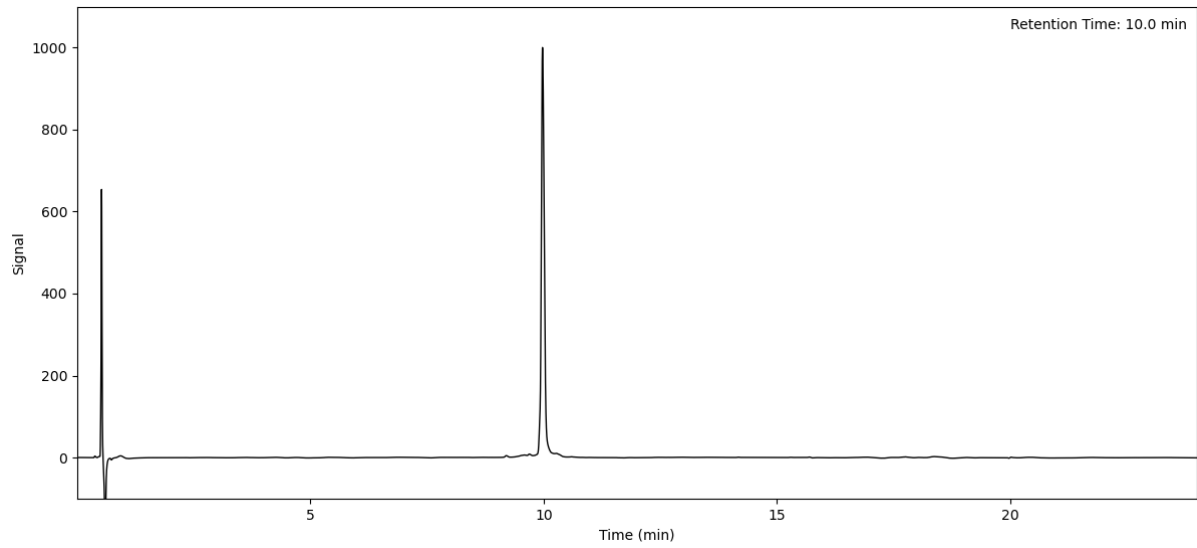

Peptide 28 (Method A)

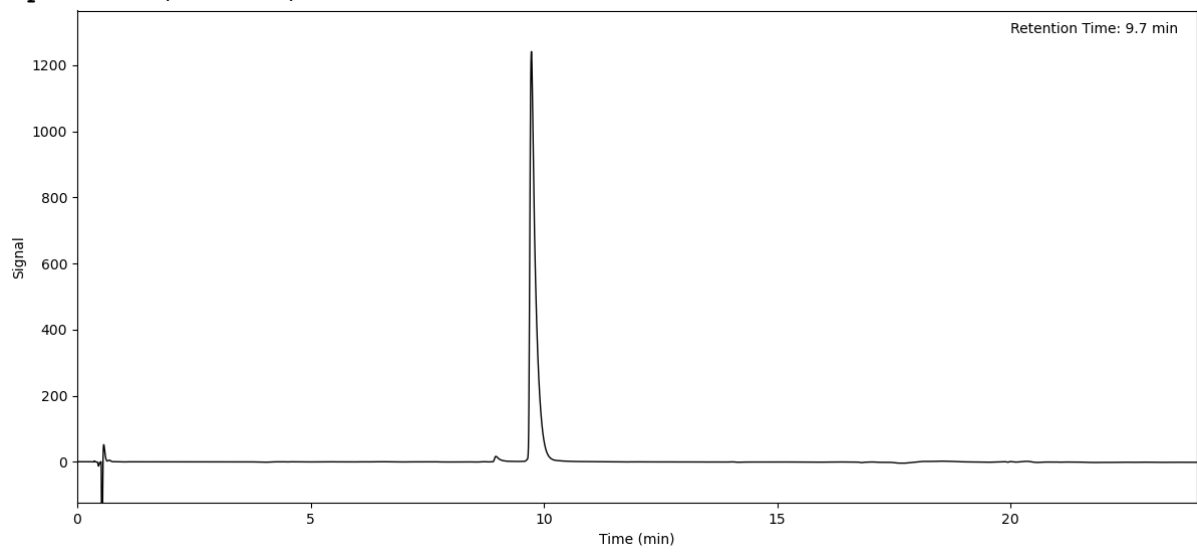

**Peptide 29 (Method A)**

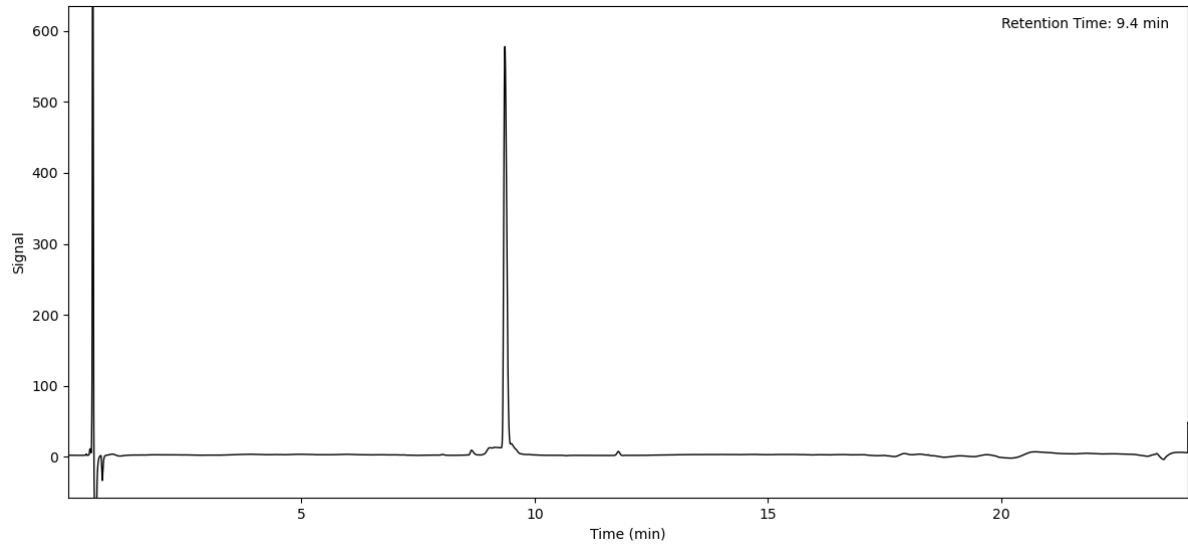

**Peptide 30 (Method A)**

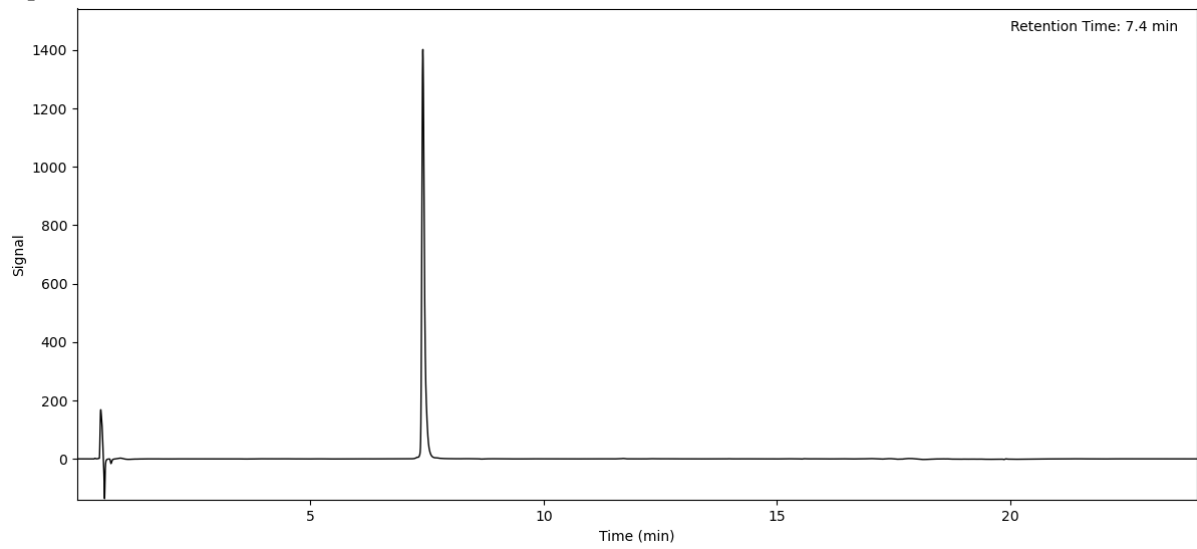

**Peptide 31 (Method A)**

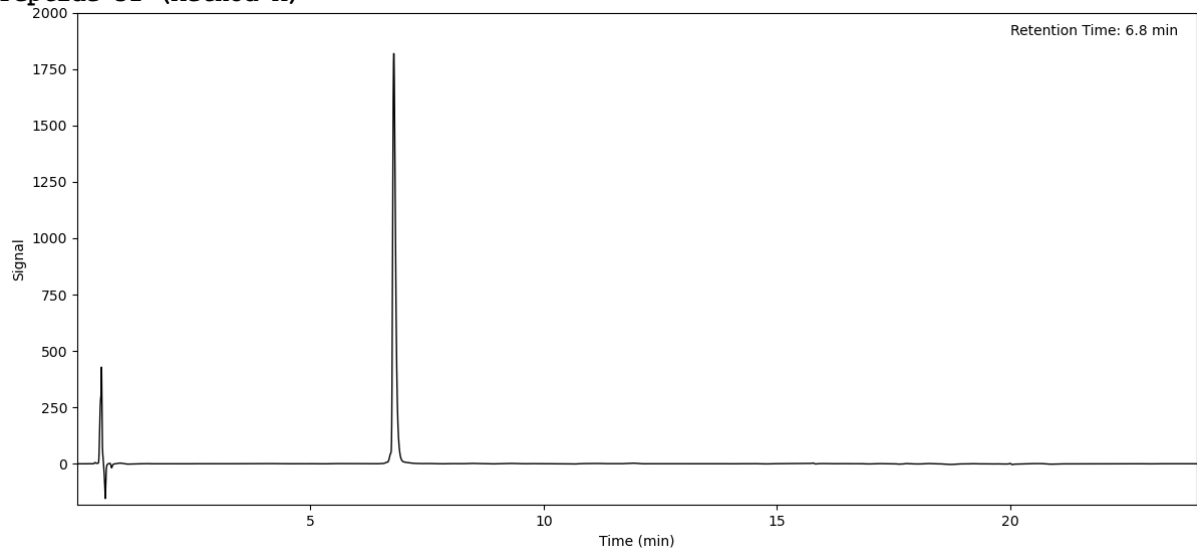

**Peptide 32 (Method A)**

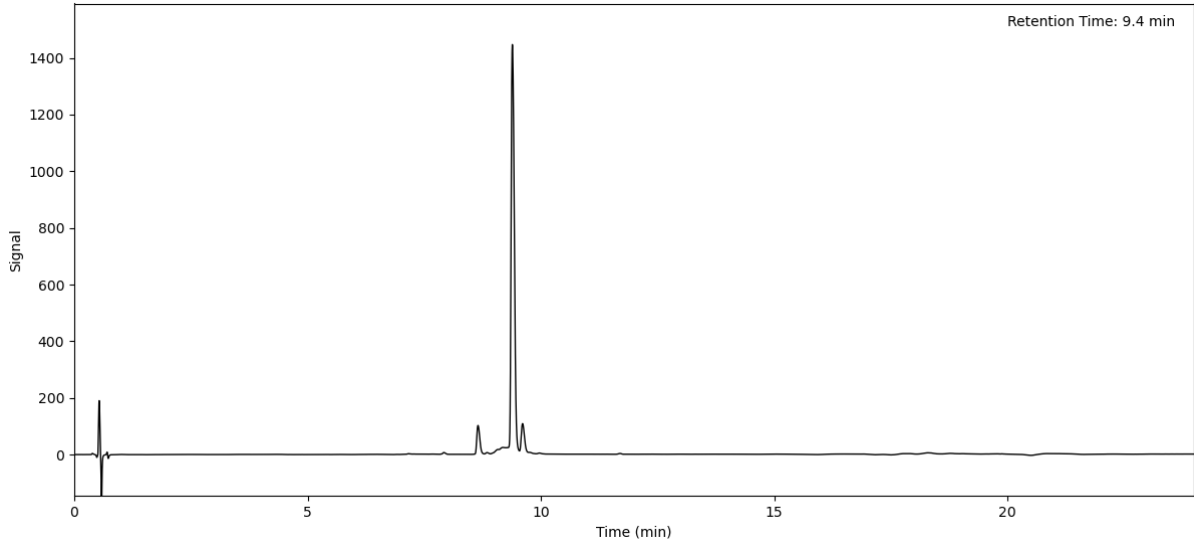

**Peptide 33 (Method A)**

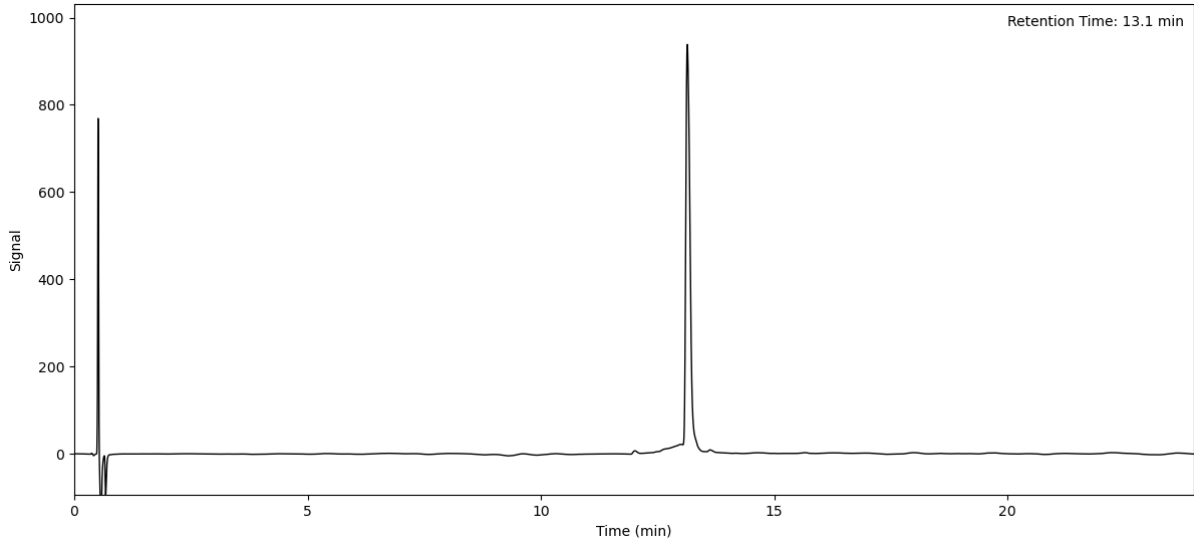

**Peptide 34 (Method A)**

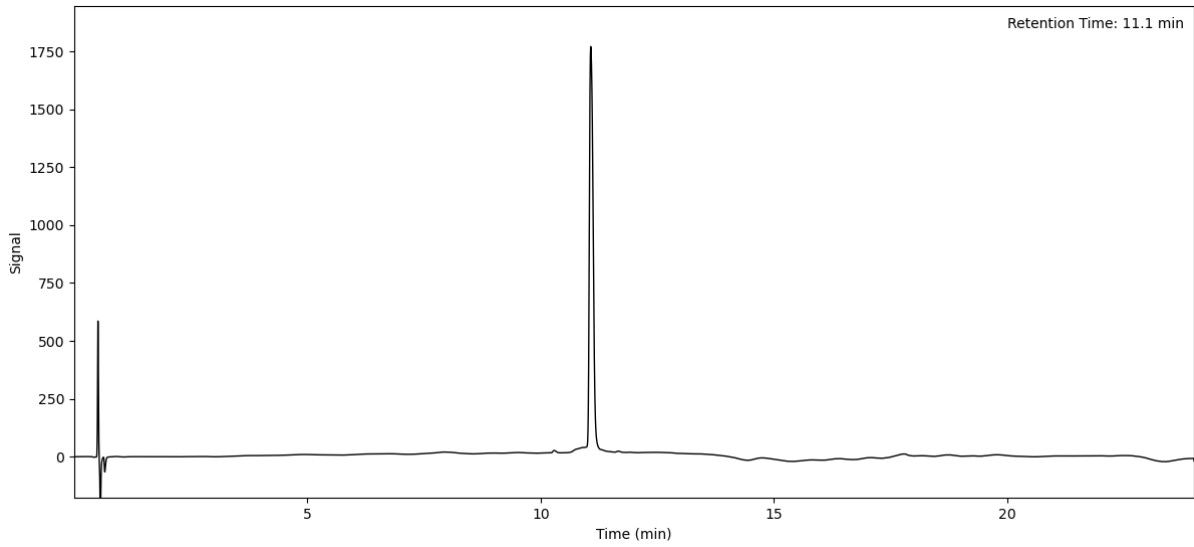

**Peptide 35 (Method A)**

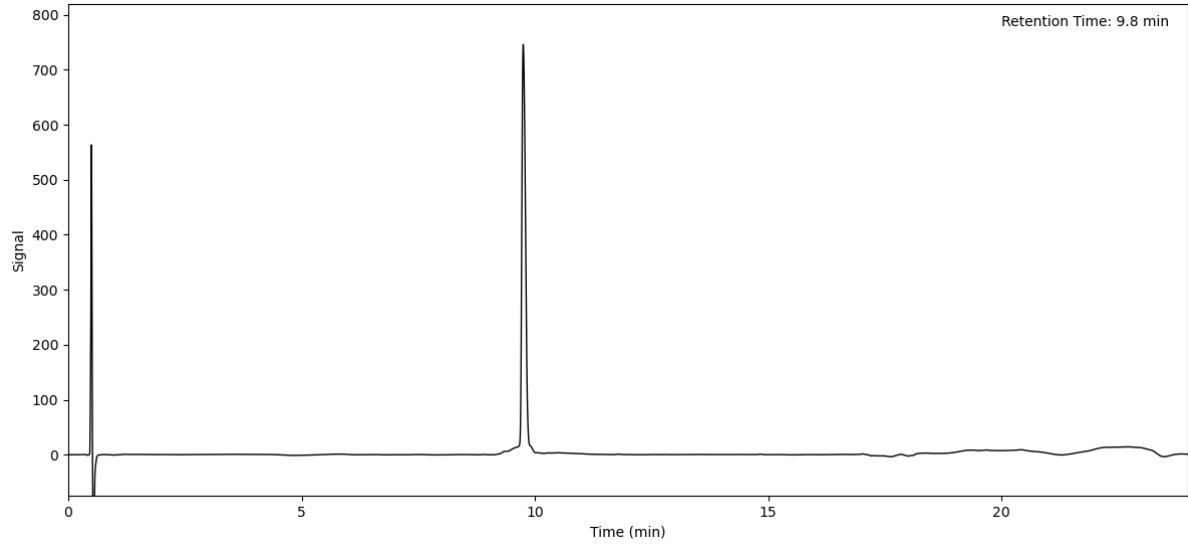

**Peptide 36 (Method A)**

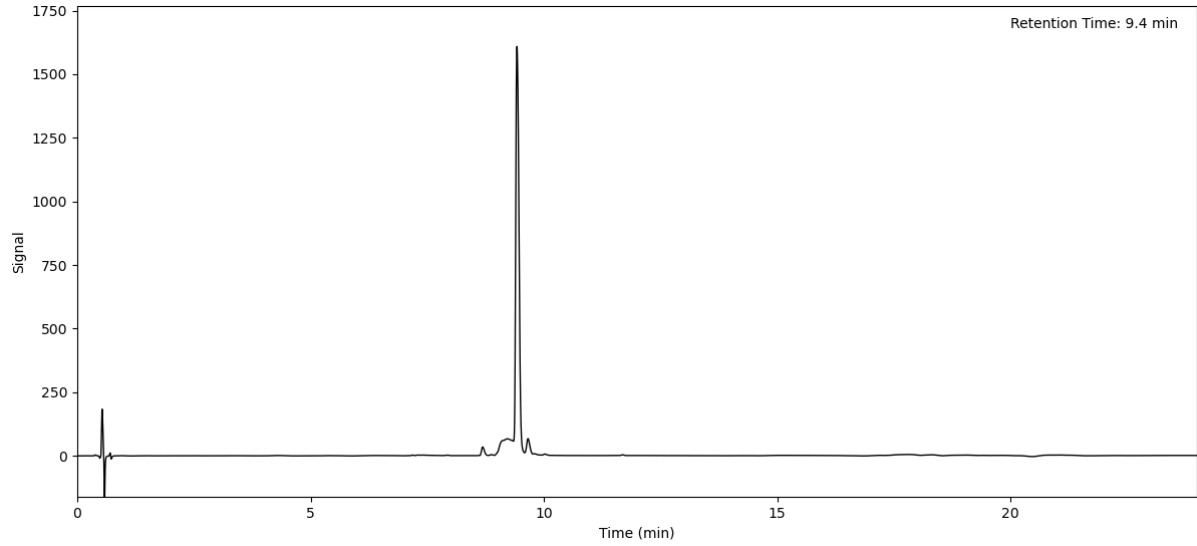

**Peptide 37 (Method A)**

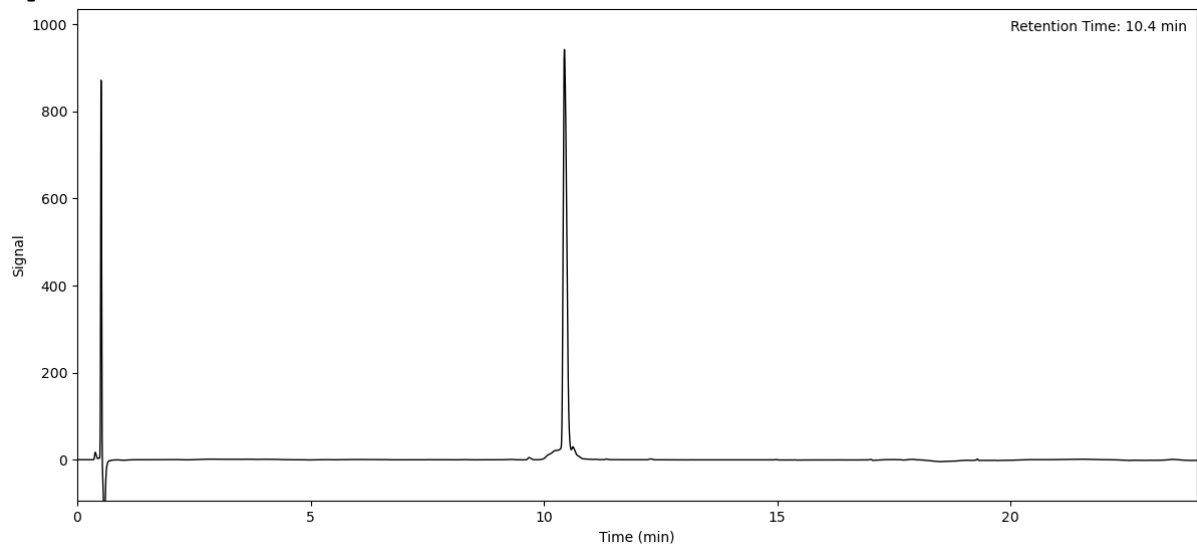

**Peptide 38 (Method A)**

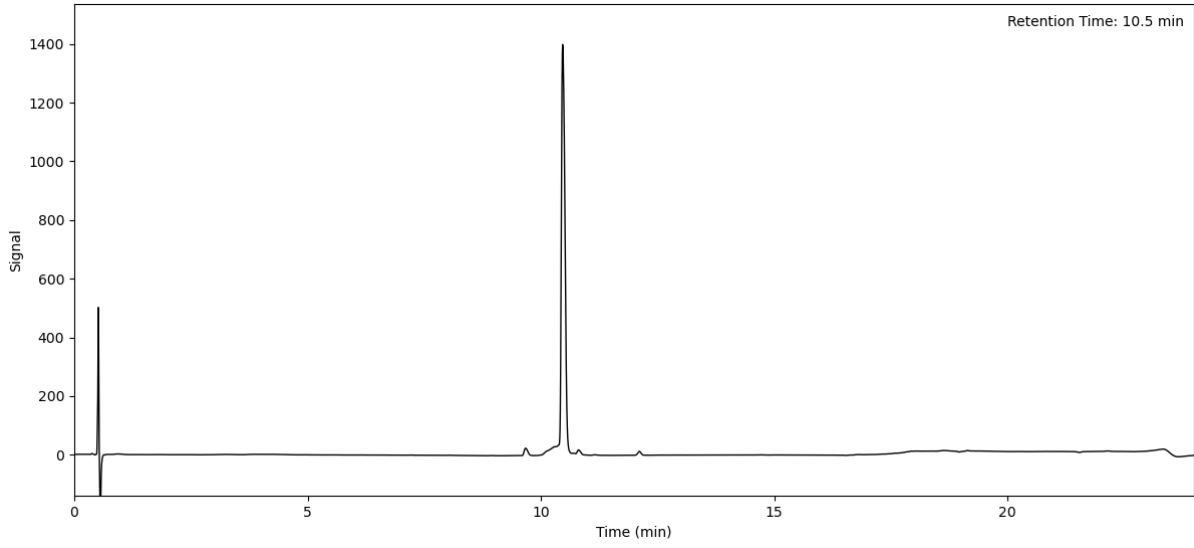

**Peptide 39 (Method A)**

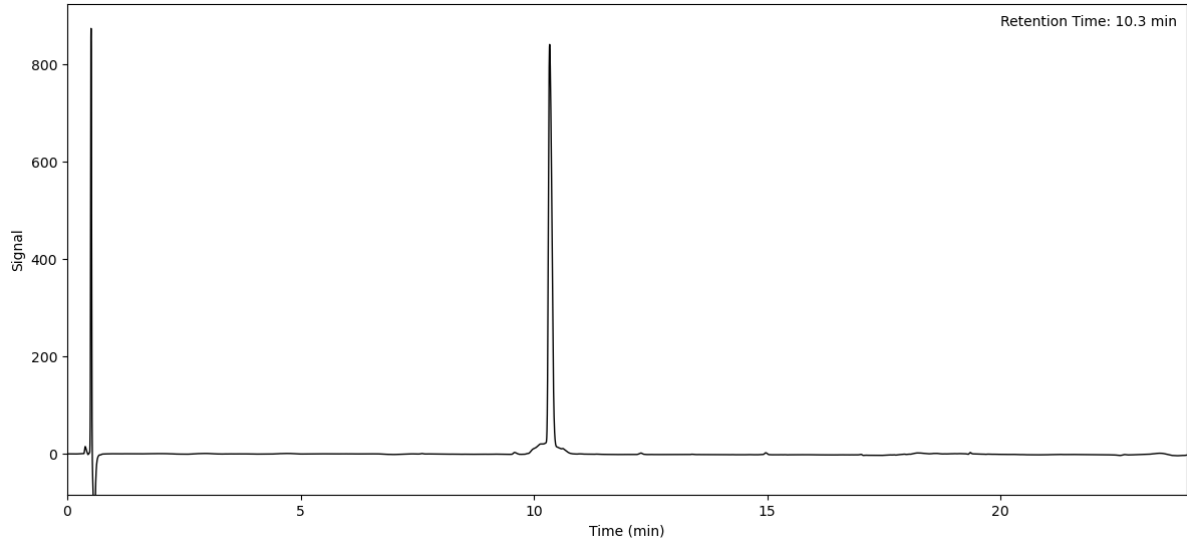

**Peptide 40 (Method A)**

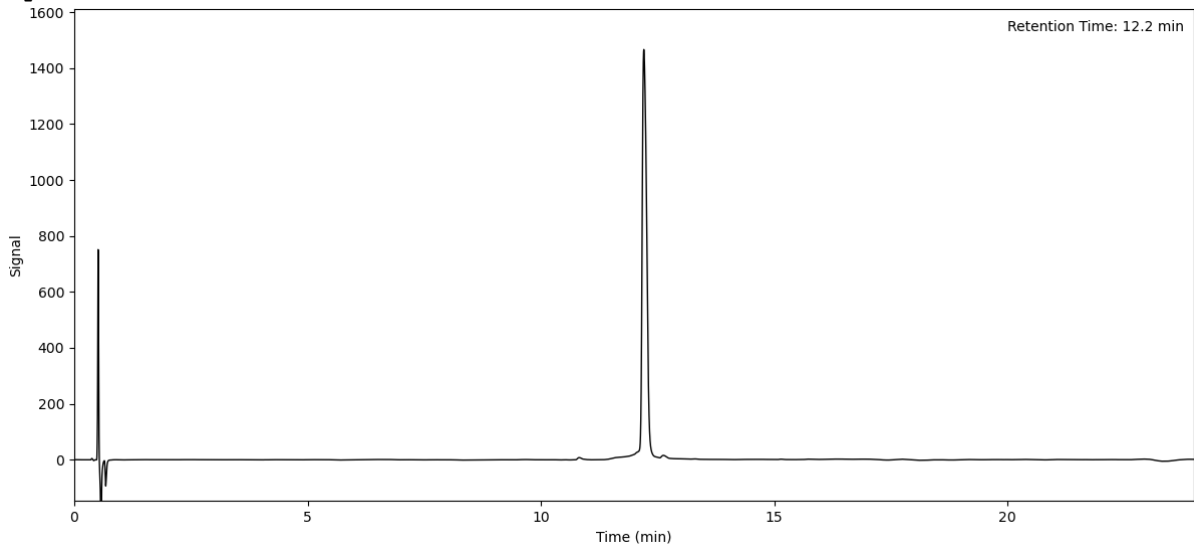

**Peptide 41 (Method A)**

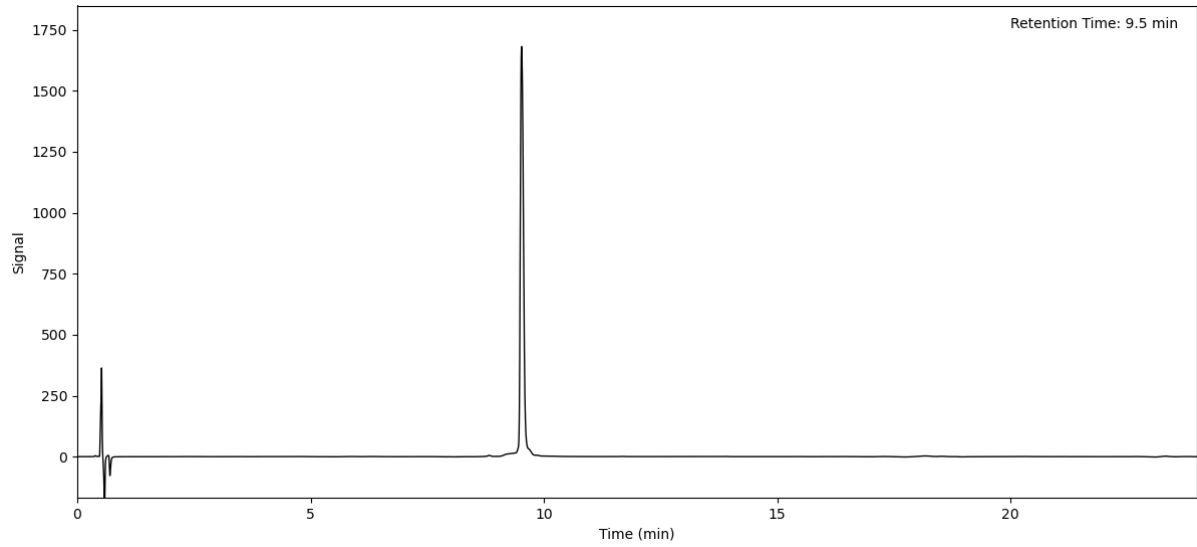

**Peptide 42 (Method A)**

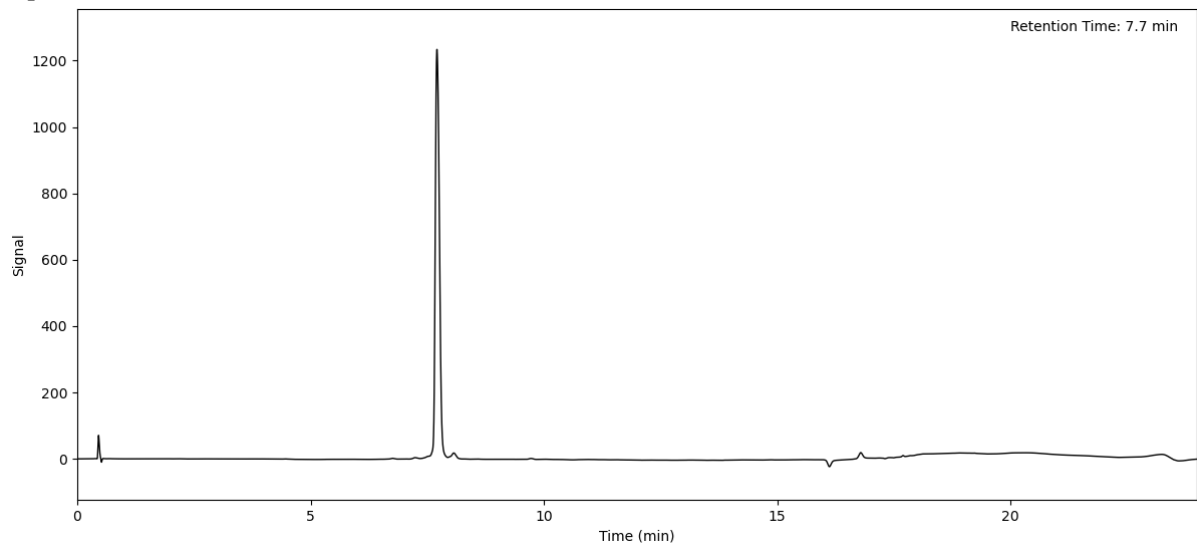

**Peptide 43 (Method A)**

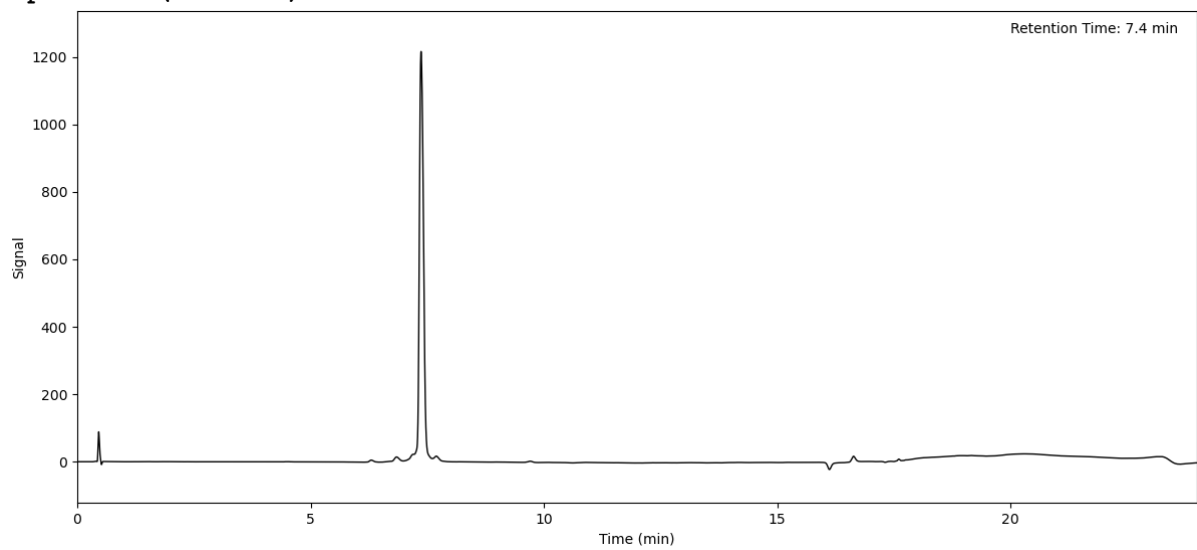



**Peptide 44 (Method A)**

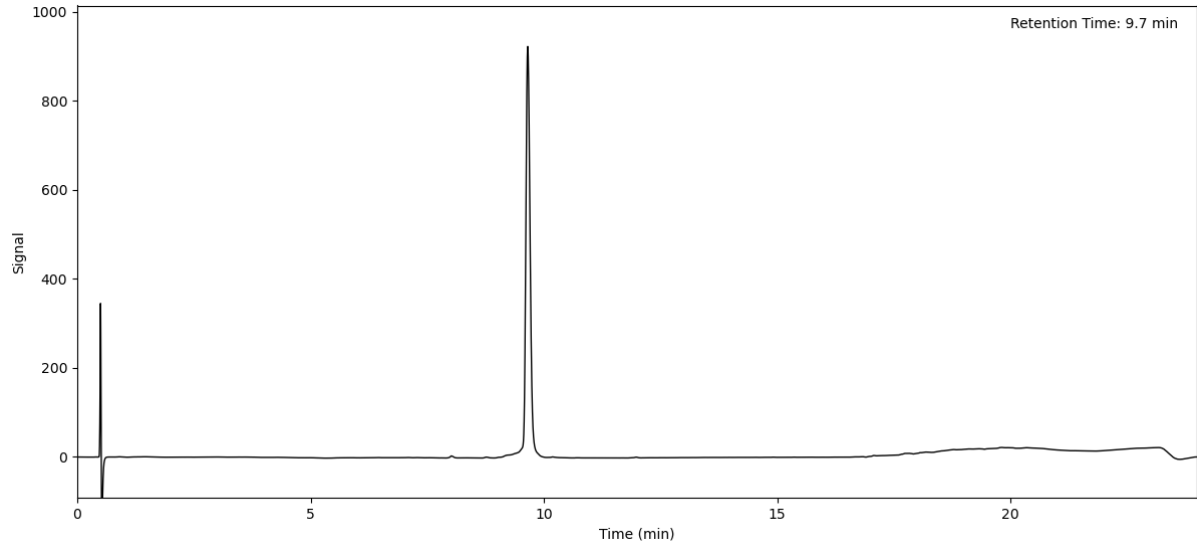

**Peptide 45 (Method A)**

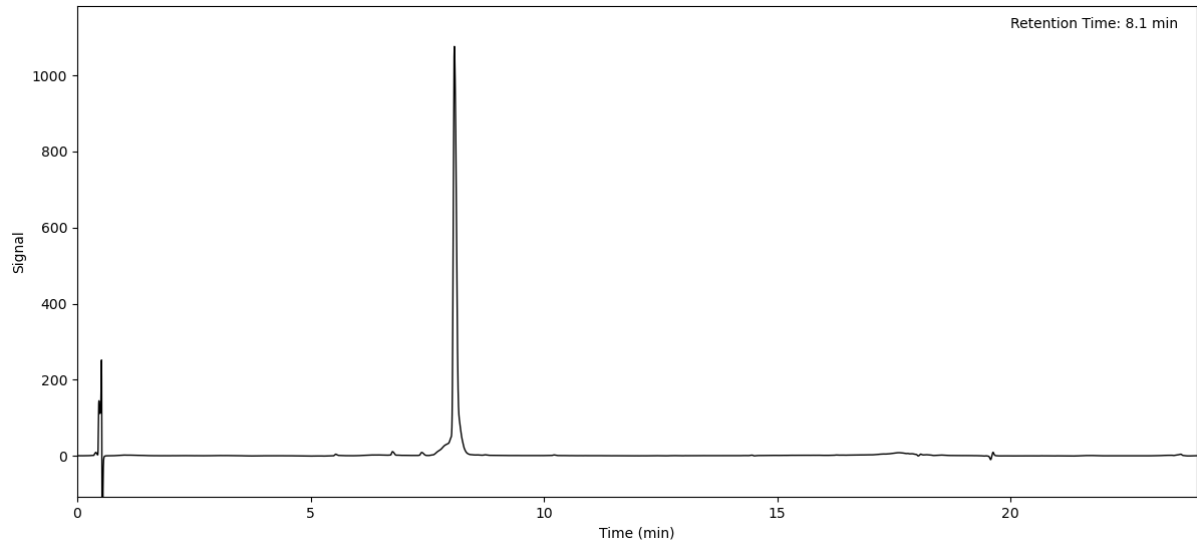

**Peptide 46 (Method A)**

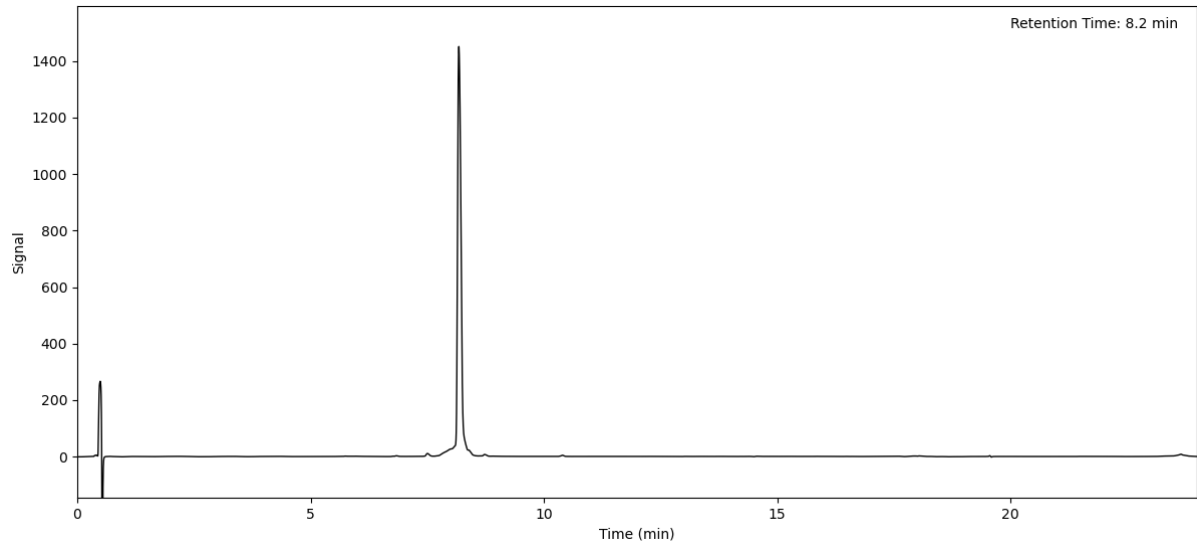

**Peptide 47 (Method A)**

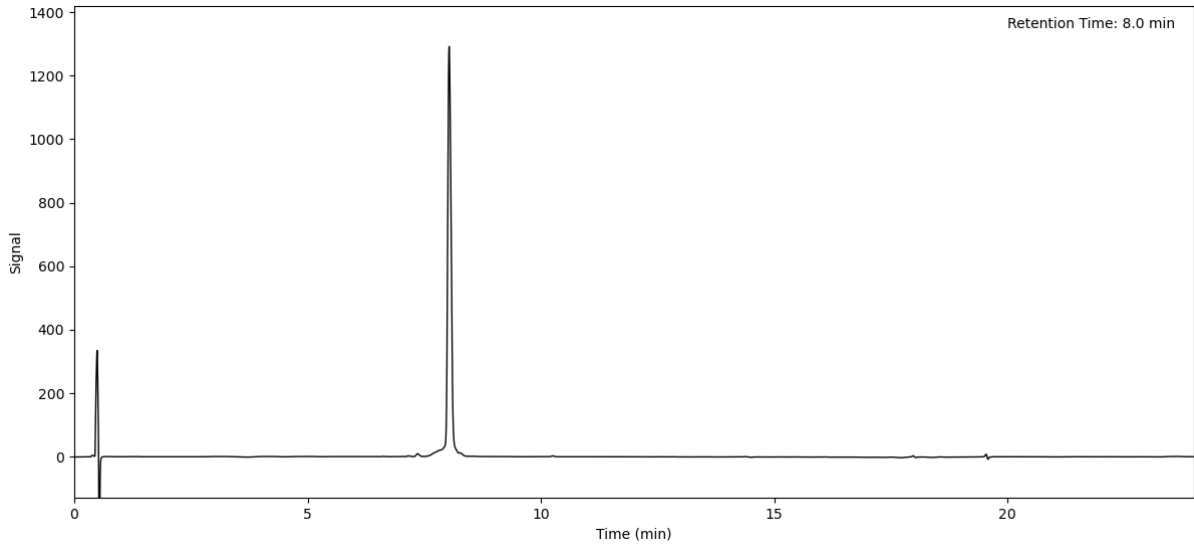

**Peptide 48 (Method A)**

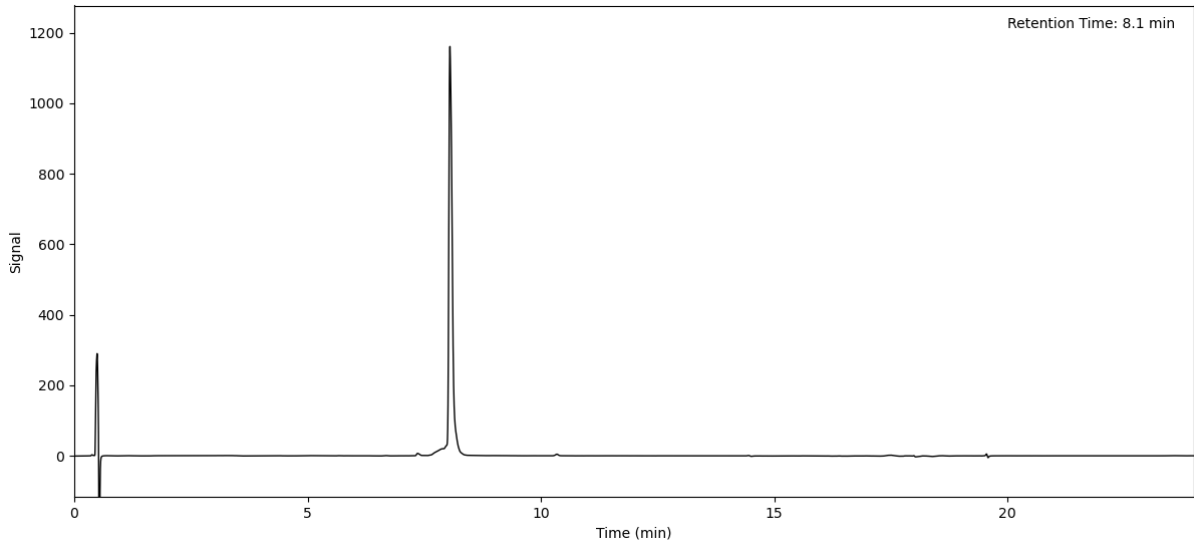

**Peptide 49 (Method A)**

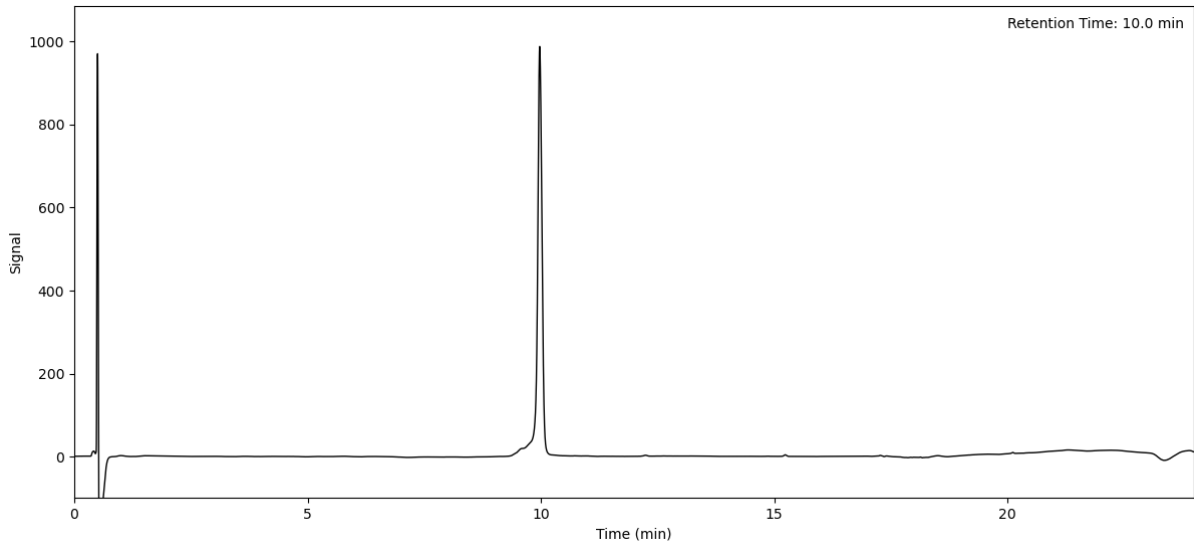

**Peptide 50 (Method B)**

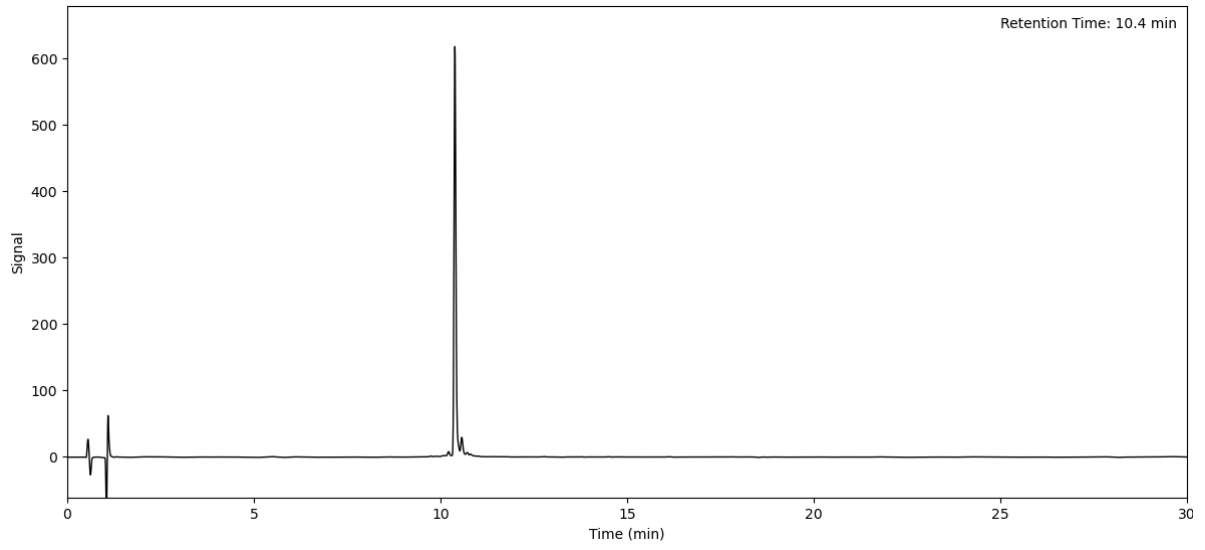

**Peptide 51 (Method A)**

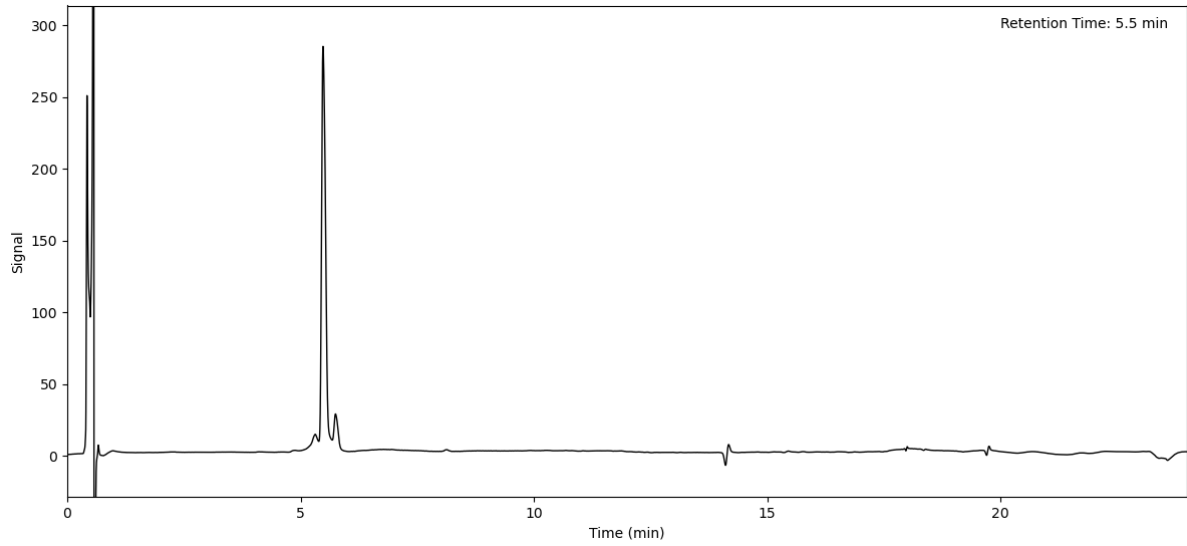

**Peptide 52 (Method B)**

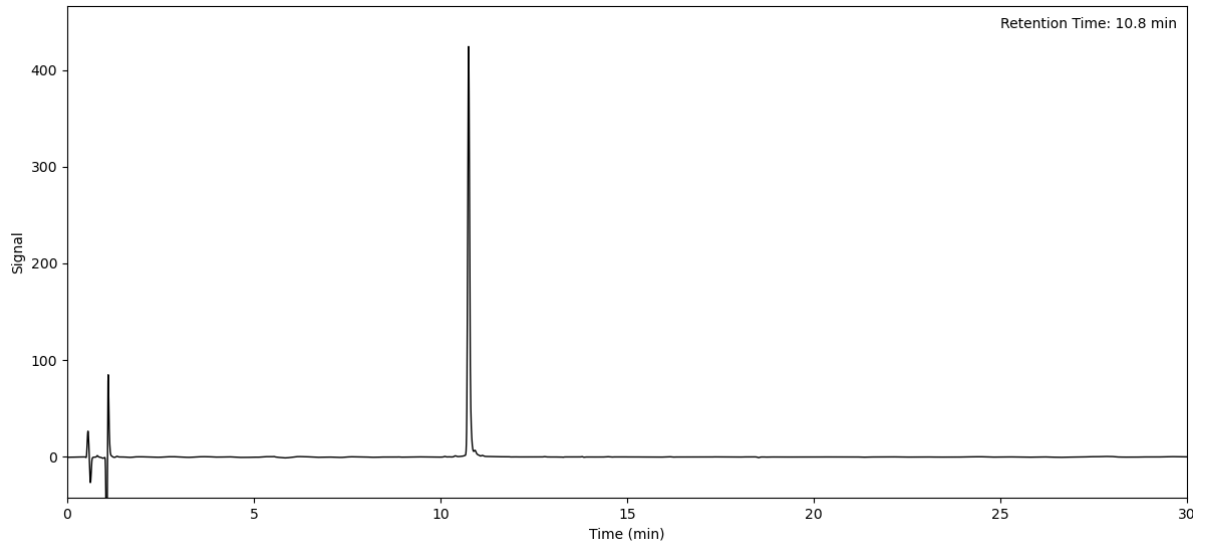

**Peptide 53 (Method B)**

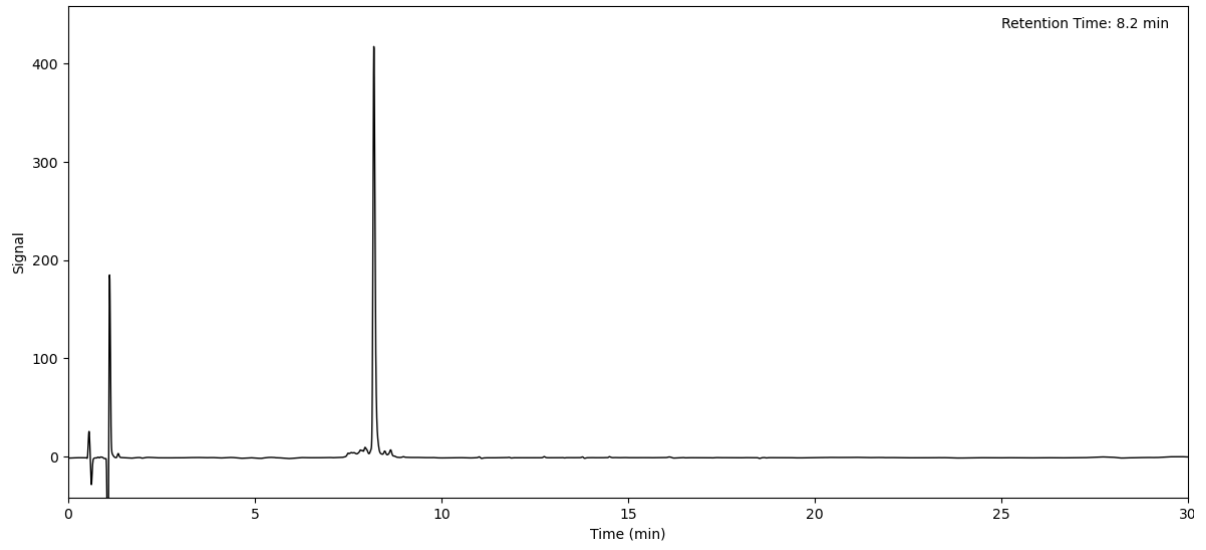

**Peptide 54 (Method B)**

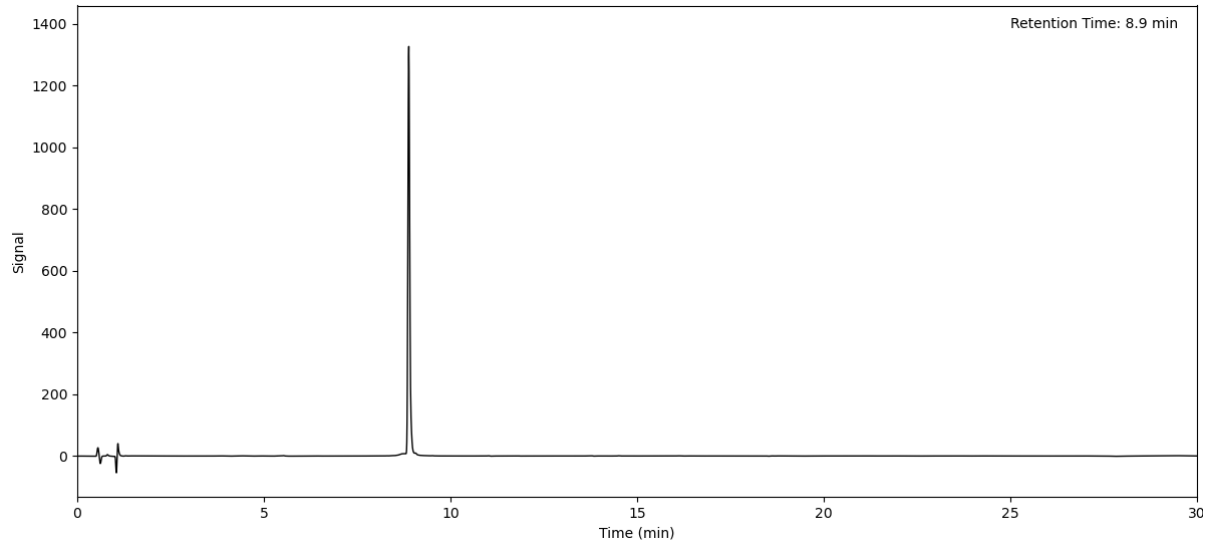

**Peptide 55 (Method B)**

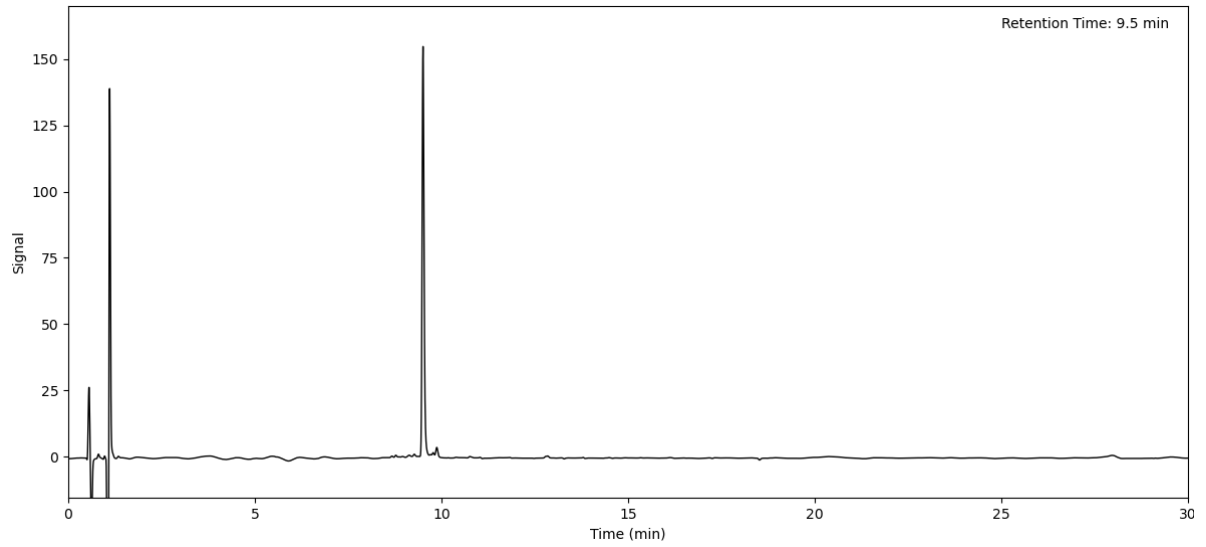

**Peptide 56 (Method B)**

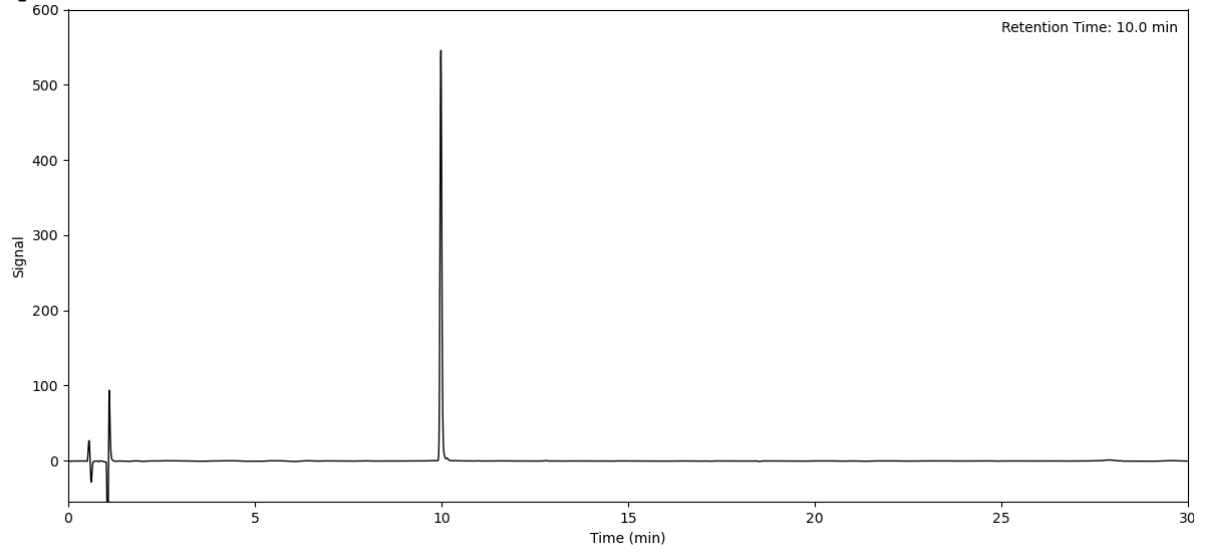

**Peptide S1 (Method A)**

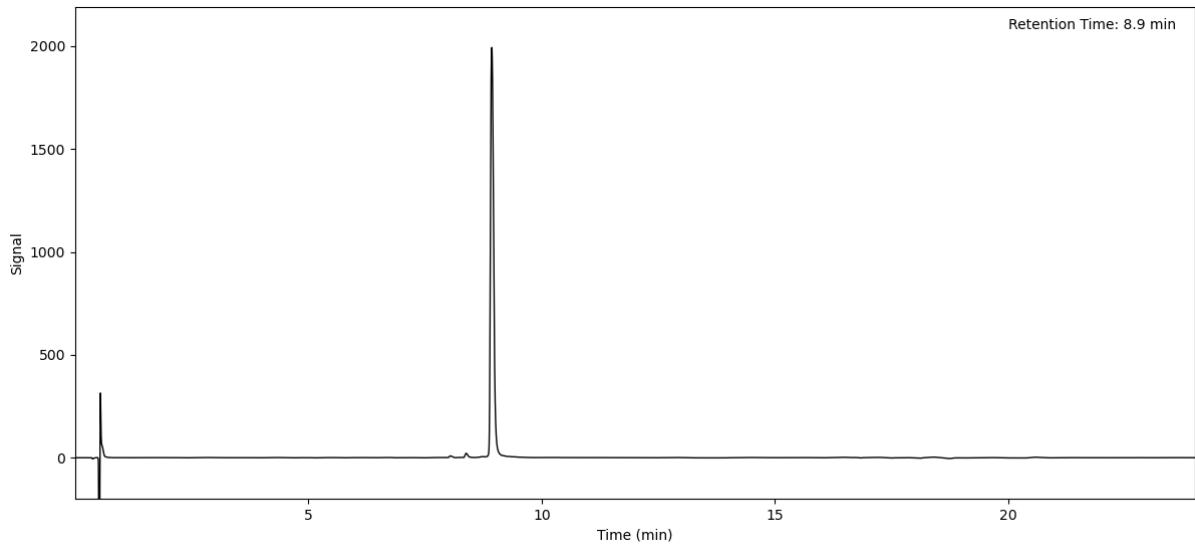

**Peptide S2 (Method A)**

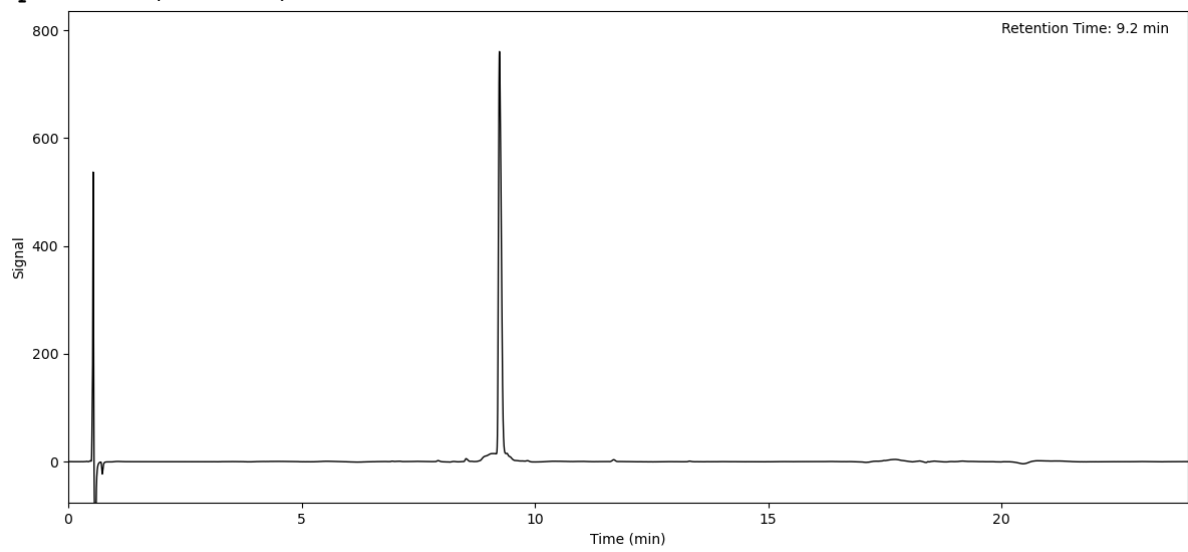

Peptide S3 (Method A)

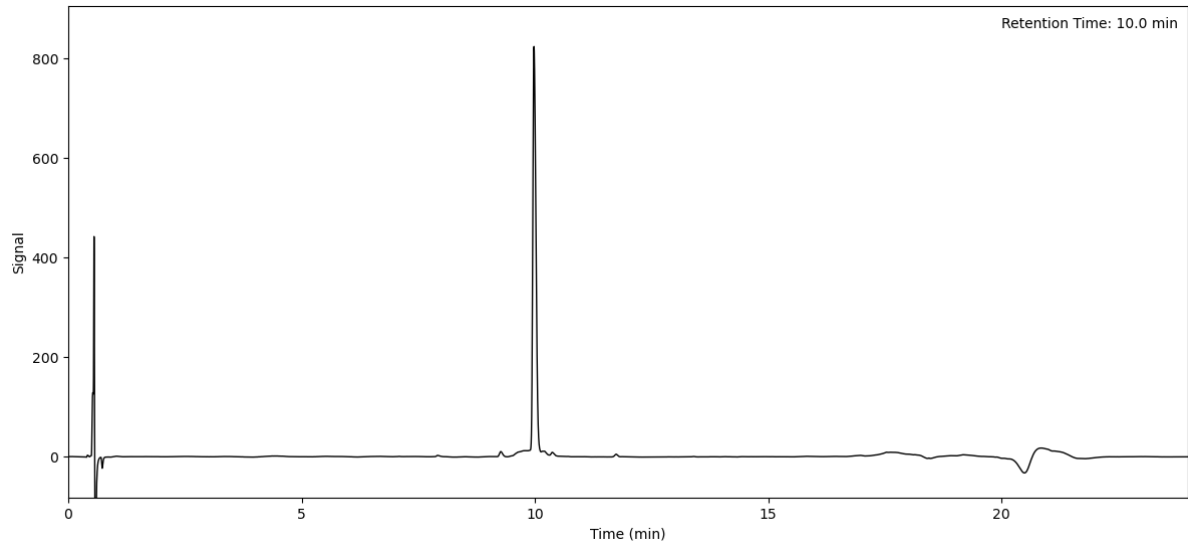

Peptide S4 (Method A)

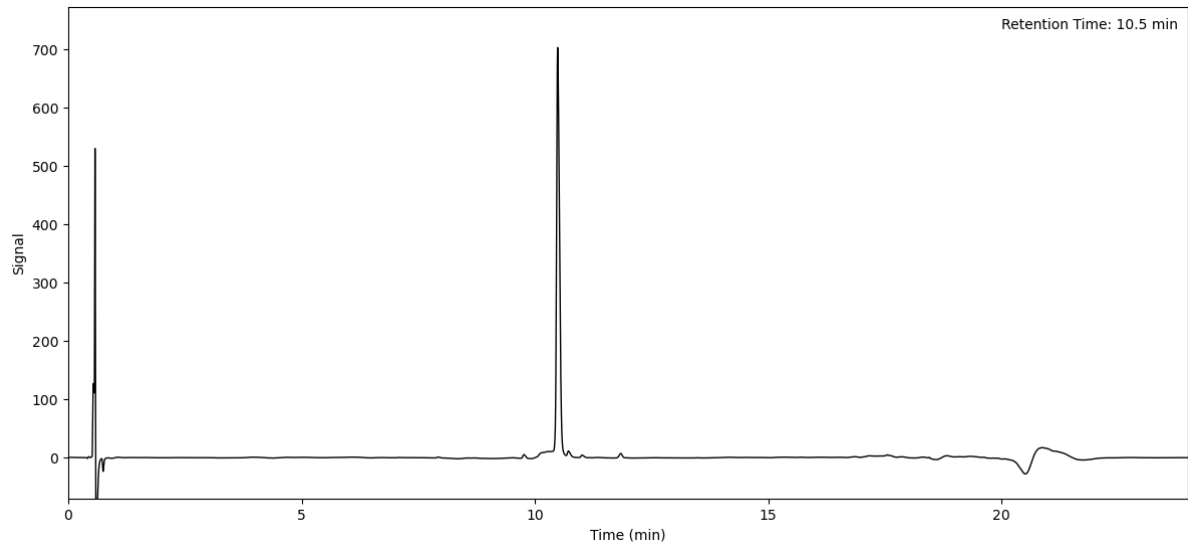

Peptide S5 (Method A)

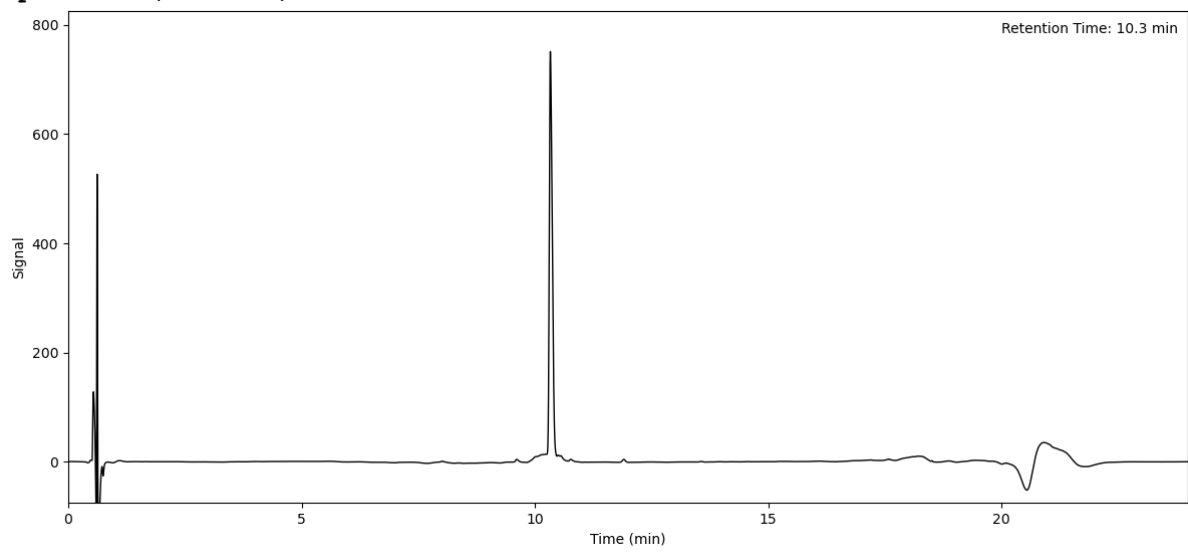

Peptide S6 (Method A)

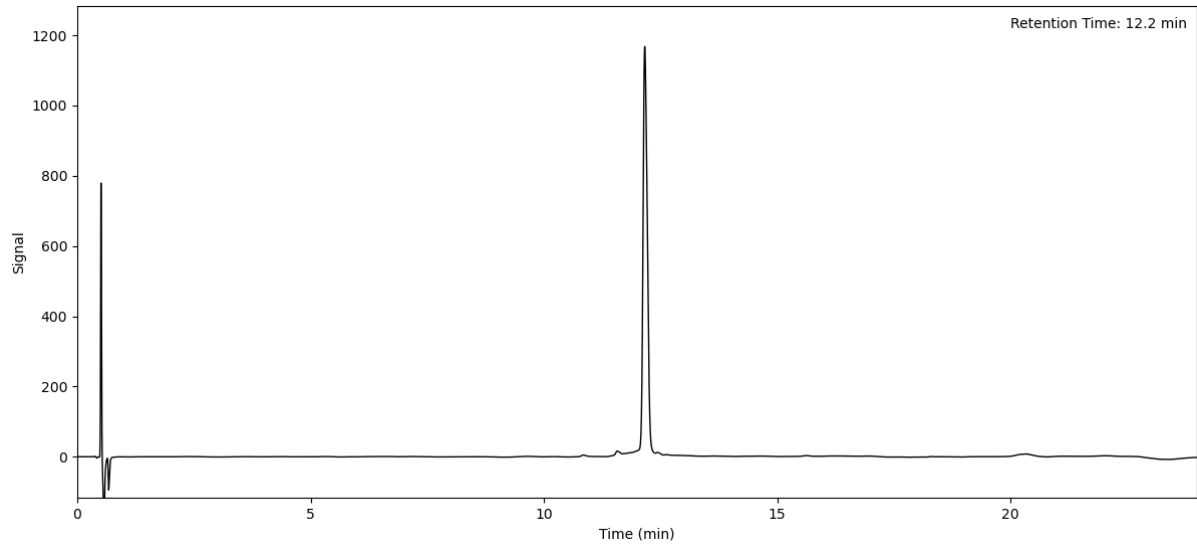

Peptide S7 (Method A)

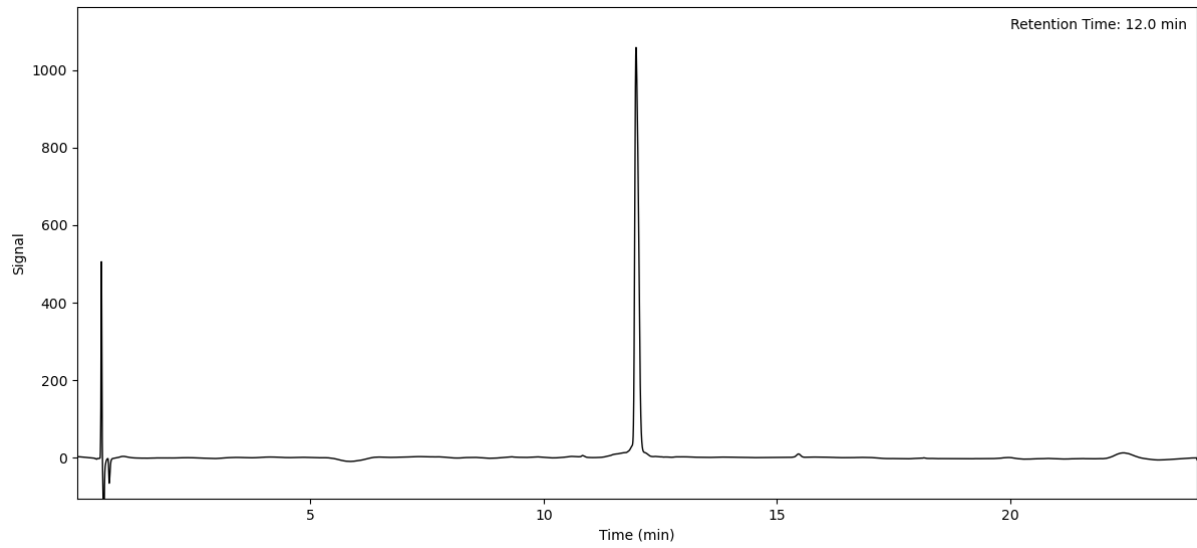

Peptide S8 (Method A)

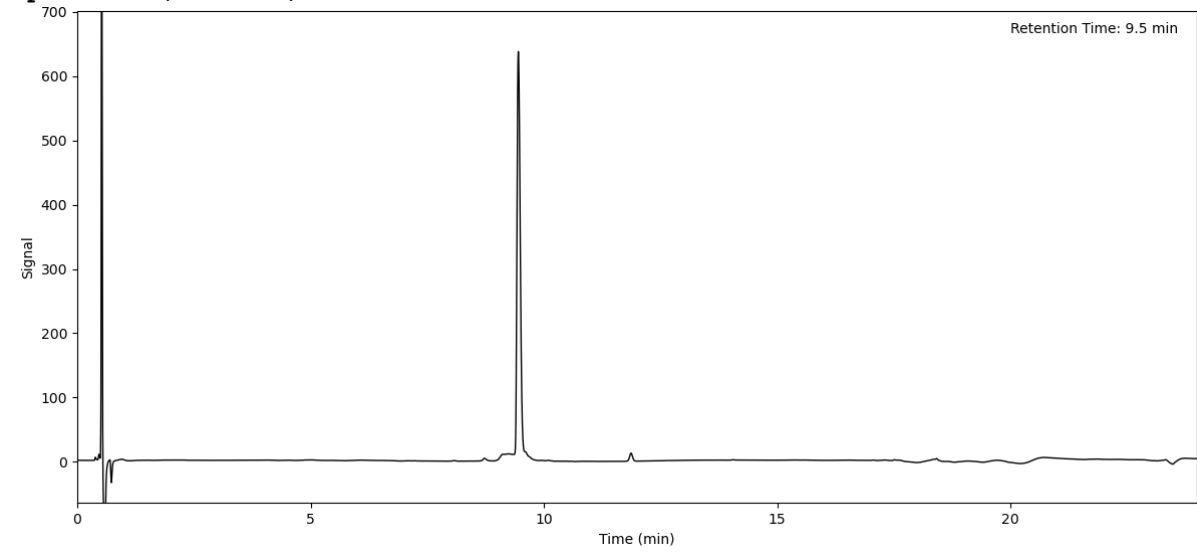

**Peptide S9 (Method A)**

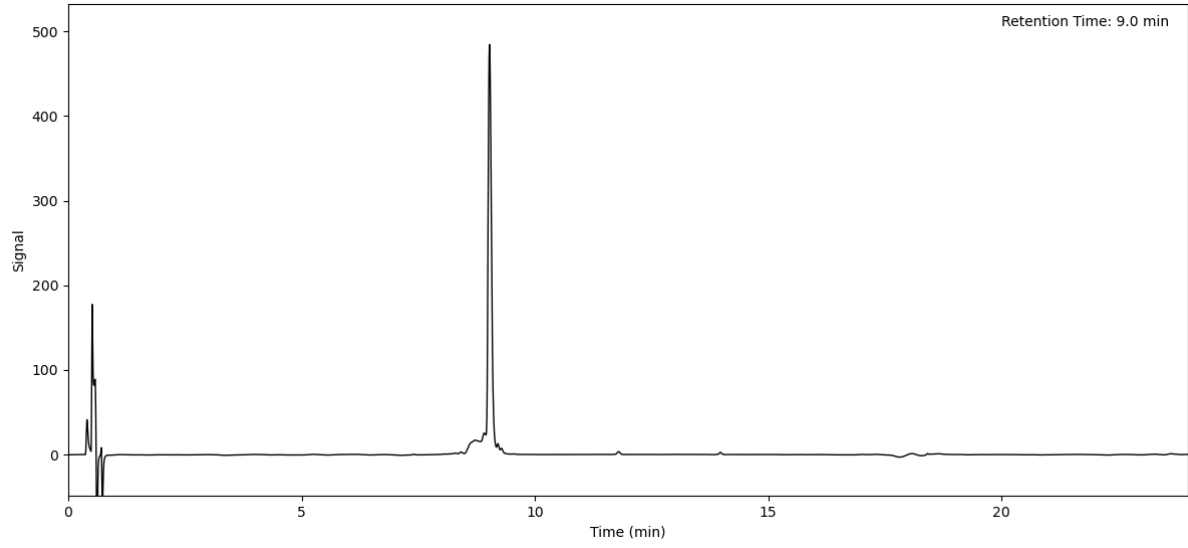

**Peptide S10 (Method A)**

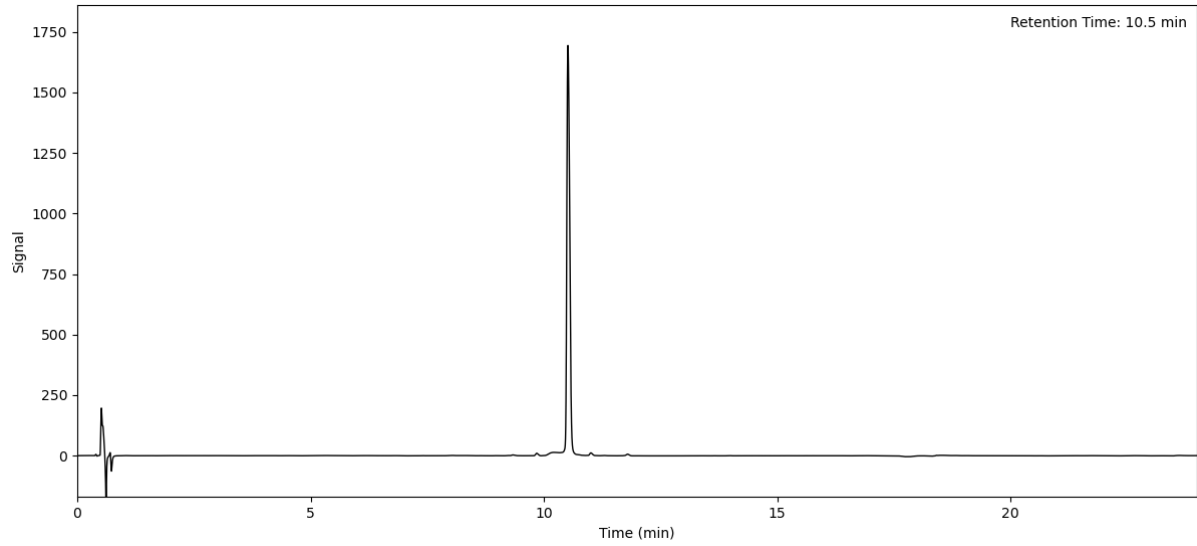

**Peptide S11 (Method A)**

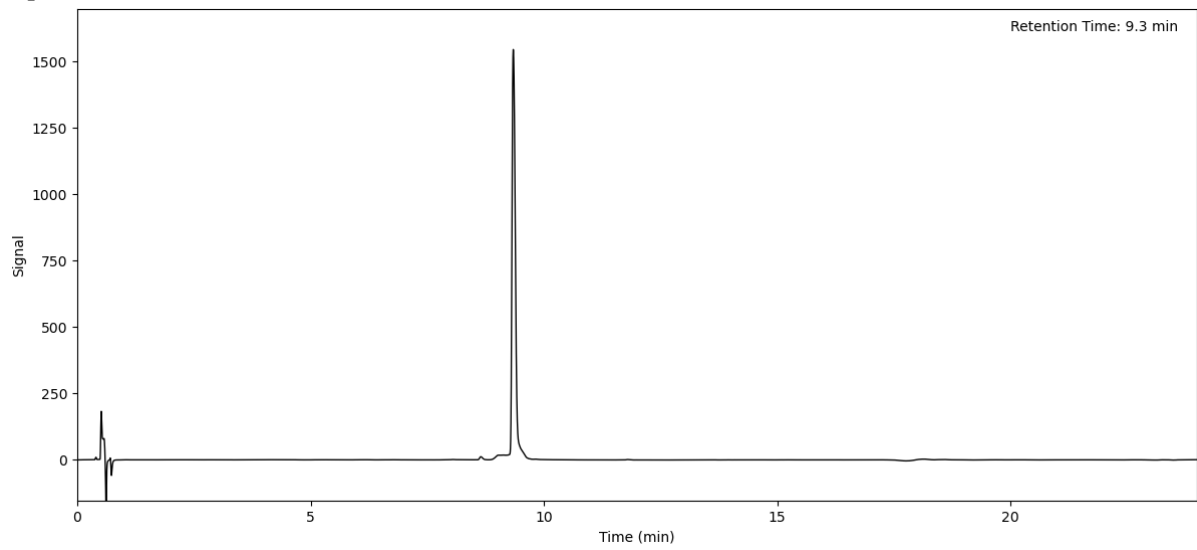



**Peptide S12 (Method A)**

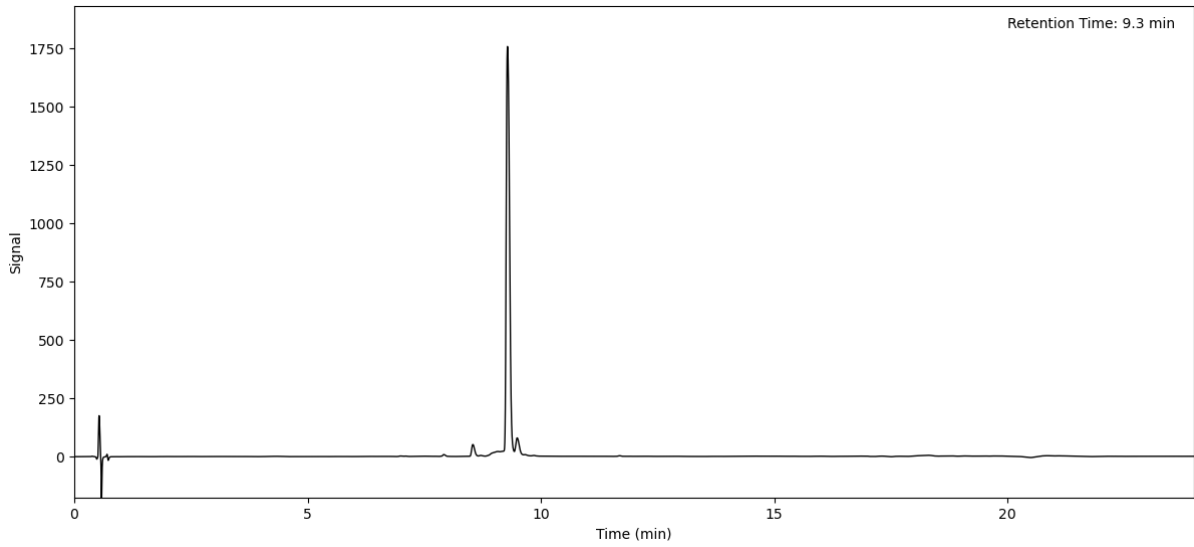

**Peptide S13 (Method A)**

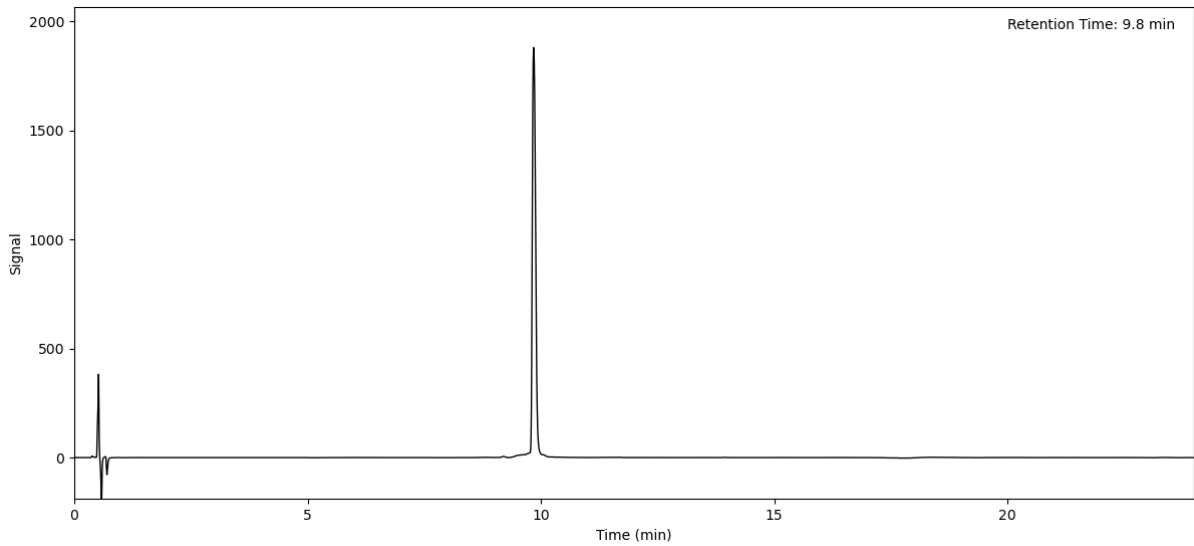

**Peptide S14 (Method A)**

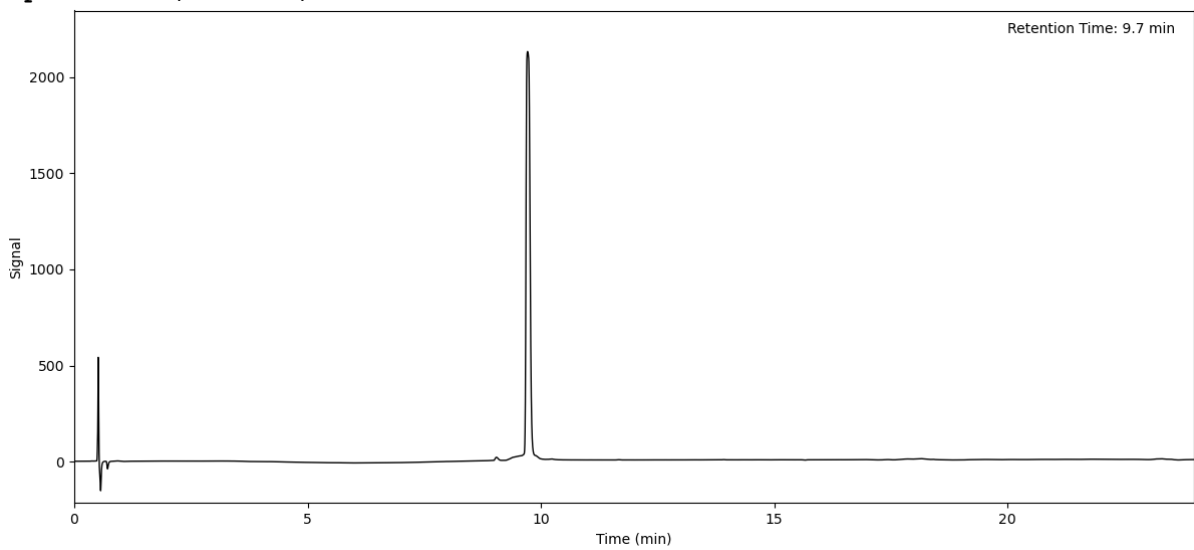

**Peptide S15 (Method A)**

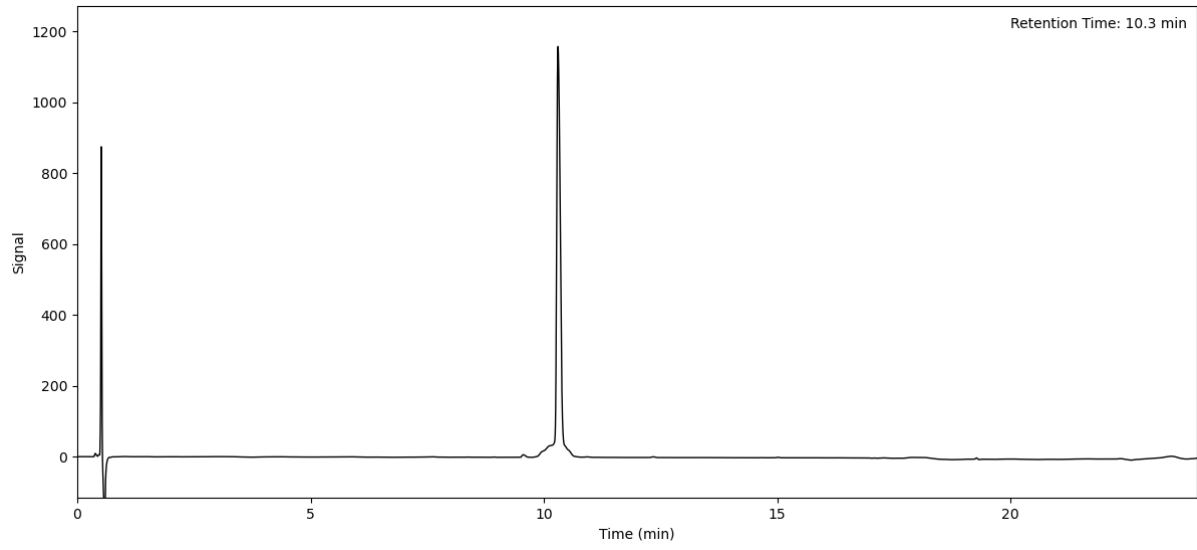

**Peptide S16 (Method A)**

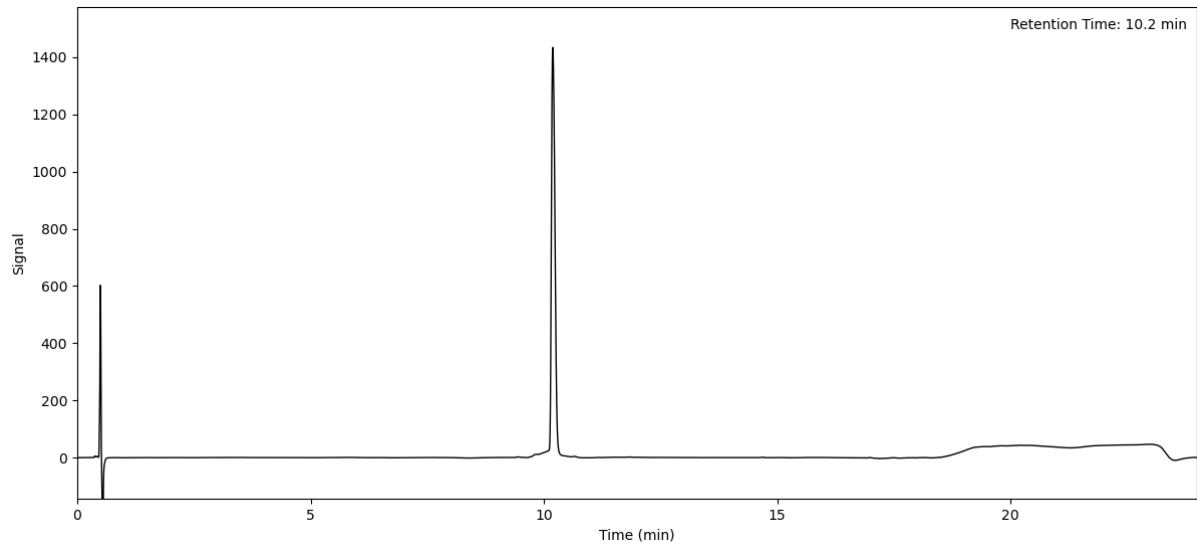

**Peptide S17 (Method A)**

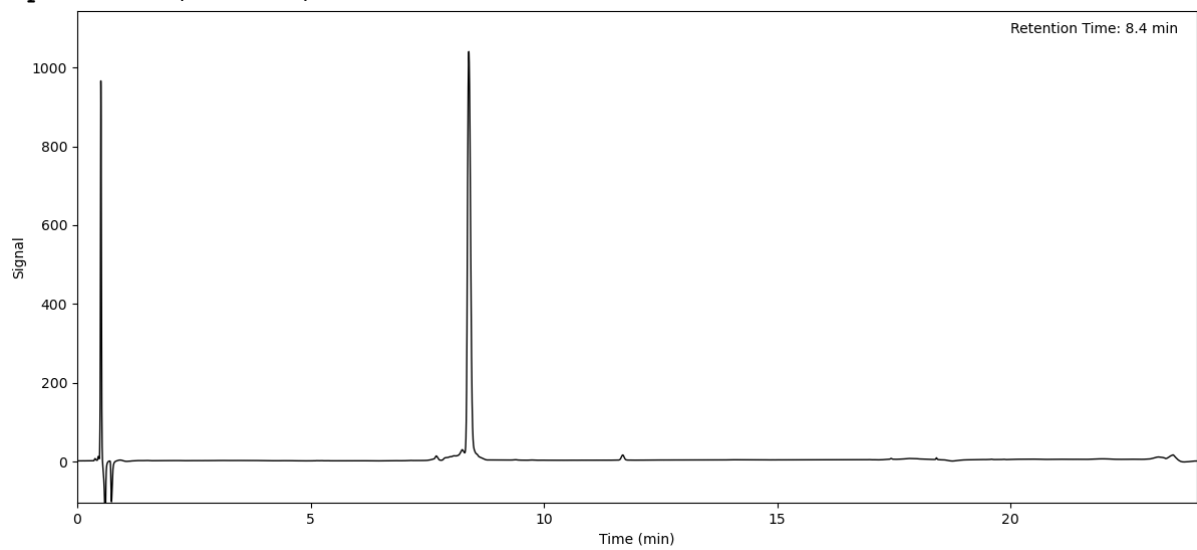

**Peptide S18 (Method A)**

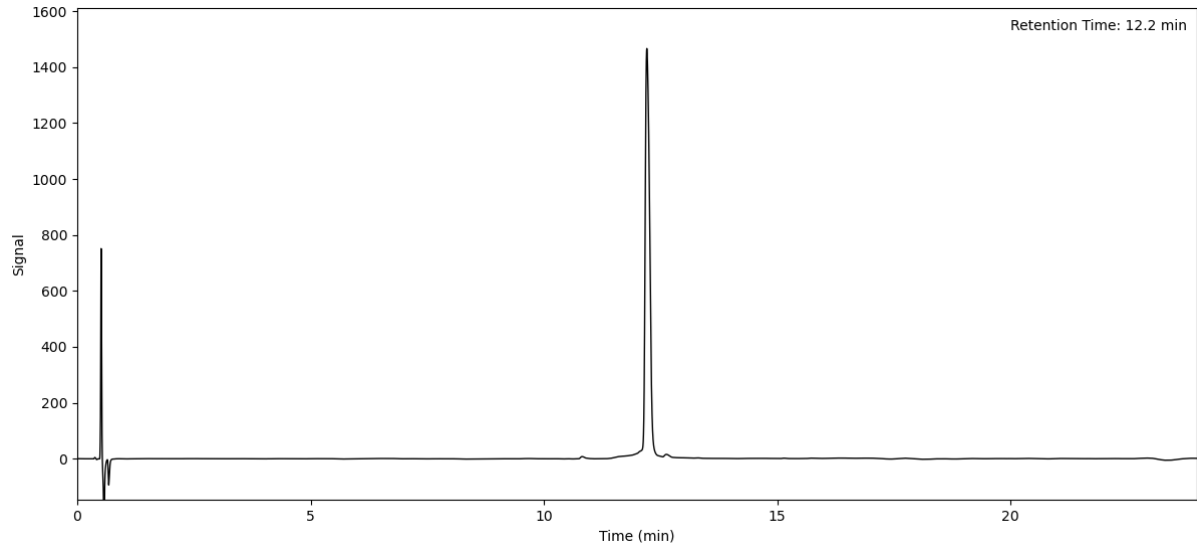

**Peptide S19 (Method A)**

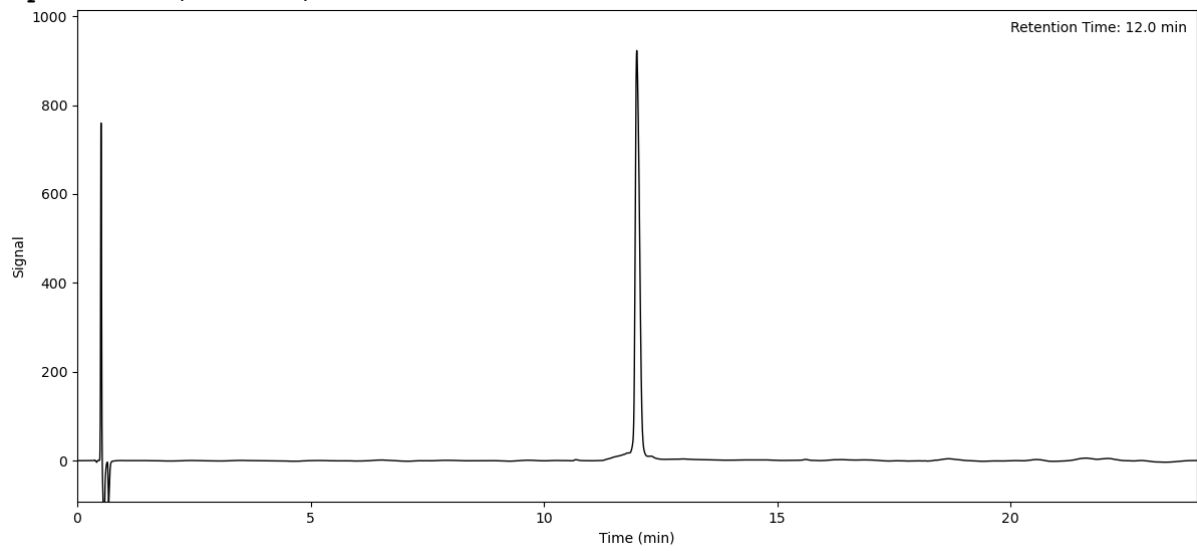

**Peptide S20 (Method A)**

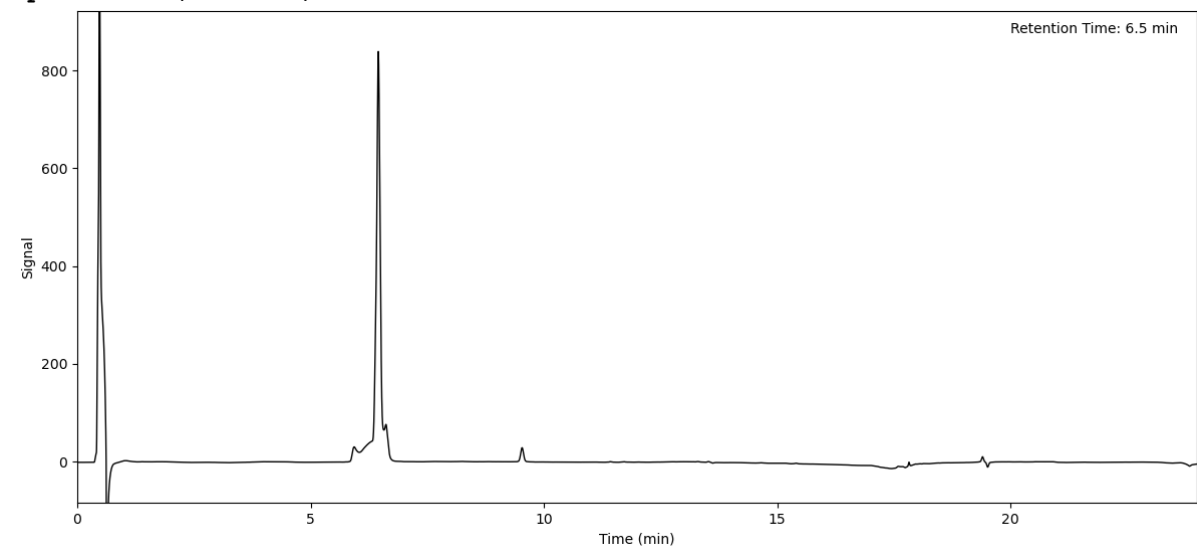

**Peptide S21 (Method A)**

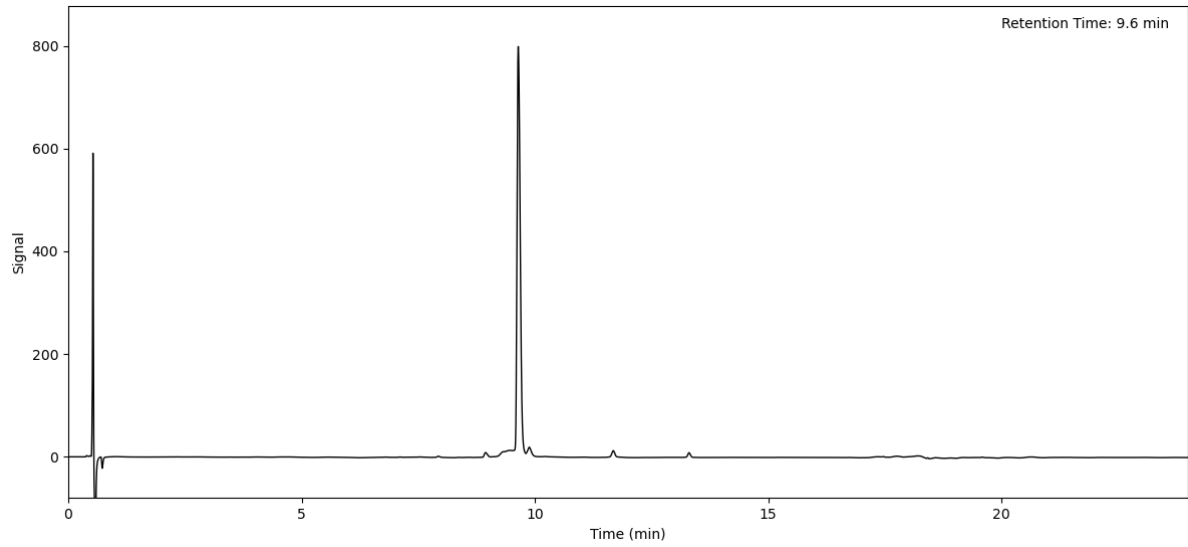

**Peptide S22 (Method A)**

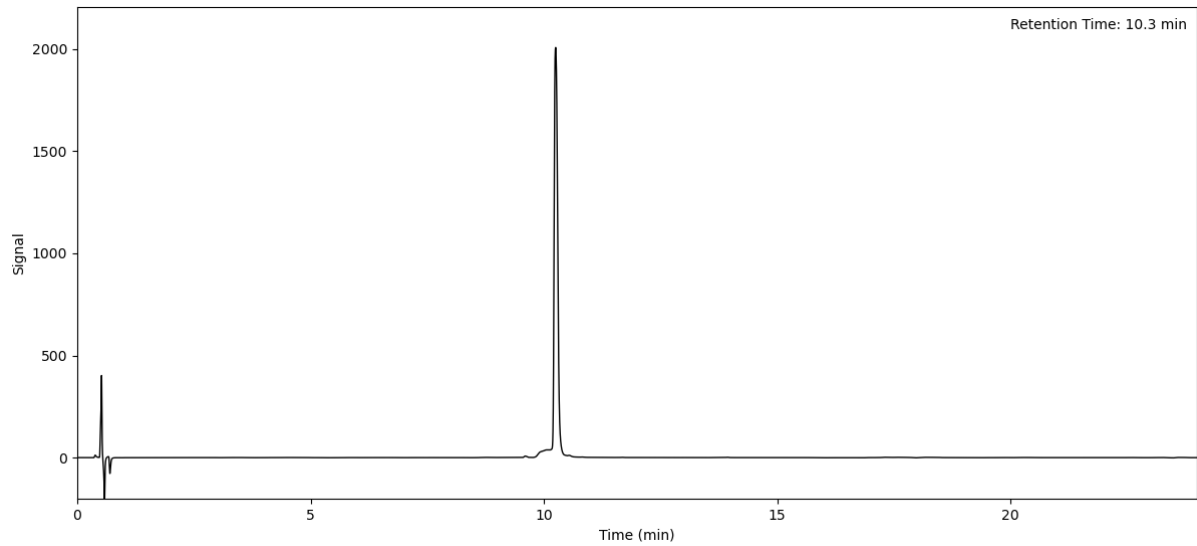

**Peptide S23 (Method A)**

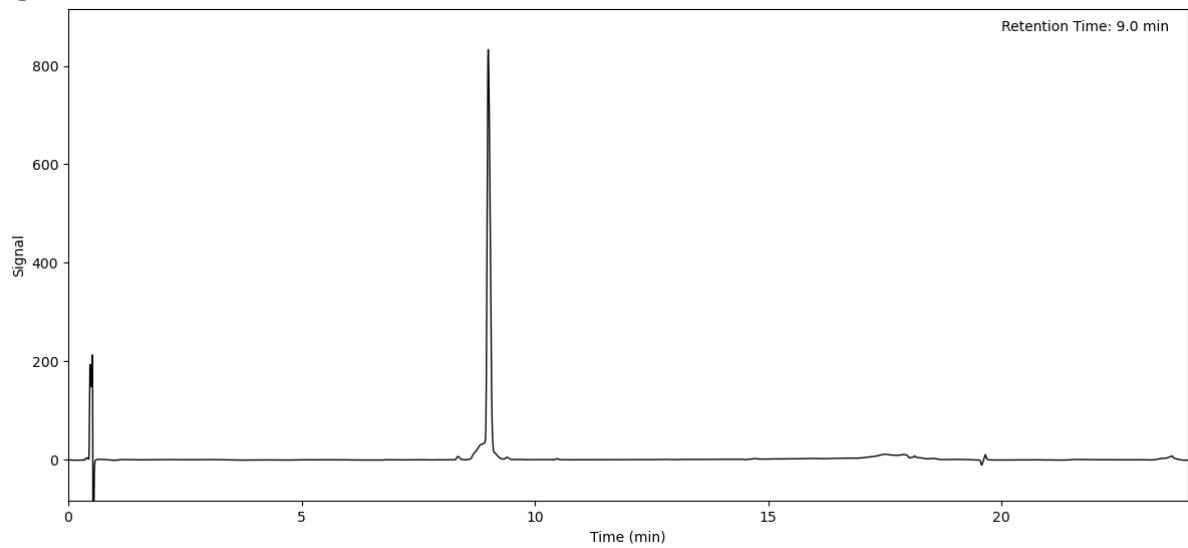

Peptide S24 (Method A)

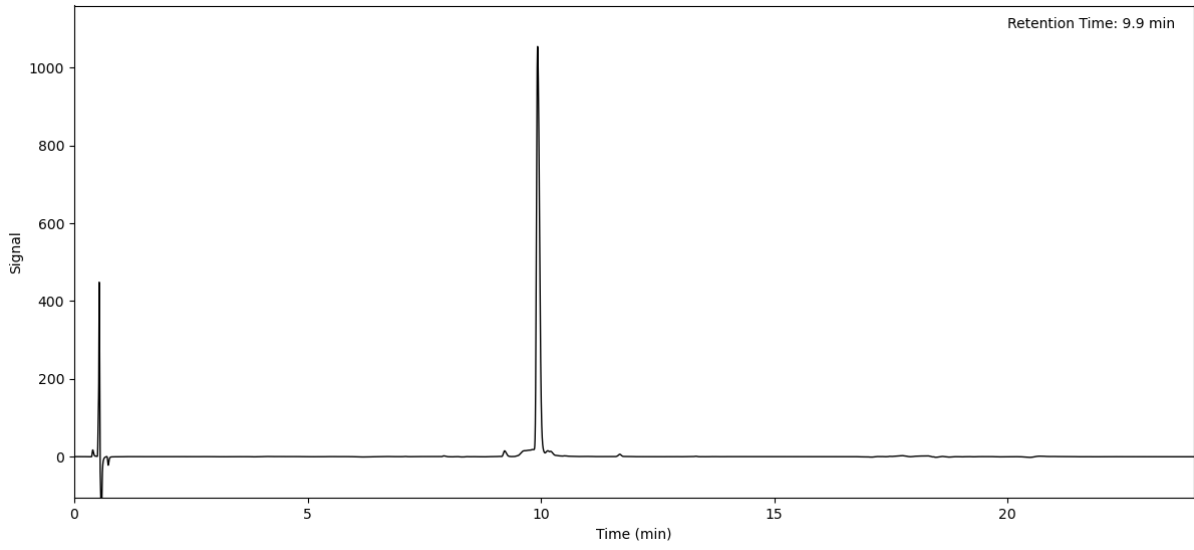

Peptide S25 (Method A)

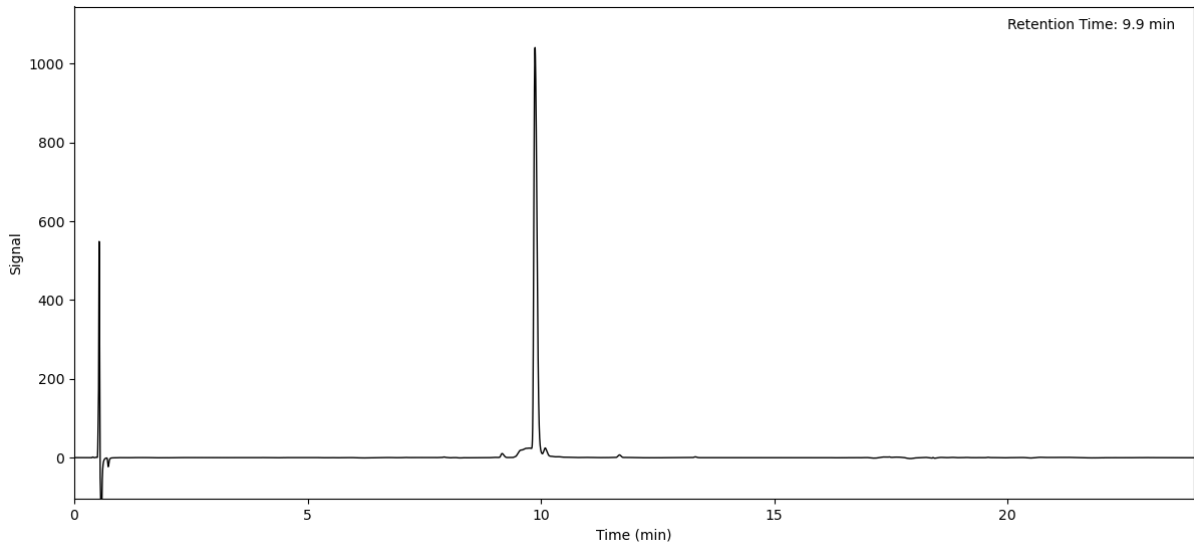

Peptide S26 (Method A)

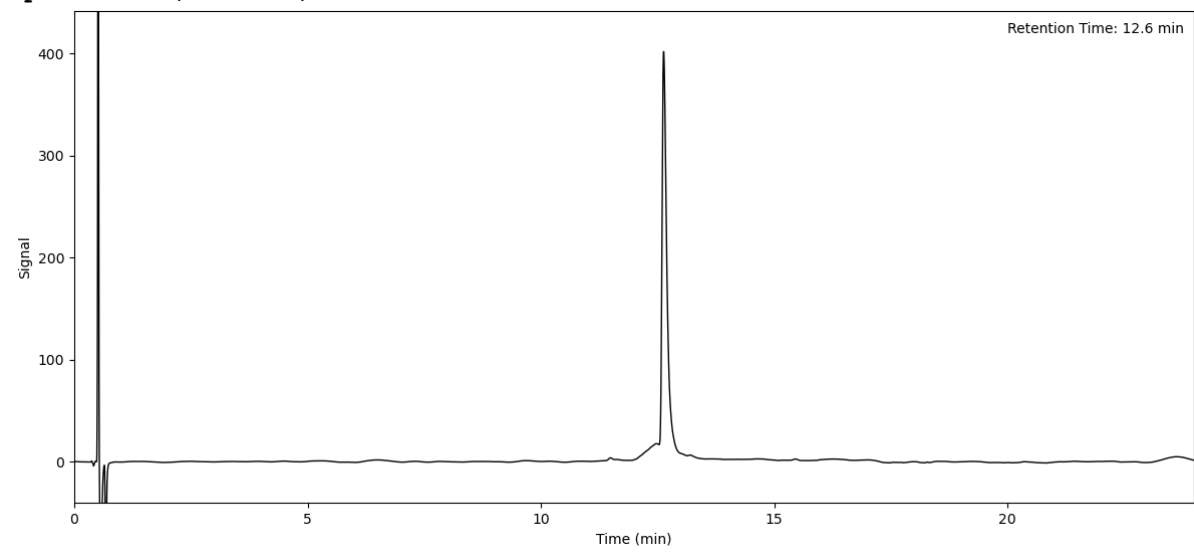

**Peptide S27 (Method A)**

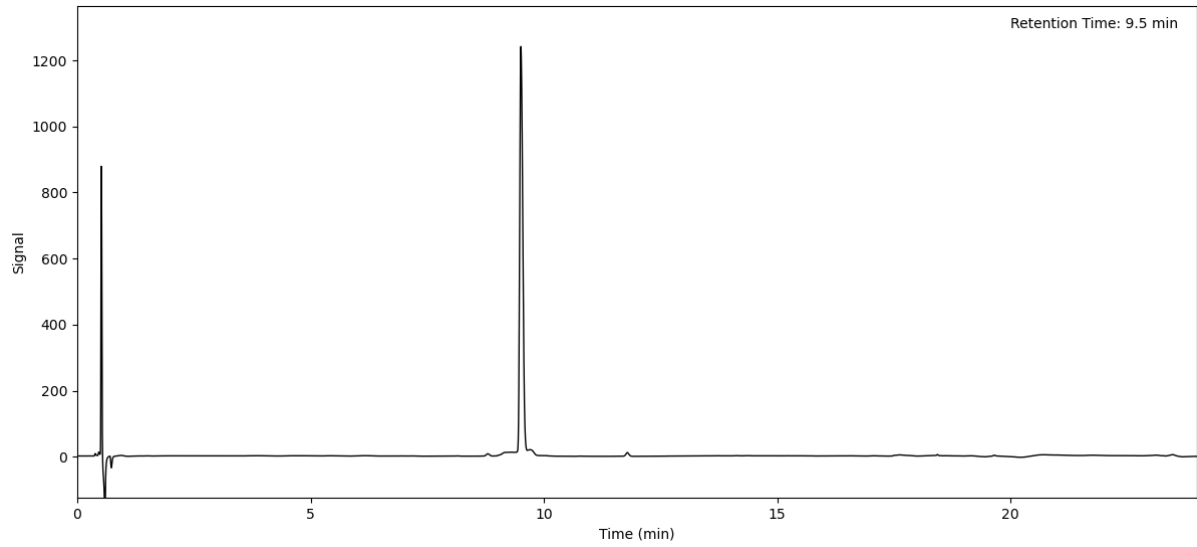

**Peptide S28 (Method A)**

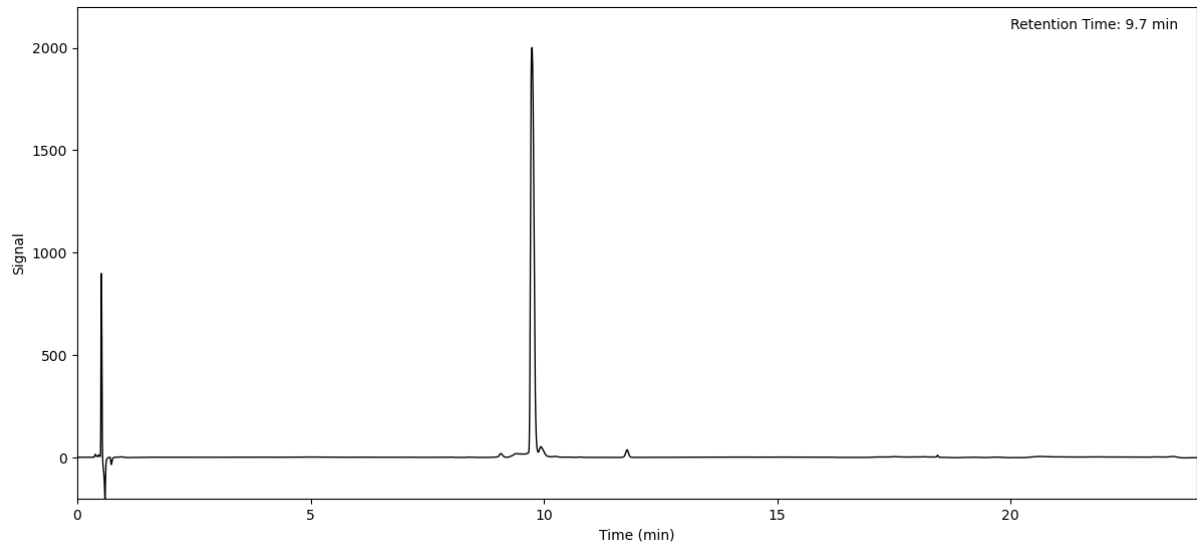

**Peptide S29 (Method A)**

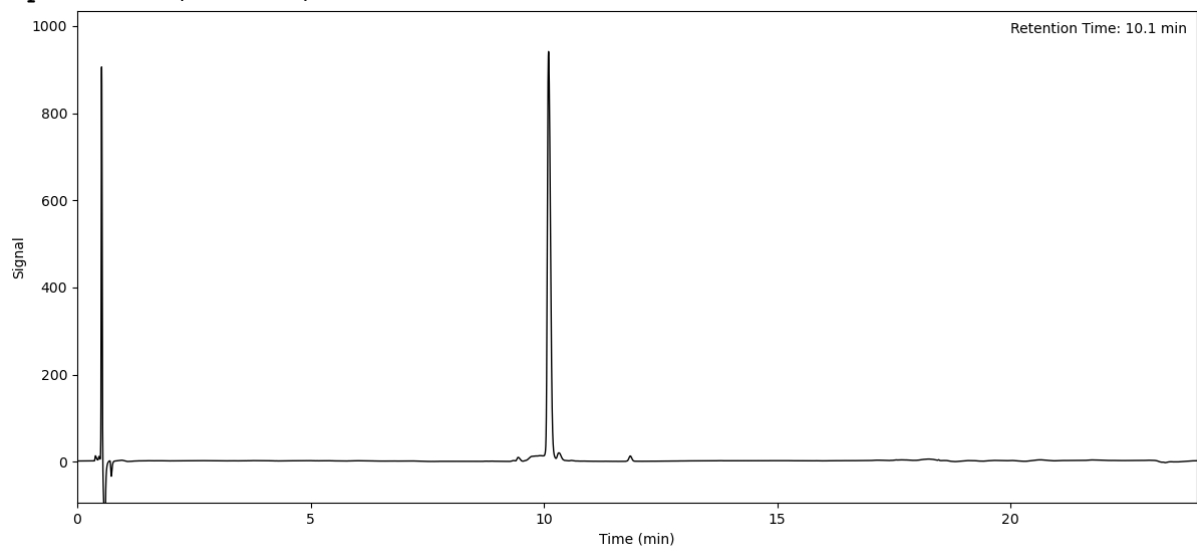

**Peptide S30 (Method A)**

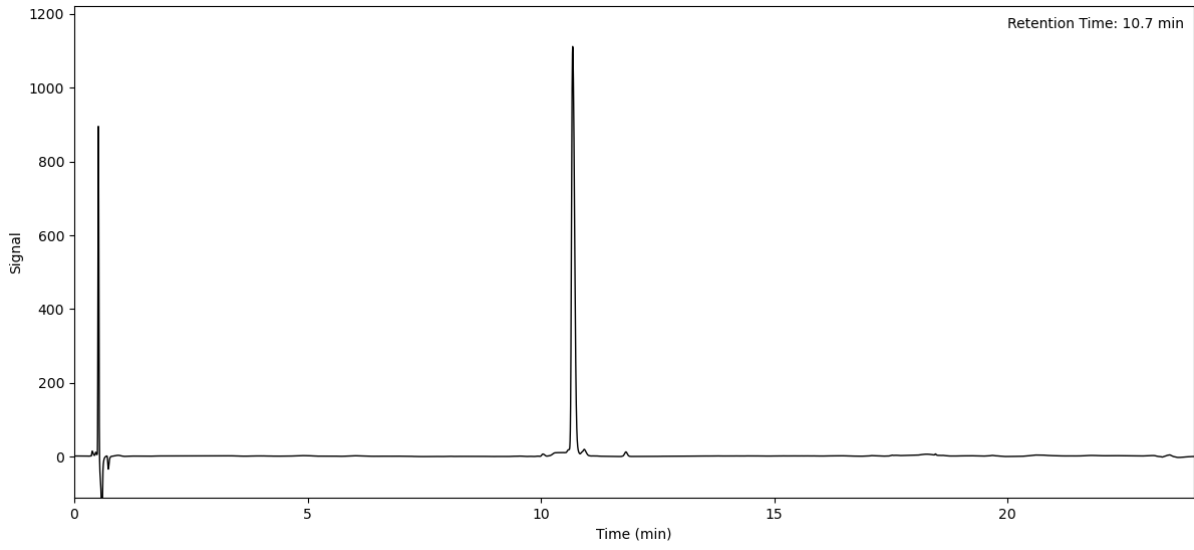

**Peptide S31 (Method A)**

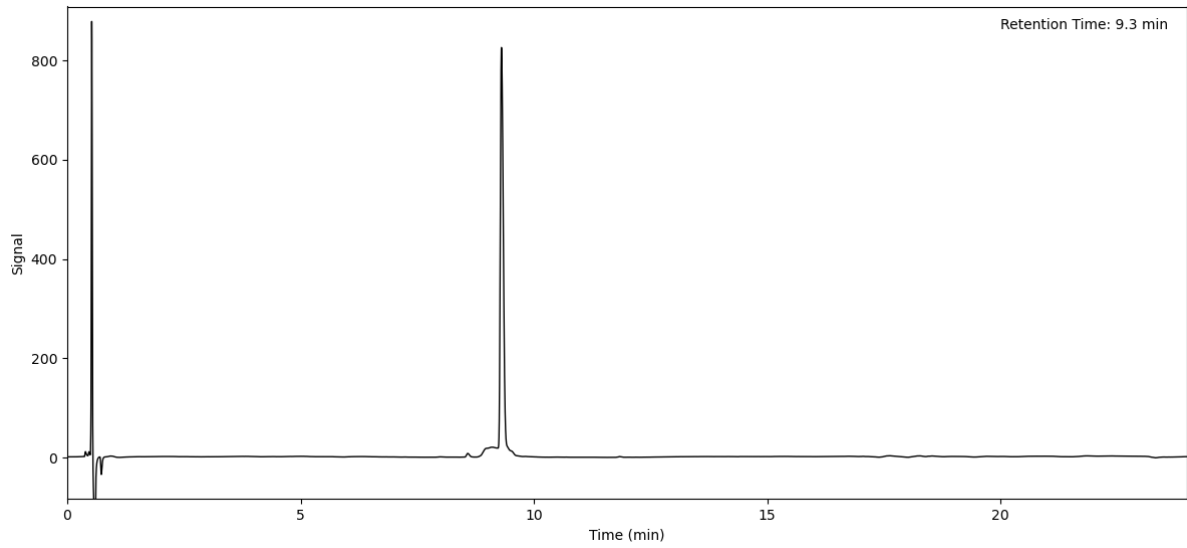

**Peptide S32 (Method A)**

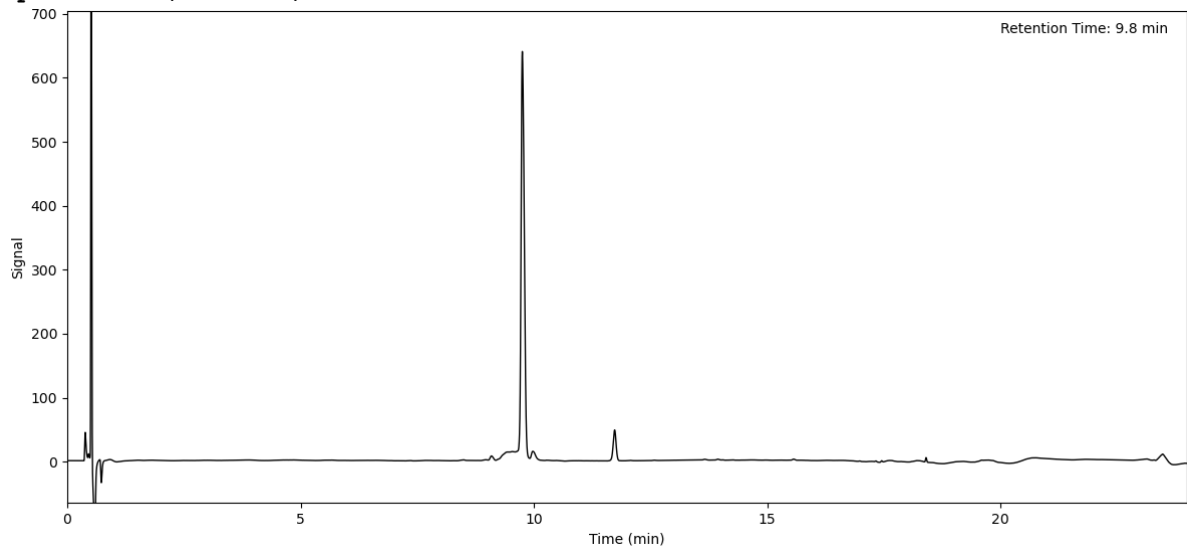

**Peptide S33 (Method A)**

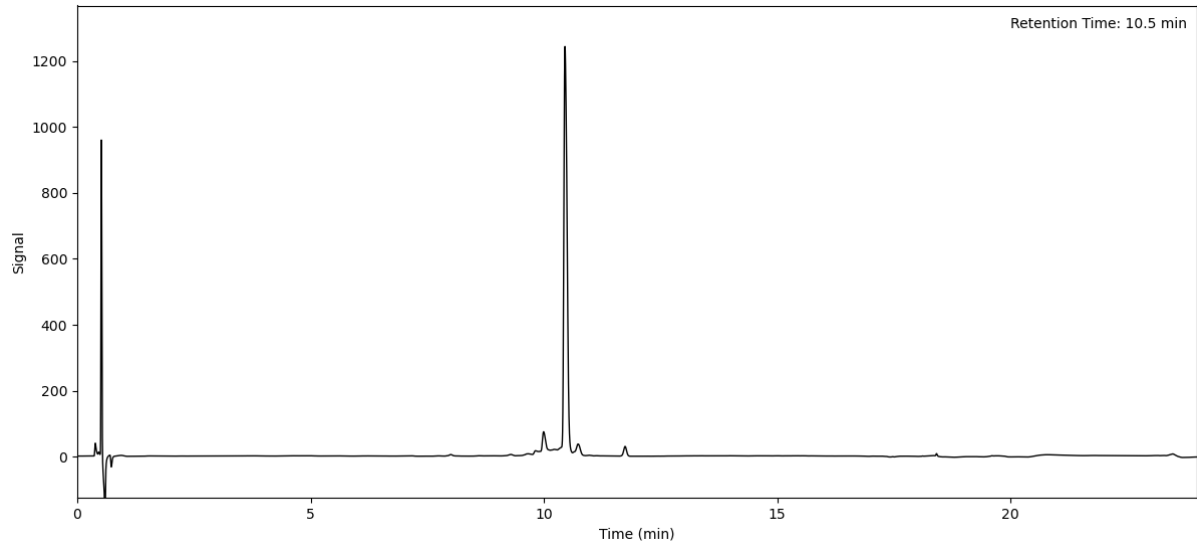

**Peptide S34 (Method A)**

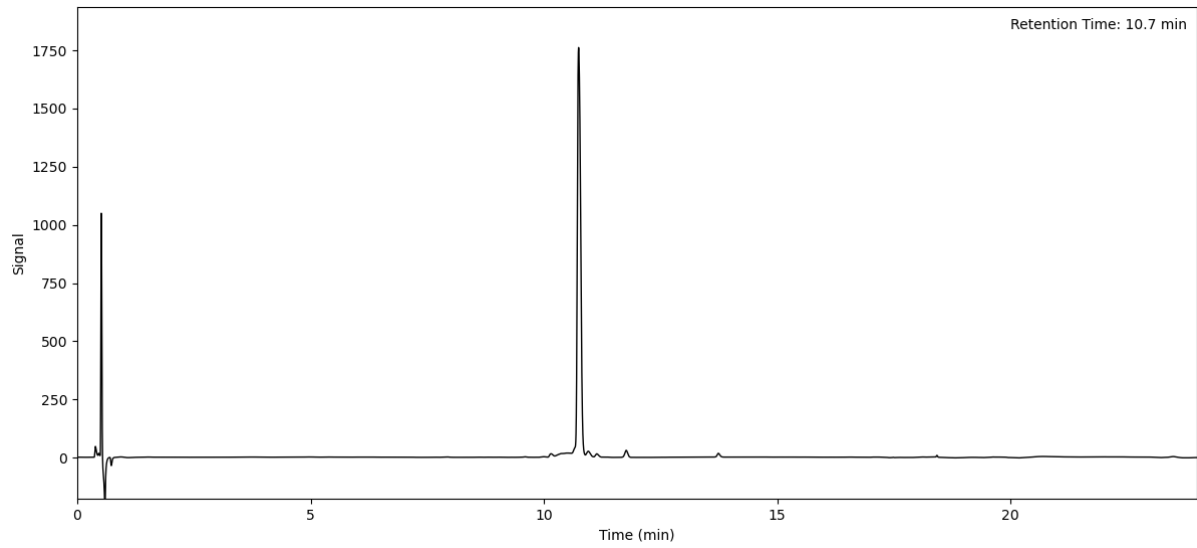

**H4 histone tail peptide (the MTase Glo substrate) (Method A)**

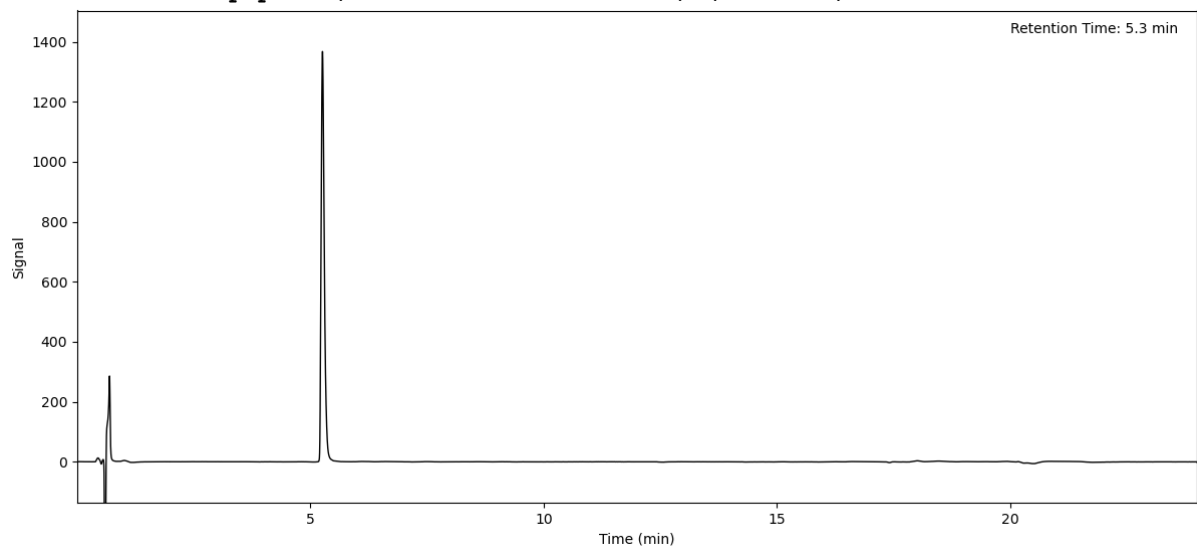

Supplement: jm2c01273_si_001.pdf [file jm2c01273_si_001.pdf]
